# Supplementary material for: Dynamic Black-Litterman
Source: Atypon-hosted journal article supplement (doi:10.1287/opre.2024.1010), 2025-08-22
Supplement: opre.2024.1010.sm1.pdf [file opre.2024.1010.sm1.pdf]

## Prerequisites

We recall some properties of conditioning over Gaussian vectors  $(\mathbf{X}, \mathbf{Y}) \in \mathbb{R}^{N+K}$ , where  $\mathbf{X} \in \mathbb{R}^N$  and  $\mathbf{Y} \in \mathbb{R}^K$  with respective means  $\boldsymbol{\mu}_X$  and  $\boldsymbol{\mu}_Y$  and covariance matrices  $\boldsymbol{\Sigma}_{XX}$  and  $\boldsymbol{\Sigma}_{YY}$ . Denote by  $\boldsymbol{\Sigma}_{XY}$  the cross-covariance between  $\mathbf{X}$  and  $\mathbf{Y}$ . The conditional distribution of  $\mathbf{X}$  given  $\mathbf{Y} = \mathbf{y}$  remains Gaussian, with conditional mean given by

$$\mathbb{E}[\mathbf{X} \mid \mathbf{Y} = \mathbf{y}] = \boldsymbol{\mu}_X + \boldsymbol{\Sigma}_{XY} \boldsymbol{\Sigma}_{YY}^{-1} (\mathbf{y} - \boldsymbol{\mu}_Y) \quad (\text{EC.1})$$

and conditional variance

$$\mathbb{V}[\mathbf{X} \mid \mathbf{Y} = \mathbf{y}] = \boldsymbol{\Sigma}_{XX} - \boldsymbol{\Sigma}_{XY} \boldsymbol{\Sigma}_{YY}^{-1} \boldsymbol{\Sigma}_{XY}^\top. \quad (\text{EC.2})$$

The Woodbury matrix identity ([Hager \(1989\)](#)) will be used repeatedly: let  $\boldsymbol{\Sigma} \in \mathbb{R}^{N \times N}$  and  $\boldsymbol{\Omega} \in \mathbb{R}^{K \times K}$  be invertible, and  $\mathbf{U} \in \mathbb{R}^{N \times K}$ ,  $\mathbf{V} \in \mathbb{R}^{K \times N}$ . Then

$$(\boldsymbol{\Sigma} + \mathbf{U} \boldsymbol{\Omega} \mathbf{V})^{-1} = \boldsymbol{\Sigma}^{-1} - \boldsymbol{\Sigma}^{-1} \mathbf{U} (\boldsymbol{\Omega}^{-1} + \mathbf{V} \boldsymbol{\Sigma}^{-1} \mathbf{U})^{-1} \mathbf{V} \boldsymbol{\Sigma}^{-1}.$$

### EC.1. Section 3 – Proof of Proposition 1

The proof of the proposition can be split into two parts: We first derive the drift and volatility of the conditional log-returns process, then use these expressions to show that the process can be written as a solution of a Stochastic Differential Equation (SDE). Finally, we derive the SDE of the conditional price process using Itô's Lemma.

#### EC.1.1. Conditional Mean and Covariance of the Log>Returns

The price process  $\mathbf{S}(t)$ , log-returns  $\mathbf{X}(t)$  and views  $\mathbf{Y}(0, T)$  are given by equations (9)–(10), respectively. The investment horizon is  $T$  and Assumption 1 is assumed to hold.

The vector  $(\mathbf{X}(t), \mathbf{Y}(0, T))$  is then Gaussian with

$$\begin{pmatrix} \mathbf{X}(t) \\ \mathbf{Y}(0, T) \end{pmatrix} \sim \mathcal{N}\left(\begin{pmatrix} t \boldsymbol{\mu}^x \\ T \mathbf{P} \boldsymbol{\mu}^x \end{pmatrix}, \mathbf{M}\right),$$

where the covariance matrix  $\mathbf{M} \in \mathbb{R}^{(N+K) \times (N+K)}$  is positive definite with block form

$$\mathbf{M} = \begin{pmatrix} t \boldsymbol{\Sigma} & t \boldsymbol{\Sigma} \mathbf{P}^\top \\ t \mathbf{P} \boldsymbol{\Sigma} & T (\mathbf{P} \boldsymbol{\Sigma} \mathbf{P}^\top + \boldsymbol{\Omega}) \end{pmatrix}.$$

Since the log-returns vector and views are jointly Gaussian, the distribution of any subset of the log-returns given any subset of the views remains Gaussian, fully specified by its conditional mean and covariance.

By (EC.1), the conditional mean is

$$\begin{aligned} \mathbb{E}[\mathbf{X}(t) \mid \mathbf{Y}(0, T) = \mathbf{y}] &= \mathbb{E}[\mathbf{X}(t)] + \text{Cov}(\mathbf{X}(t), \mathbf{Y}(0, T)) \mathbb{V}[\mathbf{Y}(0, T)]^{-1} (\mathbf{y} - \mathbb{E}[\mathbf{Y}(0, T)]) \\ &= t \boldsymbol{\mu}^x + t \boldsymbol{\beta}_1 (\mathbf{y} - T \mathbf{P} \boldsymbol{\mu}^x), \end{aligned} \quad (\text{EC.3})$$

where

$$\beta_1 = \frac{1}{T} \Sigma \mathbf{P}^\top (\mathbf{P} \Sigma \mathbf{P}^\top + \Omega)^{-1}.$$

By (EC.2), the conditional covariance is

$$\begin{aligned} \mathbb{V}[\mathbf{X}(t) \mid \mathbf{Y}(0, T) = \mathbf{y}] &= \mathbb{V}[\mathbf{X}(t)] - \text{Cov}(\mathbf{X}(t), \mathbf{Y}(0, T)) \mathbb{V}[\mathbf{Y}(0, T)]^{-1} \text{Cov}(\mathbf{Y}(0, T), \mathbf{X}(t)) \\ &= t \Sigma - \frac{t^2}{T} \Sigma \mathbf{P}^\top (\mathbf{P} \Sigma \mathbf{P}^\top + \Omega)^{-1} \mathbf{P} \Sigma. \end{aligned}$$

A similar argument shows that for  $t, \tau \leq T$ , the conditional covariance between  $\mathbf{X}(t)$  and  $\mathbf{X}(\tau)$  given  $\mathbf{Y}(0, T) = \mathbf{y}$  is

$$\text{Cov}(\mathbf{X}(t), \mathbf{X}(\tau) \mid \mathbf{Y}(0, T) = \mathbf{y}) = \min\{t, \tau\} \Sigma - \frac{t\tau}{T} \Sigma \mathbf{P}^\top (\mathbf{P} \Sigma \mathbf{P}^\top + \Omega)^{-1} \mathbf{P} \Sigma.$$

We now use these expressions to derive the distribution of the conditional dynamics  $d\mathbf{X}(t) \mid \mathbf{Y}(0, T) = \mathbf{y}$ .

### EC.1.2. Conditional Dynamics

Consider an increment of the process  $\mathbf{X}(t)$  over  $[t, t + dt]$  given the history  $\{\mathbf{X}(\tau), \tau \leq t\}$  and views  $\mathbf{Y}(0, T) = \mathbf{y}$ :

$$d\mathbf{X}(t) \mid (\mathbf{Y}(0, T) = \mathbf{y}, \{\mathbf{X}(\tau)_{\tau \leq t}\}) = \lim_{dt \rightarrow 0} (\mathbf{X}(t + dt) - \mathbf{X}(t)) \mid (\mathbf{Y}(0, T) = \mathbf{y}, \{\mathbf{X}(\tau)_{\tau \leq t}\}).$$

Since the log-returns vector is driven by a Brownian motion  $\mathbf{W}(t)$ , it is Markovian and the information contained in the historical data  $\{\mathbf{X}(\tau), \tau \leq t\}$  is all stored in the last state  $\mathbf{X}(t)$ , thus

$$(\mathbf{X}(t + dt) - \mathbf{X}(t)) \mid (\mathbf{Y}(0, T) = \mathbf{y}, \{\mathbf{X}(\tau)_{\tau \leq t}\}) = (\mathbf{X}(t + dt) - \mathbf{X}(t)) \mid (\mathbf{Y}(0, T) = \mathbf{y}, \mathbf{X}(t)).$$

Since  $\mathbf{X}(t)$  and  $\mathbf{Y}(0, T)$  are Gaussian,  $(\mathbf{X}(t + dt) \mid \mathbf{Y}(0, T) = \mathbf{y}, \mathbf{X}(t))$  is also Gaussian and fully identified by its mean and covariance matrix which we derive next.

**Mean of the conditional dynamics.** Consider the random variable  $\mathbf{Z}(t) = (\mathbf{X}(t), \mathbf{Y}(0, T))^\top$ , and its realization  $\mathbf{z} = (\mathbf{x}, \mathbf{y})^\top$ . The vector  $(\mathbf{X}(t + dt), \mathbf{Z}(t))^\top$  is jointly Gaussian. By (EC.1) the conditional expectation of the log-returns at time  $t + dt$  given  $\mathbf{Z}(t) = \mathbf{z}$  is

$$\begin{aligned} \mathbb{E}[\mathbf{X}(t + dt) \mid \mathbf{X}(t) = \mathbf{x}, \mathbf{Y}(0, T) = \mathbf{y}] &= \mathbb{E}[\mathbf{X}(t + dt) \mid \mathbf{Z}(t) = \mathbf{z}] \\ &= \mathbb{E}[\mathbf{X}(t + dt)] + \text{Cov}(\mathbf{X}(t + dt), \mathbf{Z}(t)) \mathbb{V}[\mathbf{Z}(t)]^{-1} (\mathbf{z} - \mathbb{E}[\mathbf{Z}(t)]) \end{aligned}$$

where the covariance matrix of  $\mathbf{Z}(t)$  is

$$\mathbb{V}[\mathbf{Z}(t)] = \begin{pmatrix} t \Sigma & t \Sigma \mathbf{P}^\top \\ t \mathbf{P} \Sigma & T(\mathbf{P} \Sigma \mathbf{P}^\top + \Omega) \end{pmatrix} \quad (\text{EC.4})$$

the covariance between  $\mathbf{X}(t + dt)$  and  $\mathbf{Z}(t)$  is

$$\text{Cov}(\mathbf{X}(t + dt), \mathbf{Z}(t)) = \begin{pmatrix} t \Sigma \\ (t + dt) \Sigma \mathbf{P}^\top \end{pmatrix}^\top$$

and

$$\mathbf{z} - \mathbb{E}[\mathbf{Z}(t)] = \begin{bmatrix} \mathbf{x} - t\boldsymbol{\mu}^x \\ \mathbf{y} - T\mathbf{P}\boldsymbol{\mu}^x \end{bmatrix}.$$

We now derive the explicit expression of the inverse of the covariance matrix (EC.4). By [Lu and Shiou \(2002\)](#), the inverse of a  $2 \times 2$  block matrix  $\mathbf{R}$  is

$$\mathbf{R}^{-1} = \begin{pmatrix} \mathbf{A} & \mathbf{B} \\ \mathbf{C} & \mathbf{D} \end{pmatrix}^{-1} = \begin{pmatrix} (\mathbf{A} - \mathbf{B}\mathbf{D}^{-1}\mathbf{C})^{-1} & -(\mathbf{A} - \mathbf{B}\mathbf{D}^{-1}\mathbf{C})^{-1}\mathbf{B}\mathbf{D}^{-1} \\ -\mathbf{D}^{-1}\mathbf{C}(\mathbf{A} - \mathbf{B}\mathbf{D}^{-1}\mathbf{C})^{-1} & \mathbf{D}^{-1} + \mathbf{D}^{-1}\mathbf{C}(\mathbf{A} - \mathbf{B}\mathbf{D}^{-1}\mathbf{C})^{-1}\mathbf{B}\mathbf{D}^{-1} \end{pmatrix}$$

where  $\mathbf{R}$  has size  $N + K \times 2N$ ,  $\mathbf{A}$  and  $\mathbf{B}$  are  $N \times N$ ,  $\mathbf{C}$  and  $\mathbf{D}$  are  $K \times N$ , and  $\mathbf{D}$  is a non-singular matrix. The Woodbury matrix identity gives

$$(\mathbf{A} - \mathbf{B}\mathbf{D}^{-1}\mathbf{C})^{-1} = \mathbf{A}^{-1} - \mathbf{A}^{-1}\mathbf{B}(\mathbf{D} + \mathbf{C}\mathbf{A}^{-1}\mathbf{B})\mathbf{C}\mathbf{A}^{-1}.$$

Letting  $\mathbf{A} = \mathbf{B} = t\boldsymbol{\Sigma}$ ,  $\mathbf{C} = t\mathbf{P}\boldsymbol{\Sigma}$ , and  $\mathbf{D} = T(\mathbf{P}\boldsymbol{\Sigma}\mathbf{P}^\top + \boldsymbol{\Omega})$ , we have

$$\mathbb{V}[\mathbf{Z}(t)] = \mathbb{V}[\mathbf{Z}(t)] = \begin{pmatrix} t\boldsymbol{\Sigma} & t\boldsymbol{\Sigma}\mathbf{P}^\top \\ t\mathbf{P}\boldsymbol{\Sigma} & T(\mathbf{P}\boldsymbol{\Sigma}\mathbf{P}^\top + \boldsymbol{\Omega}) \end{pmatrix}$$

and hence

$$\begin{aligned} & \text{Cov}(\mathbf{X}(t+dt), \mathbf{Z}(t))\mathbb{V}[\mathbf{Z}(t)]^{-1} \\ &= [\mathbf{I}_N - dt\boldsymbol{\Sigma}\mathbf{P}^\top((T-t)\mathbf{P}\boldsymbol{\Sigma}\mathbf{P}^\top + T\boldsymbol{\Omega})^{-1}\mathbf{P}, dt\boldsymbol{\Sigma}\mathbf{P}^\top((T-t)\mathbf{P}\boldsymbol{\Sigma}\mathbf{P}^\top + T\boldsymbol{\Omega})^{-1}]. \end{aligned}$$

It follows that the conditional mean is

$$\begin{aligned} & \mathbb{E}[\mathbf{X}(t+dt) - \mathbf{X}(t) | \mathbf{X}(t) = \mathbf{x}, \mathbf{Y}(0, T) = \mathbf{y}] \\ &= dt \left( \boldsymbol{\mu}^x - \boldsymbol{\Sigma}\mathbf{P}^\top((T-t)\mathbf{P}\boldsymbol{\Sigma}\mathbf{P}^\top + T\boldsymbol{\Omega})^{-1}\mathbf{P}(\mathbf{X}(t) - t\boldsymbol{\mu}^x) \right. \\ & \quad \left. + \boldsymbol{\Sigma}\mathbf{P}^\top((T-t)\mathbf{P}\boldsymbol{\Sigma}\mathbf{P}^\top + T\boldsymbol{\Omega})^{-1}(\mathbf{y} - T\mathbf{P}\boldsymbol{\mu}^x) \right). \end{aligned} \tag{EC.5}$$

Woodbury's matrix identity gives

$$\boldsymbol{\Sigma}\mathbf{P}^\top((T-t)\mathbf{P}\boldsymbol{\Sigma}\mathbf{P}^\top + T\boldsymbol{\Omega})^{-1} = (\mathbf{I}_N + t\boldsymbol{\beta}_2(t))\boldsymbol{\beta}_1$$

where

$$\boldsymbol{\beta}_1 = \frac{1}{T}\boldsymbol{\Sigma}\mathbf{P}^\top(\mathbf{P}\boldsymbol{\Sigma}\mathbf{P}^\top + \boldsymbol{\Omega})^{-1}$$

and

$$\boldsymbol{\beta}_2(t) = \boldsymbol{\Sigma}\mathbf{P}^\top((T-t)\mathbf{P}\boldsymbol{\Sigma}\mathbf{P}^\top + T\boldsymbol{\Omega})^{-1}\mathbf{P}. \tag{EC.6}$$

Recalling (EC.3), it can be shown after a bit of algebra that (EC.5) and hence the drift of the conditional process  $d\mathbf{X}(t) | \mathbf{Y}(0, T) = \mathbf{y}$  is

$$\mathbb{E}[\mathbf{X}(t+dt) - \mathbf{X}(t) | \mathbf{X}(t) = \mathbf{x}, \mathbf{Y}(0, T) = \mathbf{y}] = dt(\boldsymbol{\mu}^x + \boldsymbol{\beta}_1(\mathbf{y} - T\mathbf{P}\boldsymbol{\mu}^x) - \boldsymbol{\beta}_2(t)(\mathbf{X}(t) - \mathbb{E}[\mathbf{X}(t) | \mathbf{y}])),$$

where  $\mathbb{E}[\mathbf{X}(t) | \mathbf{Y}(0, T) = \mathbf{y}] = t\boldsymbol{\mu}^x + \boldsymbol{\beta}_1(\mathbf{y} - T\mathbf{P}\boldsymbol{\mu}^x)$ . Since  $\mathbf{X}(t)$  is continuous and has finite increments, by taking the limit as  $dt \rightarrow 0$ , we obtain

$$\mathbb{E}[d\mathbf{X}(t) | \mathbf{X}(t) = \mathbf{x}, \mathbf{Y}(0, T) = \mathbf{y}] = dt(\boldsymbol{\mu}^x + \boldsymbol{\beta}_1(\mathbf{y} - T\mathbf{P}\boldsymbol{\mu}^x) - \boldsymbol{\beta}_2(t)(\mathbf{X}(t) - \mathbb{E}[\mathbf{X}(t) | \mathbf{y}])). \tag{EC.7}$$

**Covariance of the conditional dynamics.** A similar argument shows that the covariance of the conditional dynamics is

$$\begin{aligned} \mathbb{V}[\mathbf{X}(t+dt) | \mathbf{X}(t) = \mathbf{x}, \mathbf{Y}(0, T) = \mathbf{y}] &= \mathbb{V}[\mathbf{X}(t+dt) | \mathbf{Z} = \mathbf{z}] \\ &= \mathbb{V}[\mathbf{X}(t+dt)] - \text{Cov}(\mathbf{X}(t+dt), \mathbf{Z})\mathbb{V}[\mathbf{Z}]^{-1}\text{Cov}(\mathbf{X}(t+dt), \mathbf{Z})^\top \\ &= (dt)\boldsymbol{\Sigma} - (dt)^2 \cdot \boldsymbol{\Sigma}\mathbf{P}^\top((T-t)\mathbf{P}\boldsymbol{\Sigma}\mathbf{P}^\top + T\boldsymbol{\Sigma})^{-1}\mathbf{P}\boldsymbol{\Sigma} \\ &= (dt)\boldsymbol{\Sigma} + o(dt). \end{aligned}$$

By taking the limit as  $dt \rightarrow 0$ , we get

$$\mathbb{V}[d\mathbf{X}(t) | \mathbf{X}(t) = \mathbf{x}, \mathbf{Y}(0, T) = \mathbf{y}] = (dt)\boldsymbol{\Sigma} + o(dt). \quad (\text{EC.8})$$

Since  $\mathbf{X}(t)$  has finite increments, equations (EC.7) and (EC.8) are well defined and they characterize the drift and volatility of the conditional process  $d\mathbf{X}(t) | (\mathbf{X}(t), \mathbf{Y}(0, T) = \mathbf{y})$ . We now derive the SDE that is satisfied by the process  $\mathbf{X}(t) | \mathbf{Y}(0, T) = \mathbf{y}$ .

### EC.1.3. SDE of the conditional log-returns process

We now show that the conditional process  $\mathbf{X}(t) | \mathbf{Y}(0, T) = \mathbf{y}$  is the solution to an SDE with drift (EC.7) and volatility (EC.8). We first define

$$\boldsymbol{\beta}_3(t) = t\left(\boldsymbol{\mu}^x + \boldsymbol{\beta}_1(\mathbf{Y}(0, T) - T\mathbf{P}\boldsymbol{\mu}^x)\right) - \int_0^t \boldsymbol{\beta}_2(s)(\mathbf{X}(s) - \mathbb{E}[\mathbf{X}(s) | \mathbf{Y}(0, T)]) ds, \text{ for } t \in [0, T].$$

By showing that

$$\mathbf{W}^y(t) = \mathbf{X}(t) - \boldsymbol{\beta}_3(t)$$

is a Brownian motion in the enlarged filtration  $\mathcal{F}_t^{\mathbf{Y}} := \sigma(\mathcal{F}_t \vee \sigma(\mathbf{Y}(0, T)))$ , we obtain

$$d\mathbf{W}^y(t) = d\mathbf{X}(t) | \mathbf{y} - d\boldsymbol{\beta}_3(t), \text{ for } t \in [0, T]$$

which gives the SDE representation of  $\mathbf{X}(t) | \mathbf{Y}(0, T) = \mathbf{y}$ .

To prove that  $\mathbf{W}^y(t)$  is a Brownian motion in the filtration  $\mathcal{F}_t^{\mathbf{Y}}$ , we refer to Levy's Characterization of a Brownian motion (see for example [Durrett \(1996;2018;\)](#)).

**THEOREM EC.1 (Levy's characterization of a Brownian motion).** *Let the stochastic process  $\mathbf{W}^y = (W_1^y, \dots, W_N^y)$  be a  $N$ -dimensional local continuous martingale with  $\mathbf{W}^y(0) = \mathbf{0}$ . Then, the following is equivalent:*

1.  $\mathbf{W}^y$  is a Brownian motion on the underlying filtered probability space with  $\mathbf{W}^y(t) \sim \mathcal{N}(\mathbf{0}, t\boldsymbol{\Sigma})$ .
2.  $\mathbf{W}^y$  has quadratic covariations  $[W_i^y(t), W_j^y(t)] = \Sigma_{ij}t$  for  $1 \leq i, j \leq N$ .

Since  $\mathbf{X}(t)$  and  $\beta_3(t)$  are both continuous,  $\mathbf{W}^y$  is also continuous. Now we show that it is a local martingale in the filtration  $\mathcal{F}_t^{\mathbf{Y}}$ , that is for  $s \leq t$

$$\mathbb{E}[\mathbf{W}^y(t) - \mathbf{W}^y(s) | \mathcal{F}_s^{\mathbf{Y}}] = \mathbf{0}.$$

We first have

$$\begin{aligned} \mathbb{E}[\mathbf{X}(t) - \mathbf{X}(s) | \mathcal{F}_s^{\mathbf{Y}}] &\stackrel{(a)}{=} \mathbb{E}[\mathbf{X}(t) - \mathbf{X}(s) | \mathbf{X}(s), \mathbf{Y}(0, T)] \\ &\stackrel{(b)}{=} (t-s)(\boldsymbol{\mu}^x + \beta_1(\mathbf{y} - T\mathbf{P}\boldsymbol{\mu}^x) - \beta_2(s)(\mathbf{X}(s) - \mathbb{E}[\mathbf{X}(s) | \mathbf{Y}(0, T)])) \end{aligned}$$

where (a) follows from the Markov property of  $\mathbf{X}(t)$  and (b) is derived from (EC.5). It follows that

$$\begin{aligned} \mathbb{E}[\mathbf{W}^y(t) - \mathbf{W}^y(s) | \mathcal{F}_s^{\mathbf{Y}}] &= \mathbb{E}[\mathbf{W}^y(t) - \mathbf{W}^y(s) | \mathbf{X}(s), \mathbf{Y}(0, T)] \\ &= \mathbb{E}[\mathbf{X}(t) - \mathbf{X}(s) | \mathbf{X}(s), \mathbf{Y}(0, T)] - \mathbb{E}[\beta_3(t) - \beta_3(s) | \mathbf{X}(s), \mathbf{Y}(0, T)] \\ &= \underbrace{-(t-s)\beta_2(s)(\mathbf{X}(s) - \mathbb{E}[\mathbf{X}(s) | \mathbf{Y}(0, T)])}_{RHS_1} \\ &\quad + \underbrace{\mathbb{E}\left[\int_s^t \beta_2(u)(\mathbf{X}(u) - \mathbb{E}[\mathbf{X}(u) | \mathbf{Y}(0, T)])du\right] | \mathbf{X}(s), \mathbf{Y}(0, T)}_{RHS_2}. \end{aligned}$$

By Fubini's theorem, the second term of the right-hand side

$$\begin{aligned} RHS_2 &= \int_s^t \beta_2(u) \mathbb{E}\left[\left(\mathbf{X}(u) - \mathbb{E}[\mathbf{X}(u) | \mathbf{Y}(0, T)]\right) \middle| \mathbf{X}(s), \mathbf{Y}(0, T)\right] du \\ &= \int_s^t \beta_2(u) \left(\mathbb{E}[\mathbf{X}(u) | \mathbf{X}(s), \mathbf{Y}(0, T)] - \mathbb{E}[\mathbf{X}(u) | \mathbf{Y}(0, T)]\right) du \\ &\stackrel{(c)}{=} \int_s^t \beta_2(u) \left(\mathbf{I}_N + (u-s)\beta_2(s)\right) \left(\mathbf{X}(s) - \mathbb{E}[\mathbf{X}(s) | \mathbf{Y}(0, T)]\right) du \\ &= \left\{ \int_s^t \beta_2(u) \left(\mathbf{I}_N + (u-s)\beta_2(s)\right) du \right\} \left(\mathbf{X}(s) - \mathbb{E}[\mathbf{X}(s) | \mathbf{Y}(0, T)]\right) \end{aligned}$$

where (c) can be obtained (after a bit of algebra) from

$$\mathbb{E}[\mathbf{X}(u) | \mathbf{X}(s), \mathbf{Y}(0, T)] = \mathbf{X}(s) + (u-s) \cdot (\boldsymbol{\mu}^x + \beta_1(\mathbf{y} - T\mathbf{P}\boldsymbol{\mu}^x) - \beta_2(s)(\mathbf{X}(s) - \mathbb{E}[\mathbf{X}(s) | \mathbf{Y}(0, T)]))$$

and

$$\mathbb{E}[\mathbf{X}(u) | \mathbf{Y}(0, T) = \mathbf{y}] = u\boldsymbol{\mu}^x + \beta_1(\mathbf{y} - T\mathbf{P}\boldsymbol{\mu}^x).$$

By showing

$$\beta_2(u)(\mathbf{I}_N + (u-s)\beta_2(s)) = \beta_2(s), \quad \forall u \geq s$$

we will have  $RHS_1 + RHS_2 = 0$  and hence

$$\mathbb{E}[\mathbf{W}^y(t) - \mathbf{W}^y(s) | \mathcal{F}_s^{\mathbf{Y}}] = \mathbf{0}$$

and  $\mathbf{W}^y(t)$  will be a local martingale in  $\mathcal{F}_t^{\mathbf{Y}}$ .

Recall from [EC.6](#) that

$$\beta_2(u) = \Sigma \mathbf{P}^\top ((T-u)\mathbf{P}\Sigma\mathbf{P}^\top + T\Omega)^{-1} \mathbf{P}, \quad \forall u \geq 0.$$

It follows that for  $0 \leq s \leq u \leq T$

$$\beta_2(u) = \Sigma \mathbf{P}^\top ((T-s)\mathbf{P}\Sigma\mathbf{P}^\top + T\Omega - (u-s)\mathbf{P}\Sigma\mathbf{P}^\top)^{-1} \mathbf{P}.$$

Woodbury's identity implies

$$\beta_2(u) = \beta_2(s) + (u-s)\beta_2(s)(\mathbf{I}_N - (u-s)\beta_2(s))^{-1}\beta_2(s) = \beta_2(s)(\mathbf{I}_N - (u-s)\beta_2(s))^{-1}$$

which gives

$$\beta_2(u)(\mathbf{I}_N + (u-s)\beta_2(s)) = \beta_2(s), \quad \forall u \geq s$$

and hence

$$\mathbb{E}[\mathbf{W}^y(t) - \mathbf{W}^y(s) | \mathcal{F}_s^{\mathbf{Y}}] = \mathbf{0}, \quad \forall 0 \leq s \leq t \leq T,$$

so  $\mathbf{W}^y$  is a local martingale in the filtration  $\mathcal{F}_t^{\mathbf{Y}}$ .

It follows from [\(EC.8\)](#) that the quadratic variation of  $\mathbf{W}^y$  satisfies

$$[W_i^y(t), W_j^y(t)] = \Sigma_{ij} t, \quad \text{for } 1 \leq i, j \leq N.$$

Thus, by [Theorem EC.1](#),  $\mathbf{W}^y$  is a Brownian motion with respect to the filtration  $\mathcal{F}_t^{\mathbf{Y}}$ .

It follows from [\(EC.7\)](#) – [\(EC.8\)](#) that

$$\mathbf{X}(t) | \mathbf{y} = \mathbf{W}^y(t) + \beta_3(t) | \mathbf{y},$$

and

$$\begin{aligned} d\mathbf{X}(t) | \mathbf{y} &= d\mathbf{W}^y(t) + d\beta_3(t) | \mathbf{y} \\ &= dt(\boldsymbol{\mu}^x + \beta_1(\mathbf{y} - T\mathbf{P}\boldsymbol{\mu}^x) - \beta_2(t)(\mathbf{X}(t) | \mathbf{y} - \mathbb{E}[\mathbf{X}(t) | \mathbf{y}])) + d\mathbf{W}^y(t). \end{aligned}$$

#### EC.1.4. Conditional Price Process

The stock price process can be obtained directly from the log-returns by noting that

$$\mathbf{S}(t) | (\mathbf{Y}(0, T) = \mathbf{y}) = \mathbf{S}(0) \exp(\mathbf{X}(t) | (\mathbf{Y}(0, T) = \mathbf{y})). \quad (\text{EC.9})$$

We apply Itô's lemma to [\(EC.9\)](#). For  $i \in [N]$ , we have

$$\begin{aligned} dS_i(t) | \mathbf{y} &= S_i(0)e^{X_i(t) | \mathbf{y}} dX_i(t) | \mathbf{y} + \frac{1}{2} S_i(0)e^{X_i(t) | \mathbf{y}} (dX_i(t) | \mathbf{y})^2 \\ &= S_i(t) | \mathbf{y} \cdot (dX_i(t) | \mathbf{y} + (dX_i(t) | \mathbf{y})^2), \end{aligned}$$

with

$$(dX_i(t) | \mathbf{y})^2 = (dW_i^y(t))^2 = \sigma_i^2 dt.$$

Therefore, the conditional dynamics of asset prices are

$$\begin{aligned} d\mathbf{S}(t) | \mathbf{y} &= \mathbf{D}(\mathbf{S}(t) | \mathbf{y})(d\mathbf{X}(t) | \mathbf{y} + \frac{1}{2} \text{diag}(\boldsymbol{\Sigma})dt) \\ &= \mathbf{D}(\mathbf{S}(t) | \mathbf{y})(\tilde{\boldsymbol{\mu}}(t, \mathbf{X}(t) | \mathbf{y})dt + d\mathbf{W}^y(t)), \end{aligned}$$

with drift

$$\begin{aligned} \tilde{\boldsymbol{\mu}}(t, \mathbf{x}) &= \boldsymbol{\mu}^x + \boldsymbol{\beta}_1(\mathbf{y} - T\mathbf{P}\boldsymbol{\mu}^x) - \boldsymbol{\beta}_2(t)(\mathbf{x} - \mathbb{E}[\mathbf{X}(t) | \mathbf{y}]) + \frac{1}{2} \text{diag}(\boldsymbol{\Sigma}) \\ &= \boldsymbol{\mu} + \boldsymbol{\beta}_1(\mathbf{y} - T\mathbf{P}\boldsymbol{\mu}^x) - \boldsymbol{\beta}_2(t)(\mathbf{x} - \mathbb{E}[\mathbf{X}(t) | \mathbf{y}]). \end{aligned}$$

This completes the proof.  $\square$

### EC.1.5. Novikov's condition

For (14) to define a change of measure we require  $\mathbb{E}_{\mathbb{P}} \left[ \frac{dQ}{dP} \right] = 1$ . A sufficient condition is Novikov's condition (see, e.g., Lemma 8.6.2 in [Øksendal \(2003\)](#))

$$\mathbb{E}_{\mathbb{P}} \left[ \exp \left( \frac{1}{2} \int_0^T |\mathbf{k}(t)|^2 dt \right) \right] < \infty.$$

Define

$$\tilde{\mathbf{X}}(t) := \mathbf{X}^y(t) - \mathbb{E}[\mathbf{X}^y(t)].$$

From (11),  $\tilde{\mathbf{X}}(t)$  satisfies the SDE

$$d\tilde{\mathbf{X}}(t) = -\boldsymbol{\beta}_2(t)\tilde{\mathbf{X}}(t) dt + d\mathbf{W}(t), \quad \tilde{\mathbf{X}}(0) = \mathbf{0}. \quad (\text{EC.10})$$

Moreover, since

$$\boldsymbol{\beta}_2(t) = \boldsymbol{\Sigma}\mathbf{P}^\top \left( (T-t)\mathbf{P}\boldsymbol{\Sigma}\mathbf{P}^\top + T\boldsymbol{\Omega} \right)^{-1} \mathbf{P}$$

is bounded on  $[0, T]$ , there exists a constant  $M > 0$  such that

$$|\boldsymbol{\beta}_2(t)| \leq M, \quad \forall t \in [0, T].$$

Thus, we get

$$|\mathbf{k}(t)|^2 \leq 2|\boldsymbol{\beta}_1(\mathbf{y} - T\mathbf{P}\boldsymbol{\mu}^x)|^2 + 2|\boldsymbol{\beta}_2(t)|^2 |\tilde{\mathbf{X}}(t)|^2 \leq 2M^2 |\tilde{\mathbf{X}}(t)|^2.$$

The Novikov condition reduces to showing that

$$\mathbb{E}_{\mathbb{P}} \left[ \exp \left( M^2 \int_0^T |\tilde{\mathbf{X}}(t)|^2 dt \right) \right] < \infty.$$

The solution to (EC.10) is given by

$$\tilde{\mathbf{X}}(t) = \exp\left(-\int_0^t \beta_2(s) ds\right) \int_0^t \exp\left(\int_0^s \beta_2(r) dr\right) d\mathbf{W}(s),$$

which shows that  $\tilde{\mathbf{X}}(t)$  is a zero-mean Gaussian process with uniformly bounded variance (see, e.g., Øksendal (2003), Revuz and Yor (1999)). Thus, the quadratic function  $\int_0^T |\tilde{\mathbf{X}}(t)|^2 dt$  admits finite exponential moments. Thus, we conclude that

$$\mathbb{E}_{\mathbb{P}} \left[ \exp\left(\frac{1}{2} \int_0^T |\mathbf{k}(t)|^2 dt\right) \right] < \infty,$$

which verifies the Novikov condition. □

## EC.2. Section 4

### EC.2.1. Proof of Proposition 3

Let  $W(t) \in \mathbb{R}$  be a standard Brownian motion with variance  $\mathbb{V}[W(t)] = t$  and initial value  $W(0) = a$ . At time  $t = 0$ , we observe a sample  $y$  of the random variable  $Y(0, T) = W(T) + \epsilon$  where  $\epsilon \sim \mathcal{N}(0, T\omega^2)$  is independent of  $W$ . The following result shows that the conditional process  $\{B(t) = (W(t) | Y(0, T) = y), t \in [0, T]\}$  is a restriction of a Brownian bridge from  $a$  to  $y$  with hitting time  $\tilde{T} = T(1 + \omega^2)$  to the interval  $[0, T]$ .

From Proposition 2, a process  $B(t)$  is defined as a Brownian bridge from  $a$  to  $y$  with hitting time  $\tilde{T} = T(1 + \omega^2)$  if it satisfies

1.  $B(0) = a$ , and  $B(\tilde{T}) = y$  (with probability 1),
2.  $\{B(t), t \in [0, \tilde{T}]\}$  is a Gaussian process,
3.  $\mathbb{E}[B(t)] = a + \frac{t}{\tilde{T}}(y - a)$  for  $t \in [0, \tilde{T}]$ ,
4.  $\text{Cov}(B(t), B(s)) = \min\{s, t\} - \frac{st}{\tilde{T}}$ , for  $s, t \in [0, \tilde{T}]$ ,
5. With probability 1,  $t \rightarrow B(t)$  is continuous in  $[0, \tilde{T}]$ .

We now prove that  $B(t) = (W(t) | Y(0, T) = y)$  satisfies the above properties for  $t \in [0, T]$ .

We first have  $B(0) = W(0) = a$ , and since the vector  $(W(t), Y(0, T))$  is jointly Gaussian, the conditional process  $B(t) = (W(t) | Y(0, T))$  is normally distributed and satisfies 2. It is therefore fully identified by its mean and variance, and we have

$$\begin{aligned} \mathbb{E}[B(t)] &= \mathbb{E}[W(t) | Y(0, T) = y] \\ &= \mathbb{E}[W(t)] + \text{Cov}(W(t), Y(0, T)) \mathbb{V}^{-1}[Y(0, T)](y - \mathbb{E}[Y(0, T)]) \\ &= a + \frac{t}{\tilde{T}}(y - a), \text{ for } t \in [0, T], \end{aligned}$$

with  $\tilde{T} = T(1 + \omega^2)$ . Thus,  $B(t)$  satisfies 3. Now let  $s, t \in \mathbb{R}$  with  $s \leq t$ , we have

$$\begin{aligned} \text{Cov}(B(t), B(s)) &= \text{Cov}(W(t), W(s) | Y(0, T) = y) \\ &= \mathbb{E}[W(t)W(s) | Y(0, T) = y] - \mathbb{E}[W(s) | Y(0, T) = y] \mathbb{E}[W(t) | Y(0, T) = y], \end{aligned} \tag{EC.11}$$

by the law of total expectation we get

$$\mathbb{E}[W(t)W(s) | Y(0, T) = y] = \mathbb{E}[W(s)\mathbb{E}[W(t) | W(s), Y(0, T) = y] | Y(0, T) = y].$$

Since  $W(t)$  and  $Y(0, T)$  are jointly Gaussian, we write

$$\begin{aligned} \mathbb{E}[W(t) | W(s), Y(0, T) = y] &= \mathbb{E}[W(t) | W(s)] \\ &\quad + \text{Cov}(W(t), Y(0, T) | W(s)) \mathbb{V}[Y(0, T) | W(s)]^{-1} \\ &\quad \cdot [y - \mathbb{E}(Y(0, T) | W(s))] \\ &= W(s) + \frac{t-s}{T(1+\omega^2) - s} (y - W(s)) \\ &= \frac{\tilde{T} - t}{\tilde{T} - s} W(s) + \frac{t-s}{\tilde{T} - s} y. \end{aligned}$$

Therefore, the conditional expectation of the product  $W(t)W(s)$  is

$$\mathbb{E}[W(t)W(s) | Y(0, T) = y] = \frac{\tilde{T} - t}{\tilde{T} - s} \mathbb{E}[W^2(s) | Y(0, T) = y] + \frac{t-s}{\tilde{T} - s} y \cdot \mathbb{E}[W(s) | Y(0, T) = y]. \quad (\text{EC.12})$$

It follows (EC.11) and (EC.12) that

$$\text{Cov}(B(t), B(s)) = \min\{s, t\} - \frac{st}{\tilde{T}}, \text{ for } t \in [0, T],$$

and  $B(t)$  satisfies 4. This implies that  $\mathbb{V}[B(\tilde{T})] = 0$  so by 3,  $B(\tilde{T}) = y$ . Since  $W(t)$  has continuous sample paths, so too does  $B(t)$  and hence 5 holds. Therefore,  $\{B(t) = (W(t) | Y(0, T) = y), t \in [0, T]\}$  is a restriction of a Brownian bridge from  $a$  to  $y$  with hitting time  $\tilde{T} = T(1 + \omega^2)$  to the interval  $[0, T]$ . This concludes the proof.  $\square$

### EC.2.2. Example 2: Detailed calculations

Let  $W_1(t)$  and  $W_2(t)$  be two standard Brownian motions with correlation  $\rho \in (0, 1]$ . It can easily be shown that there exist a standard Brownian motion  $W_3(t)$  such that:

1.  $W_3(t)$  is independent of  $W_1(t)$ ,
2.  $W_2(t) = \rho W_1(t) + \sqrt{1 - \rho^2} W_3(t)$ .

Given a view  $y_2$  sampled from  $Y_2(0, T) = W_2(T) + \epsilon$  where  $\epsilon$  is zero-mean Gaussian and with variance  $\omega^2$  and independent of  $W_2(t)$ , we show that the two processes  $B_1(t) = (W_1(t) | Y_2(0, T) = y_2)$  and  $B_2(t) = (W_2(t) | Y_2(0, T) = y_2)$  are Brownian bridges restricted to the interval  $[0, T]$ . The latter is directly deduced from Proposition 3, where  $B_2(t) = (W_2(t) | Y_2(0, T) = y_2)$  is a restriction of a Brownian bridge from 0 to  $y_2$  with hitting time  $\tilde{T}_2 = T + \omega^2$  to  $[0, T]$ . Here, we prove the same for  $\{B_1(t), t \in [0, T]\}$ .

We start by showing how the view  $y_2$  of the Brownian motion  $W_2(T)$  can be transformed to a view  $y_1$  about the Brownian motion  $W_1(T)$ . Consider the random variable  $Y_1(0, T)$  derived from  $Y_2(0, T)$  such that

$$Y_1(0, T) = \frac{1}{\rho} Y_2(0, T).$$

We have

$$\begin{aligned} Y_1(0, T) &= \frac{1}{\rho} (W_2(T) + \epsilon) \\ &\stackrel{(a)}{=} W_1(T) + \frac{\sqrt{1-\rho^2}}{\rho} W_3(T) + \frac{1}{\rho} \epsilon \\ &= W_1(T) + \bar{\epsilon}, \end{aligned}$$

where (a) follows from the decomposition of the Brownian motion  $W_2(t)$  into  $W_1(t)$  and  $W_3(t)$ , and

$$\bar{\epsilon} \sim \mathcal{N}\left(0, \frac{\omega^2 + (1-\rho^2)T}{\rho^2}\right)$$

is the noise term in the view  $Y_1(0, T)$ . Therefore, we have

$$\begin{aligned} B_1(t) &= W_1(t) \mid (Y_2(0, T) = y_2) \\ &= W_1(t) \mid (Y_1(0, T) = y_1). \end{aligned}$$

From Proposition 3, the conditional process  $B_1(t) = (W_1(t) \mid Y_1(0, T) = y_1)$  is a Brownian bridge from 0 to  $y_1$  with hitting time  $\tilde{T}_1$  restricted to the interval  $[0, T]$ , with

$$\begin{aligned} \tilde{T}_1 &= T + \mathbb{V}[\bar{\epsilon}] \\ &= \frac{\omega^2 + T}{\rho^2}. \end{aligned}$$

When  $\rho = 0$ , notice that  $W_1(t)$  and  $Y_2(0, T)$  are independent, and therefore

$$\begin{aligned} B_1(t) &= W_1(t) \mid (Y_2(0, T) = y_2) \\ &= W_1(t), \end{aligned}$$

this is also equivalent to having  $\tilde{T}_1 = \infty$  (notice that a Brownian bridge with infinite hitting time is a Brownian motion).  $\square$

### EC.2.3. Example 2: Plots

Figure EC.1a compares the hitting times of both Brownian bridges for a fixed level of view uncertainty ( $\omega^2 = 4$ ). The hitting time of the Brownian bridge for asset 2 is  $\tilde{T}_2 = T + \omega^2 = 14$ , and that of asset 1 depends on the correlation between the two assets. When they are independent ( $\rho = 0$ ), the hitting time  $\tilde{T}_1$  is infinite because the view on asset 2 provides no information about asset 1. In this case, the Bb for asset 1 remains a Brownian motion. As the correlation between the two processes increases, the difference between the hitting times  $\tilde{T}_1$  and  $\tilde{T}_2$  diminishes because the view

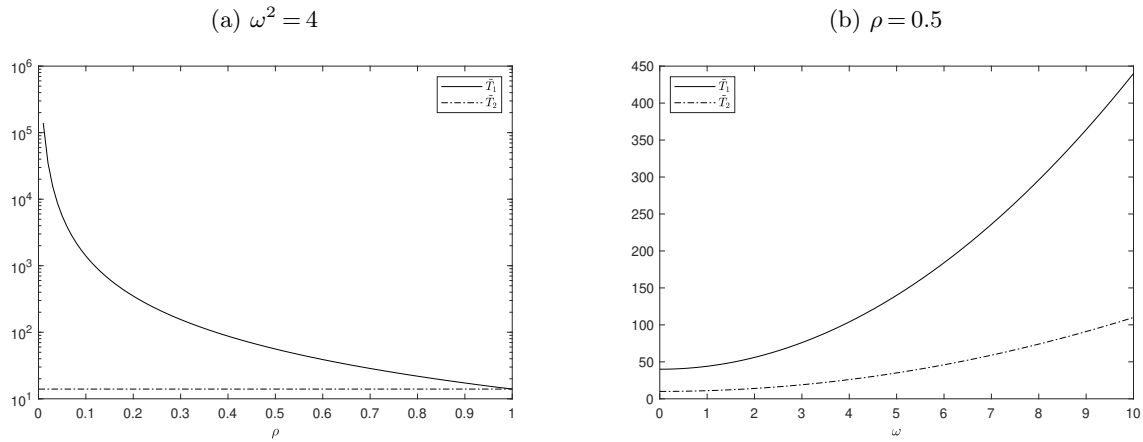

**Figure EC.1** Impact of the noise in the view and correlation on the hitting time of the Bb. Comparison of the hitting times of the two Brownian bridges. (a) Varying correlation  $\rho$  with fixed noise  $\omega^2 = 4$ . (b) Varying noise  $\omega^2$  with fixed correlation  $\rho = 0.5$ .

of asset 2 provides information about asset 1. When the two assets are perfectly correlated ( $\rho = 1$ ) the hitting times are equal.

In figure EC.1b, we fix the correlation coefficient  $\rho$  to be 0.5, and compare the hitting times of the Brownian bridges for varying degrees of uncertainty in the view ( $\omega^2 \in [0, 10^2]$ ). When the view is certain ( $\omega^2 = 0$ ),  $\tilde{T}_2 = T$  as the terminal value of asset 2 is fixed.  $\tilde{T}_1$  is always greater than  $T$  due to the imperfect correlation between the two assets. As we increase the view uncertainty,  $\tilde{T}_1$  increases at a faster rate than  $\tilde{T}_2$ ; The information about asset 1 disappears faster than the information about asset 2 due to the correlation between the two assets being less than 1.

#### EC.2.4. Proof of Proposition 4

Let  $\mathbf{W}(t)$  be an  $N$ -dimensional Brownian motion starting at  $\mathbf{a} \in \mathbb{R}^N$  with

$$\mathbf{W}(t) \sim \mathcal{N}(\mathbf{a}, t\mathbf{\Sigma}).$$

At  $t = 0$ , we have  $\mathbf{Y}(0, T) = \mathbf{y}$  where

$$\mathbf{Y}(0, T) = \mathbf{P}\mathbf{W}(T) + \boldsymbol{\epsilon},$$

$\mathbf{P} \in \mathbb{R}^{K \times N}$  is a linear mapping such that  $\mathbf{P}\mathbf{L}_j \neq \mathbf{0}$  for  $j \in [N]$ , and  $\boldsymbol{\epsilon}$  is normally distributed with  $\boldsymbol{\epsilon} \sim \mathcal{N}(\mathbf{0}, T\mathbf{\Omega})$ . We define the conditional process  $\mathbf{B}(t) \in \mathbb{R}^N$  as the Brownian motion  $\mathbf{W}(t)$  conditioned on the forward-looking views  $\mathbf{Y}(0, T) = \mathbf{y}$

$$\mathbf{B}(t) = \mathbf{W}(t) | (\mathbf{Y}(0, T) = \mathbf{y}), \text{ for } t \in [0, T].$$

Since the vector  $(\mathbf{W}(t), \mathbf{Y}(0, T))$  is Gaussian, the conditional process  $\mathbf{B}(t)$  is also Gaussian, and with probability 1, we have

$$\mathbf{B}(0) = \mathbf{W}(0) | (\mathbf{Y}(0, T) = \mathbf{y}) = \mathbf{a}.$$

Additionally, the conditional expectation is

$$\begin{aligned} \mathbb{E}[\mathbf{B}(t)] &= \mathbb{E}[\mathbf{W}(t) | \mathbf{Y}(0, T) = \mathbf{y}] \\ &= \mathbb{E}[\mathbf{W}(t)] + \text{Cov}(\mathbf{W}(t), \mathbf{Y}(0, T))\mathbb{V}^{-1}[\mathbf{Y}(0, T)](\mathbf{y} - \mathbb{E}[\mathbf{Y}(0, T)]) \\ &= \mathbf{a} + \frac{t}{T}\boldsymbol{\Sigma}\mathbf{P}^\top(\mathbf{P}\boldsymbol{\Sigma}\mathbf{P}^\top + \boldsymbol{\Omega})^{-1}(\mathbf{y} - \mathbf{P}\mathbf{a}). \end{aligned}$$

For  $s, t \in \mathbb{R}$  with  $s \leq t$ , the covariance between  $\mathbf{B}(t)$  and  $\mathbf{B}(s)$  is

$$\begin{aligned} \text{Cov}(\mathbf{B}(t), \mathbf{B}(s)) &= \text{Cov}(\mathbf{W}(t), \mathbf{W}(s) | \mathbf{Y}(0, T) = \mathbf{y}) \\ &= \text{Cov}(\mathbf{W}(t), \mathbf{W}(s)) - \text{Cov}(\mathbf{W}(t), \mathbf{Y}(0, T))\mathbb{V}^{-1}[\mathbf{Y}(0, T)]\text{Cov}(\mathbf{Y}(0, T), \mathbf{W}(s)) \\ &= s\boldsymbol{\Sigma} - \frac{st}{T}\boldsymbol{\Sigma}\mathbf{P}^\top(\mathbf{P}\boldsymbol{\Sigma}\mathbf{P}^\top + \boldsymbol{\Omega})^{-1}\mathbf{P}\boldsymbol{\Sigma}. \end{aligned}$$

We define

$$\mathbf{H} := \frac{1}{T}(\mathbf{P}\mathbf{L})^\top(\mathbf{P}\boldsymbol{\Sigma}\mathbf{P}^\top + \boldsymbol{\Omega})^{-1}\mathbf{P}\mathbf{L} \in \mathbb{R}^{N \times N},$$

and recall that  $\boldsymbol{\Sigma} = \mathbf{L}\mathbf{L}^\top$ , thus

$$\begin{aligned} \text{Cov}(\mathbf{B}(t), \mathbf{B}(s)) &= s\boldsymbol{\Sigma} - \frac{st}{T}\boldsymbol{\Sigma}\mathbf{P}^\top(\mathbf{P}\boldsymbol{\Sigma}\mathbf{P}^\top + \boldsymbol{\Omega})^{-1}\mathbf{P}\boldsymbol{\Sigma} \\ &= \mathbf{L}(s\mathbf{I}_N - st\mathbf{H})\mathbf{L}^\top. \end{aligned}$$

As the covariance matrices  $\boldsymbol{\Sigma}$  and  $\boldsymbol{\Omega}$  are positive definite, and the linear mapping matrix  $\mathbf{P}$  satisfies the condition  $\mathbf{P}\mathbf{L}_i \neq \mathbf{0}$ , for  $i \in [N]$ , it is easy to see that for a non-zero vector  $\mathbf{z} \in \mathbb{R}^N$ , we have

$$\mathbf{z}^\top \mathbf{H} \mathbf{z} = \frac{1}{T}(\mathbf{P}\mathbf{L}\mathbf{z})^\top(\mathbf{P}\boldsymbol{\Sigma}\mathbf{P}^\top + \boldsymbol{\Omega})^{-1}\mathbf{P}\mathbf{L}\mathbf{z} \geq 0,$$

therefore,  $\mathbf{H}$  is positive semi-definite<sup>5</sup>. Finally, as the Brownian motion  $t \rightarrow W_i(t)$  is continuous for every  $i \in [N]$ , and the view  $\mathbf{y}$  is given at time 0 and expires at time  $T$  (the view causes no jumps in the interval  $(0, T)$ ), the process  $t \rightarrow B_i(t) = (W_i(t) | \mathbf{Y}(0, T) = \mathbf{y})$  is also continuous for  $t \in [0, T]$  and  $i \in [N]$ . This concludes the proof.  $\square$

### EC.2.5. Proof of Theorem 1

We define the stochastic process  $\{\bar{\mathbf{B}}(t), t \in [0, T]\}$  as

$$\bar{\mathbf{B}}(t) = \mathbf{L}^{-1}(\mathbf{B}(t) - \mathbb{E}[\mathbf{B}(t)]),$$

where  $\{\mathbf{B}(t), t \in [0, T]\}$  satisfies the properties in Theorem 2. It is easy to see that

<sup>5</sup> It is not positive definite as there can exist a vector  $\mathbf{z} \in \mathbb{R}^N$  such that  $\mathbf{z} \neq \mathbf{0}$  and  $\mathbf{P}\mathbf{L}\mathbf{z} = \mathbf{0}$ .

1.  $\bar{\mathbf{B}}(0) = \mathbf{0}$  (with probability 1),
2.  $\bar{\mathbf{B}}$  is a Gaussian process,
3.  $\mathbb{E}[\bar{\mathbf{B}}(t)] = \mathbf{0}$ , for  $t \in [0, T]$ ,
4.  $\text{cov}(\bar{B}_i(t), \bar{B}_j(s)) = \begin{cases} \min\{s, t\} - \frac{st}{\tilde{T}_i}, & \text{if } i = j, \\ -\frac{st}{H_{i,j}}, & \text{if } i \neq j, \end{cases}$
5. With probability 1,  $t \rightarrow \bar{B}_i(t)$  is continuous in  $[0, T]$  for  $i \in [N]$ .

It follows that each  $\bar{B}_i(t)$ , where  $i \in [N]$ , satisfies Definition 1 and is therefore a Brownian bridge from 0 to 0 with hitting time  $\tilde{T}_i$  restricted to the interval  $[0, T]$ . Thus

$$d\bar{B}_i(t) = \frac{y - \bar{B}_i(t)}{\tilde{T}_i - t} dt + dW_i^y(t), \text{ for } i \in [N].$$

However, these Brownian bridges are correlated with

$$\text{Cov}(\bar{B}_i(t), \bar{B}_j(t)) = -\frac{t^2}{\tilde{T}_{ij}} \text{ for } i \neq j, t \in [0, T]$$

so the SDE of the multidimensional  $\bar{\mathbf{B}}(t)$  is not obtained from “stacking” the marginals.

We now derive the SDE representation of  $\bar{\mathbf{B}}(t)$ . As in the proof of Proposition 1, we first derive the drift and volatility of  $d\bar{\mathbf{B}}(t)$ , then show that it admits an SDE representation. Let  $\mathbf{V}(t) = [V_1(t), \dots, V_N(t)]^\top$  be a vector of  $N$ -independent Brownian motions with

$$\mathbf{V}(t) \sim \mathcal{N}(\mathbf{0}, t\mathbf{I}_N),$$

and consider the forward-looking views

$$\bar{\mathbf{Y}}(0, T) = (\mathbf{PL})\mathbf{V}(T) + \boldsymbol{\epsilon},$$

where  $\boldsymbol{\epsilon} \sim \mathcal{N}(\mathbf{0}, T\boldsymbol{\Omega})$ . It can be easily proven that the process  $\bar{\mathbf{B}}(t)$  has the same distribution as the Brownian motion  $\mathbf{V}(t)$  conditioned on the views  $\bar{\mathbf{Y}}(0, T) = \mathbf{0}$

$$\bar{\mathbf{B}}(t) \stackrel{d}{=} \mathbf{V}(t) \mid (\bar{\mathbf{Y}}(0, T) = \mathbf{0}).$$

Conditional on  $\bar{\mathbf{B}}(t)$  at time  $t$

$$\begin{aligned} \mathbb{E}[\bar{\mathbf{B}}(t+dt) \mid \bar{\mathbf{B}}(t)] &= \mathbb{E}[\mathbf{V}(t+dt) \mid \mathbf{V}(t), \mathbf{Y}(0, T) = \mathbf{0}] \\ &= ((t+dt)\mathbf{I}_N \ t(\mathbf{PL})^\top) \left( \begin{array}{cc} t\mathbf{I}_N & t(\mathbf{PL})^\top \\ (t+dt)\mathbf{PL} & T((\mathbf{PL})(\mathbf{PL})^\top + \boldsymbol{\Omega}) \end{array} \right)^{-1} \begin{pmatrix} \mathbf{V}(t) \\ \mathbf{0} \end{pmatrix}. \end{aligned}$$

Further calculations show

$$\mathbb{E}[\bar{\mathbf{B}}(t+dt) \mid \bar{\mathbf{B}}(t)] = \bar{\mathbf{B}}(t) - \frac{dt}{T} (\mathbf{PL})^\top \left( (1 - \frac{t}{T}) \mathbf{P}\boldsymbol{\Sigma}\mathbf{P}^\top + \boldsymbol{\Omega} \right)^{-1} \mathbf{PL}\bar{\mathbf{B}}(t).$$

Defining

$$\bar{\beta}_2(t) = \frac{1}{T}(\mathbf{PL})^\top \left( (1 - \frac{t}{T})\mathbf{P}\Sigma\mathbf{P}^\top + \mathbf{\Omega} \right)^{-1} \mathbf{PL}$$

it follows that

$$\mathbb{E}[\bar{\mathbf{B}}(t+dt) - \bar{\mathbf{B}}(t) \mid \bar{\mathbf{B}}(t)] = -(dt)\bar{\beta}_2(t)\bar{\mathbf{B}}(t),$$

by continuity of  $\bar{\mathbf{B}}(t)$  we get by letting  $dt \rightarrow 0$

$$\mathbb{E}[d\bar{\mathbf{B}}(t) \mid \bar{\mathbf{B}}(t)] = -(dt)\bar{\beta}_2(t)\bar{\mathbf{B}}(t). \quad (\text{EC.13})$$

A similar argument shows that the covariance of  $\bar{\mathbf{B}}(t)$  is

$$\begin{aligned} \mathbb{V}[\bar{\mathbf{B}}(t+dt) - \bar{\mathbf{B}}(t) \mid \bar{\mathbf{B}}(t)] &= \mathbb{V}[\mathbf{V}(t+dt) \mid \mathbf{V}(t), \mathbf{Y}(0, T) = \mathbf{0}] \\ &= (t\mathbf{I}_N \ t(\mathbf{PL})^\top) \left( \begin{array}{cc} t\mathbf{I}_N & t(\mathbf{PL})^\top \\ (t+dt)\mathbf{PL} & T((\mathbf{PL})(\mathbf{PL})^\top + \mathbf{\Omega}) \end{array} \right)^{-1} \begin{pmatrix} t\mathbf{I}_N \\ t\mathbf{PL} \end{pmatrix} \\ &= (dt) \cdot \mathbf{I}_N + o(dt), \end{aligned}$$

thus, by letting  $dt \rightarrow 0$ , we get

$$\mathbb{V}[d\bar{\mathbf{B}}(t) \mid \bar{\mathbf{B}}(t)] = (dt)\mathbf{I}_N + o(dt). \quad (\text{EC.14})$$

We show that  $\bar{\mathbf{B}}(t)$  is a solution to a Stochastic Differential Equation where the drift (EC.13) and volatility (EC.14) using Levy's characterization of a Brownian motion as in Proposition 1. Recall that

$$\bar{\mathbf{B}}(t) = \mathbf{L}^{-1}(\mathbf{B}(t) - \mathbb{E}[\mathbf{B}(t)]).$$

Additionally, we can write

$$\begin{aligned} \mathbf{X}^y(t) &= t\boldsymbol{\mu}^x + \mathbf{W}(t) \mid (\mathbf{Y}(0, T) = \mathbf{y}) \\ &= t\boldsymbol{\mu}^x + \mathbf{B}(t) \end{aligned}$$

so

$$\bar{\mathbf{B}}(t) = \mathbf{L}^{-1}(\mathbf{X}^y(t) - \mathbb{E}[\mathbf{X}^y(t)]).$$

From (11), (EC.13), and (EC.14),  $\bar{\mathbf{B}}(t)$  satisfies

$$d\bar{\mathbf{B}}(t) = -dt \cdot \bar{\beta}_2(t)\bar{\mathbf{B}}(t)dt + d\mathbf{V}^y(t)$$

where  $\mathbf{V}^y(t) = \mathbf{L}^{-1}\mathbf{W}^y(t)$  is a vector of  $N$ -independent Brownian motions, which concludes the proof.  $\square$

**EC.2.6. Proof of Proposition 5**

Consider the conditional process  $\{\bar{\mathbf{B}}(t), t \in [0, T]\}$  satisfying (23), we showed in the proof of Theorem 1 that each element  $\bar{B}_i(t)$ ,  $i \in [N]$ , is the restriction to  $[0, T]$  of a Brownian bridge from 0 to 0 with hitting time

$$\tilde{T}_i = T((\mathbf{P}\mathbf{L}_i)^\top(\mathbf{P}\boldsymbol{\Sigma}\mathbf{P}^\top + \boldsymbol{\Omega})^{-1}\mathbf{P}\mathbf{L}_i)^{-1} > 0,$$

Since  $\boldsymbol{\Sigma}$  and  $\boldsymbol{\Omega}$  are positive definite, so too is  $(\mathbf{P}\boldsymbol{\Sigma}\mathbf{P}^\top + \boldsymbol{\Omega})^{-1}$ . Furthermore, as we assume that  $\mathbf{P}\mathbf{L}_i \neq \mathbf{0}$ , for  $i \in [N]$ , it follows that  $\tilde{T}_i < \infty$ . Now we show that the hitting times  $\tilde{T}_i$  are strictly larger than the views horizon  $T$ .

For  $i \in [N]$ , we have

$$\tilde{T}_i = \frac{1}{H_{ii}}$$

where

$$\begin{aligned} \mathbf{H} &= \frac{1}{T}(\mathbf{P}\mathbf{L})^\top(\mathbf{P}\boldsymbol{\Sigma}\mathbf{P}^\top + \boldsymbol{\Omega})^{-1}\mathbf{P}\mathbf{L} \\ &\stackrel{(a)}{=} \frac{1}{T}(\mathbf{I}_N - \mathbf{L}^{-1}(\boldsymbol{\Sigma}^{-1} + \mathbf{P}^\top\boldsymbol{\Omega}^{-1}\mathbf{P})^{-1}(\mathbf{L}^{-1})^\top) \end{aligned}$$

with (a) coming from the Woodbury matrix identity. Thus, the hitting time  $\tilde{T}_i$  can be written as

$$\frac{1}{\tilde{T}_i} = \frac{1}{T}(1 - \boldsymbol{\ell}_i^{-1}(\boldsymbol{\Sigma}^{-1} + \mathbf{P}^\top\boldsymbol{\Omega}^{-1}\mathbf{P})^{-1}(\boldsymbol{\ell}_i^{-1})^\top),$$

where  $\boldsymbol{\ell}_i^{-1}$  is the  $i^{\text{th}}$  row of  $\mathbf{L}^{-1}$ , the inverse of the Cholesky decomposition matrix. Since  $(\boldsymbol{\Sigma}^{-1} + \mathbf{P}^\top\boldsymbol{\Omega}^{-1}\mathbf{P})^{-1}$  is positive definite and  $\boldsymbol{\ell}_i^{-1} \neq \mathbf{0}$  (because  $\mathbf{L}^{-1}$  is invertible)

$$\boldsymbol{\ell}_i^{-1}(\boldsymbol{\Sigma}^{-1} + \mathbf{P}^\top\boldsymbol{\Omega}^{-1}\mathbf{P})^{-1}(\boldsymbol{\ell}_i^{-1})^\top > 0.$$

Therefore

$$\frac{1}{\tilde{T}_i} = \frac{1}{T}\left(1 - \boldsymbol{\ell}_i^{-1}(\boldsymbol{\Sigma}^{-1} + \mathbf{P}^\top\boldsymbol{\Omega}^{-1}\mathbf{P})^{-1}(\boldsymbol{\ell}_i^{-1})^\top\right) < \frac{1}{T}. \quad (\text{EC.15})$$

Since  $\tilde{T}_i > 0$  it follows that  $\tilde{T}_i > T$ , for  $i \in [N]$ .

We now show that the hitting times are increasing in the covariance matrix  $\boldsymbol{\Omega}$ . Consider two positive definite matrices  $\boldsymbol{\Omega}^1$  and  $\boldsymbol{\Omega}^2$  such that  $\boldsymbol{\Omega}^1 \succeq \boldsymbol{\Omega}^2$  (the matrix  $\boldsymbol{\Omega}^1 - \boldsymbol{\Omega}^2$  is positive semi-definite). Let  $\tilde{T}_i^1$  and  $\tilde{T}_i^2$  be their respective hitting times. We first have  $(\boldsymbol{\Omega}^2)^{-1} \succeq (\boldsymbol{\Omega}^1)^{-1}$ . Since  $\boldsymbol{\Sigma}$  is positive definite

$$(\boldsymbol{\Sigma}^{-1} + \mathbf{P}^\top(\boldsymbol{\Omega}^1)^{-1}\mathbf{P})^{-1} \succeq (\boldsymbol{\Sigma}^{-1} + \mathbf{P}^\top(\boldsymbol{\Omega}^2)^{-1}\mathbf{P})^{-1}$$

and hence

$$\boldsymbol{\ell}_i^{-1}(\boldsymbol{\Sigma}^{-1} + \mathbf{P}^\top(\boldsymbol{\Omega}^1)^{-1}\mathbf{P})^{-1}(\boldsymbol{\ell}_i^{-1})^\top \geq \boldsymbol{\ell}_i^{-1}(\boldsymbol{\Sigma}^{-1} + \mathbf{P}^\top(\boldsymbol{\Omega}^2)^{-1}\mathbf{P})^{-1}(\boldsymbol{\ell}_i^{-1})^\top, \text{ for } i \in [N].$$

It follows from (EC.15) that  $\tilde{T}_i^1 \geq \tilde{T}_i^2$ , for  $i \in [N]$ . Furthermore, if  $\boldsymbol{\Omega}^1 \succ \boldsymbol{\Omega}^2$  (the matrix  $\boldsymbol{\Omega}^1 - \boldsymbol{\Omega}^2$  is strictly positive definite)  $\tilde{T}_i^1 > \tilde{T}_i^2$ , for  $i \in [N]$ . This concludes the proof.  $\square$

**EC.2.7. Proof of the Results in Section 4.3**

Consider the log-returns process satisfying (8)

$$\mathbf{X}(t) = t\boldsymbol{\mu}^x + \mathbf{W}(t),$$

where  $\mathbf{W}(t) \sim \mathcal{N}(\mathbf{0}, t\boldsymbol{\Sigma})$  a  $N$ -dimensional Brownian motion. Let  $\mathbf{y}$  be the expert views vector sampled from (10). Conditional on  $\mathbf{Y}(0, T) = \mathbf{y}$ , we have

$$\begin{aligned} \mathbf{X}^y(t) &= \mathbf{X}(t) \mid (\mathbf{Y}(0, T) = \mathbf{y}) \\ &= t\boldsymbol{\mu}^x + \mathbf{W}(t) \mid (\mathbf{Y}(0, T) = \mathbf{y}) \\ &= t\boldsymbol{\mu}^x + \mathbf{B}(t), \end{aligned}$$

where  $\mathbf{B}(t)$  satisfies (22). From Theorem 1, we can write

$$\mathbf{B}(t) = \mathbb{E}[\mathbf{B}(t)] + \mathbf{L}\bar{\mathbf{B}}(t),$$

where  $\bar{\mathbf{B}}(t)$  is a zero mean stochastic process satisfying the SDE (23). Furthermore, we have

$$\begin{aligned} d\mathbf{X}^y(t) &= (dt)\boldsymbol{\mu}^x + d\mathbf{B}(t) \\ &\stackrel{(a)}{=} (dt)\boldsymbol{\mu}^x + (dt)\boldsymbol{\beta}_1(\mathbf{y} - T\mathbf{P}\boldsymbol{\mu}^x) + \mathbf{L}d\bar{\mathbf{B}}(t) \\ &= (dt)(\boldsymbol{\mu}^x + \boldsymbol{\beta}_1(\mathbf{y} - T\mathbf{P}\boldsymbol{\mu}^x) - \mathbf{L}\bar{\boldsymbol{\beta}}_2(t)\bar{\mathbf{B}}(t)) + \mathbf{L}d\mathbf{V}^y(t) \\ &\stackrel{(b)}{=} (dt)(\boldsymbol{\mu}^x + \boldsymbol{\beta}_1(\mathbf{y} - T\mathbf{P}\boldsymbol{\mu}^x) - \mathbf{L}\bar{\boldsymbol{\beta}}_2(t)\mathbf{L}^{-1}(\mathbf{B}(t) - \mathbb{E}[\mathbf{B}(t)])) + \mathbf{L}d\mathbf{V}^y(t), \end{aligned}$$

where (a) follows from (23) and (b) from (22). Since

$$\mathbf{X}^y(t) - \mathbb{E}[\mathbf{X}^y(t)] = \mathbf{B}(t) - \mathbb{E}[\mathbf{B}(t)],$$

and

$$\mathbf{L}\bar{\boldsymbol{\beta}}_2(t)\mathbf{L}^{-1} = \boldsymbol{\beta}_2(t),$$

the conditional log-returns is a solution to the following SDE

$$d\mathbf{X}^y(t) = (dt)(\boldsymbol{\mu}^x + \boldsymbol{\beta}_1(\mathbf{y} - T\mathbf{P}\boldsymbol{\mu}^x) - \boldsymbol{\beta}_2(t)(\mathbf{X}^y(t) - \mathbb{E}[\mathbf{X}^y(t)])) + \mathbf{L}d\mathbf{V}^y(t).$$

Since  $\mathbf{V}^y(t)$  is defined by  $\mathbf{L}\mathbf{V}^y(t) = \mathbf{W}^y(t)$  (see Equation (9)), it follows that

$$d\mathbf{X}^y(t) = (dt)(\boldsymbol{\mu}^x + \boldsymbol{\beta}_1(\mathbf{y} - T\mathbf{P}\boldsymbol{\mu}^x) - \boldsymbol{\beta}_2(t)(\mathbf{X}^y(t) - \mathbb{E}[\mathbf{X}^y(t)])) + d\mathbf{W}^y(t).$$

□

### EC.3. Section 5

#### EC.3.1. Proof of Value function and Proposition 6

We show that the value function (29) with  $\mathbf{A}(t) \in \mathbb{R}^{N \times N}$ ,  $\mathbf{b}(t) \in \mathbb{R}^N$ , and  $c(t)$  being solutions of (30)–(32) is the solution of the HJB equation (27).

The optimal policy is the maximizer in the HJB (27):

$$\boldsymbol{\pi}^*(t) = -\frac{\nabla_z V}{z \nabla_z^2 V} \boldsymbol{\Sigma}^{-1} (\tilde{\boldsymbol{\mu}}(t, \mathbf{x}) - r_f \mathbf{1}_N) - \frac{1}{z \nabla_z^2 V} \nabla_{\mathbf{x}, z}^2 V$$

where

$$\begin{aligned} \tilde{\boldsymbol{\mu}}(t, \mathbf{x}) &= \boldsymbol{\mu} + \boldsymbol{\beta}_1 (\mathbf{y} - T\mathbf{P}\boldsymbol{\mu}^x) - \boldsymbol{\beta}_2(t) (\mathbf{x} - \mathbb{E}[\mathbf{X}(t)|\mathbf{y}]) \\ &= \boldsymbol{\alpha}_t + \boldsymbol{\Sigma} \boldsymbol{\eta}_t \mathbf{x} \end{aligned}$$

with  $\boldsymbol{\eta}_t : [0, T] \rightarrow \mathbb{R}^{N \times N}$  is

$$\begin{aligned} \boldsymbol{\eta}_t &= -\boldsymbol{\Sigma}^{-1} \boldsymbol{\beta}_2(t) \\ &= -\mathbf{P}^\top ((T-t)\mathbf{P}\boldsymbol{\Sigma}\mathbf{P}^\top + T\boldsymbol{\Omega})^{-1} \mathbf{P} \end{aligned} \tag{EC.16}$$

and  $\boldsymbol{\alpha}_t : [0, T] \rightarrow \mathbb{R}^N$  is

$$\boldsymbol{\alpha}_t = \boldsymbol{\mu} + \boldsymbol{\beta}_1 (\mathbf{y} - T\mathbf{P}\boldsymbol{\mu}^x) - \boldsymbol{\Sigma} \boldsymbol{\eta}_t \mathbb{E}[\mathbf{X}^y(t)]. \tag{EC.17}$$

Observe that  $\boldsymbol{\eta}_t$  is a symmetric matrix. From (29), we have

$$\begin{cases} \frac{\partial V}{\partial t} &= (\frac{1}{2} \mathbf{x}^\top \mathbf{A}'(t) \mathbf{x} + \mathbf{x}^\top \mathbf{b}'(t) + c'(t)) V, \\ \nabla_z V &= \frac{1-\gamma}{z} V, \\ \nabla_{\mathbf{x}} V &= (\mathbf{A}(t) \mathbf{x} + \mathbf{b}(t)) V, \\ \nabla_z^2 V &= \frac{-\gamma(1-\gamma)}{z^2} V, \\ \nabla_{\mathbf{x}}^2 V &= (\mathbf{A}(t) + (\mathbf{A}(t) \mathbf{x} + \mathbf{b}(t)) (\mathbf{A}(t) \mathbf{x} + \mathbf{b}(t))^\top) V, \\ \nabla_{\mathbf{x}, z}^2 V &= \frac{1-\gamma}{z} (\mathbf{A}(t) \mathbf{x} + \mathbf{b}(t)) V. \end{cases}$$

The HJB equation (27) becomes

$$\begin{aligned} 0 &= \frac{1}{2} \mathbf{x}^\top \left\{ \mathbf{A}'(t) + \frac{1-\gamma}{\gamma} \boldsymbol{\eta}_t \boldsymbol{\Sigma} \boldsymbol{\eta}_t + \frac{1}{\gamma} (\mathbf{A}(t) \boldsymbol{\Sigma} \boldsymbol{\eta}_t + \boldsymbol{\eta}_t \boldsymbol{\Sigma} \mathbf{A}(t)) + \frac{1}{\gamma} \mathbf{A}(t) \boldsymbol{\Sigma} \mathbf{A}(t) \right\} \mathbf{x} \\ &\quad + \mathbf{x}^\top \left\{ \mathbf{b}'(t) + \frac{1}{\gamma} (\boldsymbol{\eta}_t + \mathbf{A}(t)) \boldsymbol{\Sigma} \mathbf{b}(t) + \frac{1-\gamma}{\gamma} (\boldsymbol{\eta}_t + \mathbf{A}(t)) (\boldsymbol{\alpha}_t - r_f \mathbf{1}_N) + \mathbf{A}(t) \left( \boldsymbol{\alpha}_t - \frac{\text{diag}(\boldsymbol{\Sigma})}{2} \right) \right\} \\ &\quad + c'(t) + (1-\gamma)r_f + \frac{1}{2} \text{Tr}(\mathbf{A}(t)\boldsymbol{\Sigma}) + \frac{1-\gamma}{2\gamma} (\boldsymbol{\alpha}_t - r_f \mathbf{1}_N)^\top \boldsymbol{\Sigma}^{-1} (\boldsymbol{\alpha}_t - r_f \mathbf{1}_N) + \left( \boldsymbol{\alpha}_t - \frac{\text{diag}(\boldsymbol{\Sigma})}{2} \right)^\top \mathbf{b}(t) \\ &\quad + \frac{1-\gamma}{\gamma} (\boldsymbol{\alpha}_t - r_f \mathbf{1}_N)^\top \mathbf{b}(t) + \frac{1}{2\gamma} \mathbf{b}^\top(t) \boldsymbol{\Sigma} \mathbf{b}(t) \end{aligned}$$

with terminal conditions  $\mathbf{A}(T) = \mathbf{0}$ ,  $\mathbf{b}(T) = \mathbf{0}$  and  $c(T) = 0$ . It follows that if  $\mathbf{A}(t)$ ,  $\mathbf{b}(t)$  and  $c(t)$  satisfy (30)–(32), that (29) is the solution of (27).

To see that  $\mathbf{A}(t)$  is strictly negative definite when  $t < T$ , consider the linear quadratic problem

$$\tilde{V}(t, \mathbf{x}) = \min_{\mathbf{u}} \int_t^T \left\{ \mathbf{x}_t^\top \left( -\frac{1-\gamma}{\gamma} \boldsymbol{\eta}_t^\top \boldsymbol{\Sigma} \boldsymbol{\eta}_t \right) \mathbf{x}_t + \frac{1}{\gamma} \mathbf{u}_t^\top \boldsymbol{\Sigma} \mathbf{u}_t \right\} dt$$

where

$$\begin{aligned} d\mathbf{x}_t &= \frac{1}{\gamma} \boldsymbol{\Sigma} \boldsymbol{\eta}_t \mathbf{x}_t + \frac{1}{\gamma} \boldsymbol{\Sigma} \mathbf{u}_t \\ \mathbf{x}_t &= \mathbf{x}. \end{aligned}$$

Since  $-\frac{1-\gamma}{\gamma} \boldsymbol{\eta}_t^\top \boldsymbol{\Sigma} \boldsymbol{\eta}_t \succeq \mathbf{0}$  and  $\boldsymbol{\Sigma} \succ \mathbf{0}$  when  $t < T$ ,  $\tilde{V}(t, \mathbf{x}) > 0$  unless  $\mathbf{x} = \mathbf{0}$ . It can be shown that  $\tilde{V}(t, \mathbf{x}) = -\mathbf{x}^\top \mathbf{A}(t) \mathbf{x}$  which implies that  $\mathbf{A}(t)$  is strictly negative definite when  $t < T$ .

Given (29), the optimal investment policy is

$$\boldsymbol{\pi}^*(t) = \frac{1}{\gamma} (\boldsymbol{\Sigma}^{-1} (\tilde{\boldsymbol{\mu}}(t, \mathbf{x}) - r_f \mathbf{1}_N) + \mathbf{A}(t) \mathbf{x} + \mathbf{b}(t)).$$

which completes the proof.  $\square$

### EC.3.2. Proof of Theorem 2

We derive explicit expressions for the ODEs (30), (31) and the hedging demand (35).

**Explicit solution of Riccati equation (30).** The following results will be useful.

LEMMA EC.1. *Suppose Assumption 1 holds and  $\boldsymbol{\eta}_t$  is given by (EC.16). Then  $\boldsymbol{\eta}_t$  is symmetric and negative semi-definite for  $t \in [0, T]$  and*

$$\begin{aligned} \frac{d\boldsymbol{\eta}_t}{dt} &= -\boldsymbol{\eta}_t \boldsymbol{\Sigma} \boldsymbol{\eta}_t \\ \boldsymbol{\eta}_T &= -\mathbf{P}^\top (T\boldsymbol{\Omega})^{-1} \mathbf{P}. \end{aligned}$$

If

$$\boldsymbol{\zeta}_t = -\mathbf{P}^\top \left( \frac{1}{\gamma} (T-t) \mathbf{P} \boldsymbol{\Sigma} \mathbf{P}^\top + T\boldsymbol{\Omega} \right)^{-1} \mathbf{P} \quad (\text{EC.18})$$

then

$$\begin{cases} \boldsymbol{\zeta}_t' + \frac{1}{\gamma} \boldsymbol{\zeta}_t \boldsymbol{\Sigma} \boldsymbol{\zeta}_t = \mathbf{0} \\ \boldsymbol{\zeta}_T = \boldsymbol{\eta}_T. \end{cases} \quad (\text{EC.19})$$

*Proof* It is clear that  $\boldsymbol{\eta}_t$  is symmetric and negative semi-definite. Additionally, for an invertible matrix  $\mathbf{R}(t) \in \mathbb{R}^{K \times K}$

$$\frac{d}{dt} (\mathbf{R}^{-1}(t)) = -\mathbf{R}^{-1}(t) \frac{d}{dt} (\mathbf{R}(t)) \mathbf{R}^{-1}(t). \quad (\text{EC.20})$$

If

$$\mathbf{R}(t) = (T-t) \mathbf{P} \boldsymbol{\Sigma} \mathbf{P}^\top + T\boldsymbol{\Omega} \in \mathbb{R}^{K \times K},$$

$$\begin{aligned}
\frac{d}{dt}\boldsymbol{\eta}_t &= -\mathbf{P}^\top \frac{d}{dt}(\mathbf{R}^{-1}(t))\mathbf{P} \\
&= \mathbf{P}^\top \mathbf{R}^{-1}(t) \frac{d}{dt}(\mathbf{R}(t))\mathbf{R}^{-1}(t)\mathbf{P} \\
&= -\boldsymbol{\eta}_t \boldsymbol{\Sigma} \boldsymbol{\eta}_t.
\end{aligned}$$

The ODE for  $\boldsymbol{\zeta}_t$  can be derived similarly.  $\square$

Let

$$\mathbf{A}(t) = \boldsymbol{\zeta}_t - \boldsymbol{\eta}_t. \quad (\text{EC.21})$$

Since  $\mathbf{A}(T) = \mathbf{0}$  and

$$\begin{aligned}
\frac{d}{dt}\mathbf{A}(t) &= -\frac{1}{\gamma}\boldsymbol{\zeta}_t \boldsymbol{\Sigma} \boldsymbol{\zeta}_t + \boldsymbol{\eta}_t \boldsymbol{\Sigma} \boldsymbol{\eta}_t \\
&= -\frac{1-\gamma}{\gamma}\boldsymbol{\eta}_t \boldsymbol{\Sigma} \boldsymbol{\eta}_t - \frac{1}{\gamma}(\mathbf{A}(t)\boldsymbol{\Sigma}\boldsymbol{\eta}_t + \boldsymbol{\eta}_t\boldsymbol{\Sigma}\mathbf{A}(t)) - \frac{1}{\gamma}\mathbf{A}(t)\boldsymbol{\Sigma}\mathbf{A}(t)
\end{aligned}$$

it follows that the solution of (30) is (EC.21).

Now we show that

$$\mathbf{A}(t) = \boldsymbol{\zeta}_t - \boldsymbol{\eta}_t = \mathbf{M}(t)\boldsymbol{\eta}_t$$

where

$$\mathbf{M}(t) = (\gamma - 1)\left(1 - \frac{t}{T}\right)\mathbf{P}^\top \boldsymbol{\Omega}^{-1}\mathbf{P} \left(\gamma\boldsymbol{\Sigma}^{-1} + \left(1 - \frac{t}{T}\right)\mathbf{P}^\top \boldsymbol{\Omega}^{-1}\mathbf{P}\right)^{-1} \in \mathbb{R}^{N \times N}. \quad (\text{EC.22})$$

Observe from (EC.21) that

$$\mathbf{A}(t) = -\mathbf{P}^\top (\mathbf{C}(t)^{-1} - \mathbf{F}(t)^{-1})\mathbf{P},$$

where

$$\begin{aligned}
\mathbf{C}(t) &= \frac{T-t}{\gamma}\mathbf{P}\boldsymbol{\Sigma}\mathbf{P}^\top + T\boldsymbol{\Omega}, \\
\mathbf{F}(t) &= (T-t)\mathbf{P}\boldsymbol{\Sigma}\mathbf{P}^\top + T\boldsymbol{\Omega}.
\end{aligned}$$

Since

$$\begin{aligned}
\mathbf{C}(t)^{-1} &= \left(\frac{1-\gamma}{\gamma}(T-t)\mathbf{P}\boldsymbol{\Sigma}\mathbf{P}^\top + \mathbf{F}(t)\right)^{-1} \\
&\stackrel{(a)}{=} \mathbf{F}(t)^{-1} - \mathbf{F}(t)^{-1}\mathbf{P} \left(\frac{\gamma}{(1-\gamma)(T-t)}\boldsymbol{\Sigma}^{-1} + \mathbf{P}^\top \mathbf{F}(t)^{-1}\mathbf{P}\right)^{-1} \mathbf{P}^\top \mathbf{F}(t)^{-1},
\end{aligned}$$

where (a) follows from the Woodbury identity, it follows that

$$\begin{aligned}
\mathbf{A}(t) &= -\mathbf{P}^\top (\mathbf{C}(t)^{-1} - \mathbf{F}(t)^{-1})\mathbf{P} \\
&= \mathbf{P}^\top \mathbf{F}(t)^{-1}\mathbf{P} \left(\frac{\gamma}{(1-\gamma)(T-t)}\boldsymbol{\Sigma}^{-1} + \mathbf{P}^\top \mathbf{F}(t)^{-1}\mathbf{P}\right)^{-1} \mathbf{P}^\top \mathbf{F}(t)^{-1}\mathbf{P} \\
&= -\boldsymbol{\eta}_t \left(\frac{\gamma}{(\gamma-1)(T-t)}\boldsymbol{\Sigma}^{-1} + \boldsymbol{\eta}_t\right)^{-1} \boldsymbol{\eta}_t.
\end{aligned}$$

The Woodbury identity also implies that

$$\begin{aligned}
-\boldsymbol{\eta}_t \left(\frac{\gamma}{(\gamma-1)(T-t)}\boldsymbol{\Sigma}^{-1} + \boldsymbol{\eta}_t\right)^{-1} &= (\gamma-1)\left(1 - \frac{t}{T}\right)\mathbf{P}^\top \boldsymbol{\Omega}^{-1}\mathbf{P} \left(\gamma\boldsymbol{\Sigma}^{-1} + \left(1 - \frac{t}{T}\right)\mathbf{P}^\top \boldsymbol{\Omega}^{-1}\mathbf{P}\right)^{-1} \\
&= \mathbf{M}(t)
\end{aligned} \quad (\text{EC.23})$$

so  $\mathbf{A}(t) = \mathbf{M}(t)\boldsymbol{\eta}_t$ , where  $\mathbf{M}(t)$  satisfies (EC.22).

**Explicit solution of ODE (31).** The following result will be useful.

LEMMA EC.2. *Let*

$$\mathbf{s}(t) = \left( \frac{\gamma}{(\gamma-1)(T-t)} \boldsymbol{\Sigma}^{-1} + \boldsymbol{\eta}_t \right)^{-1} \in \mathbb{R}^{N \times N}.$$

Then the matrices  $\boldsymbol{\eta}_t \boldsymbol{\Sigma} \in \mathbb{R}^{N \times N}$  and  $\boldsymbol{\eta}_t \mathbf{s}(t) \in \mathbb{R}^{N \times N}$  commute for all  $t \in [0, T)$ , i.e.,

$$(\boldsymbol{\eta}_t \boldsymbol{\Sigma})(\boldsymbol{\eta}_t \mathbf{s}(t)) = (\boldsymbol{\eta}_t \mathbf{s}(t))(\boldsymbol{\eta}_t \boldsymbol{\Sigma}), \text{ for } t \in [0, T).$$

*Proof* We have

$$\mathbf{s}(t) = (\lambda_t \boldsymbol{\Sigma}^{-1} + \boldsymbol{\eta}_t)^{-1} \in \mathbb{R}^{N \times N},$$

with  $\lambda_t = \frac{\gamma}{(\gamma-1)(T-t)}$ . We can then write

$$\begin{aligned} \boldsymbol{\eta}_t \mathbf{s}(t) \boldsymbol{\eta}_t \boldsymbol{\Sigma} &= \boldsymbol{\eta}_t \mathbf{s}(t) (\boldsymbol{\eta}_t + \lambda_t \boldsymbol{\Sigma}^{-1} - \lambda_t \boldsymbol{\Sigma}^{-1}) \boldsymbol{\Sigma} \\ &= \boldsymbol{\eta}_t \boldsymbol{\Sigma} (\mathbf{I}_N - \lambda_t \boldsymbol{\Sigma}^{-1} \mathbf{s}(t)) \\ &= \boldsymbol{\eta}_t \boldsymbol{\Sigma} \boldsymbol{\eta}_t \mathbf{s}(t) \end{aligned}$$

which completes the proof. □

We now show that

$$\mathbf{b}(t) = \mathbf{M}(t) \boldsymbol{\Sigma}^{-1} (\boldsymbol{\alpha}_t - r_f \mathbf{1}_N)$$

is the unique solution of (31). (Recall that  $\mathbf{A}(t) = \mathbf{M}(t) \boldsymbol{\eta}_t$ .)

Since  $\mathbf{M}(T) = \mathbf{0}$ ,  $\mathbf{b}(T) = \mathbf{0}$ , the terminal condition is satisfied. Differentiating with respect to  $t$

$$\mathbf{b}'(t) = \mathbf{M}'(t) \boldsymbol{\Sigma}^{-1} (\boldsymbol{\alpha}_t - r_f \mathbf{1}_N) + \mathbf{M}(t) \boldsymbol{\Sigma}^{-1} \frac{\partial \boldsymbol{\alpha}_t}{\partial t}.$$

From (EC.17) and Lemma EC.1

$$\frac{d\boldsymbol{\alpha}_t}{dt} = -\boldsymbol{\eta}_t (\boldsymbol{\alpha}_t - \frac{1}{2} \text{diag}(\boldsymbol{\Sigma})),$$

so

$$\mathbf{b}'(t) = \mathbf{M}'(t) \boldsymbol{\Sigma}^{-1} (\boldsymbol{\alpha}_t - r_f \mathbf{1}_N) - \mathbf{A}(t) (\boldsymbol{\alpha}_t - \frac{1}{2} \text{diag}(\boldsymbol{\Sigma})).$$

Therefore, we show  $\mathbf{b}(t)$  satisfies (37) by showing

$$\mathbf{M}'(t) \boldsymbol{\Sigma}^{-1} (\boldsymbol{\alpha}_t - r_f \mathbf{1}_N) = -\frac{1}{\gamma} (\boldsymbol{\eta}_t + \mathbf{A}(t)) \boldsymbol{\Sigma} \mathbf{b}(t) - \frac{1-\gamma}{\gamma} (\boldsymbol{\eta}_t + \mathbf{A}(t)) (\boldsymbol{\alpha}_t - r_f \mathbf{1}_N). \quad (\text{EC.24})$$

Define

$$\mathbf{s}(t) = \left( \frac{\gamma}{(\gamma-1)(T-t)} \boldsymbol{\Sigma}^{-1} + \boldsymbol{\eta}_t \right)^{-1} \in \mathbb{R}^{N \times N}.$$

Observe  $\mathbf{s}(t)$  is invertible and  $\mathbf{M}(t) = -\boldsymbol{\eta}_t \mathbf{s}(t)$  (EC.23). It follows that

$$\begin{aligned}
\mathbf{M}'(t) &= -(\boldsymbol{\eta}_t \mathbf{s}(t))' \\
&\stackrel{(a)}{=} \boldsymbol{\eta}_t \boldsymbol{\Sigma} \boldsymbol{\eta}_t - \boldsymbol{\eta}_t \mathbf{s}'(t) \\
&\stackrel{(b)}{=} \boldsymbol{\eta}_t \boldsymbol{\Sigma} \boldsymbol{\eta}_t + \boldsymbol{\eta}_t \mathbf{s}(t) (\mathbf{s}^{-1}(t))' \mathbf{s}(t) \\
&= \boldsymbol{\eta}_t \boldsymbol{\Sigma} \boldsymbol{\eta}_t - \frac{1-\gamma}{\gamma} \boldsymbol{\eta}_t (\mathbf{I}_N - \mathbf{s}(t) \boldsymbol{\eta}_t) \boldsymbol{\Sigma} (\mathbf{I}_N - \boldsymbol{\eta}_t \mathbf{s}(t)),
\end{aligned} \tag{EC.25}$$

where (a) follow from Lemma EC.1 and (b) from the expression of the derivative of the inverse. Because of Lemma EC.2

$$\begin{aligned}
\mathbf{M}'(t) &\stackrel{(b)}{=} -\frac{1}{\gamma} (\boldsymbol{\eta}_t + \mathbf{M}(t) \boldsymbol{\eta}_t) \boldsymbol{\Sigma} \mathbf{M}(t) - \frac{1-\gamma}{\gamma} (\boldsymbol{\eta}_t + \mathbf{M}(t) \boldsymbol{\eta}_t) \boldsymbol{\Sigma} \\
&\stackrel{(c)}{=} -\frac{1}{\gamma} (\boldsymbol{\eta}_t + \mathbf{A}(t)) \boldsymbol{\Sigma} \mathbf{M}(t) - \frac{1-\gamma}{\gamma} (\boldsymbol{\eta}_t + \mathbf{A}(t)) \boldsymbol{\Sigma},
\end{aligned}$$

where (b) from the definition of  $\mathbf{s}(t)$  and (c) from the expression of  $\mathbf{A}(t)$ . It follows that

$$\begin{aligned}
\mathbf{M}'(t) \boldsymbol{\Sigma}^{-1} (\boldsymbol{\alpha}_t - r_f \mathbf{1}_N) &= -\frac{1}{\gamma} (\boldsymbol{\eta}_t + \mathbf{A}(t)) \boldsymbol{\Sigma} \mathbf{M}(t) \boldsymbol{\Sigma}^{-1} (\boldsymbol{\alpha}_t - r_f \mathbf{1}_N) - \frac{1-\gamma}{\gamma} (\boldsymbol{\eta}_t + \mathbf{A}(t)) (\boldsymbol{\alpha}_t - r_f \mathbf{1}_N) \\
&= -\frac{1}{\gamma} (\boldsymbol{\eta}_t + \mathbf{A}(t)) \boldsymbol{\Sigma} \mathbf{b}(t) - \frac{1-\gamma}{\gamma} (\boldsymbol{\eta}_t + \mathbf{A}(t)) (\boldsymbol{\alpha}_t - r_f \mathbf{1}_N).
\end{aligned}$$

which shows that (EC.24) holds and hence that  $\mathbf{b}(t)$  is a solution of (31). Since (31) is a linear ODE with coefficients that are bounded, this solution is unique.

**Hedging demand (35).** From (37) the hedging demand can be written

$$\begin{aligned}
\frac{1}{\gamma} \frac{\partial g}{\partial \mathbf{x}}(t, \mathbf{x}) &= \frac{1}{\gamma} (\mathbf{A}(t) \mathbf{x} + \mathbf{b}(t)) \\
&= \frac{1}{\gamma} (\mathbf{M}(t) \boldsymbol{\eta}_t \mathbf{x} + \mathbf{M}(t) \boldsymbol{\Sigma}^{-1} (\boldsymbol{\alpha}_t - r_f \mathbf{1}_N)) \\
&\stackrel{(b)}{=} \frac{1}{\gamma} (\mathbf{M}(t) \boldsymbol{\Sigma}^{-1} (\tilde{\boldsymbol{\mu}}(t, \mathbf{x}) - r_f \mathbf{1}_N)) \\
&\stackrel{(c)}{=} \mathbf{M}(t) \boldsymbol{\pi}_{MV}^*(t),
\end{aligned}$$

where (b) follows from the definition of  $\boldsymbol{\alpha}_t$  and  $\boldsymbol{\eta}_t$ , and (c) from the definition of the mean-variance term

$$\boldsymbol{\pi}_{MV}^*(t) = \frac{1}{\gamma} \boldsymbol{\Sigma}^{-1} (\tilde{\boldsymbol{\mu}}(t, \mathbf{x}) - r_f \mathbf{1}_N).$$

□

### EC.3.3. Proof of Corollary 1

From (39) in Theorem 2

$$\frac{\partial g}{\partial \mathbf{x}} = \mathbf{M}(t) \boldsymbol{\Sigma}^{-1} (\tilde{\boldsymbol{\mu}}(t, \mathbf{x}) - r_f \mathbf{1}_N).$$

where  $\mathbf{M}(t)$  is given by (EC.22). It follows from (38) that

$$\boldsymbol{\pi}^*(t) = \frac{1}{\gamma} (\mathbf{I}_N + \mathbf{M}(t)) \boldsymbol{\Sigma}^{-1} (\tilde{\boldsymbol{\mu}}(t, \mathbf{x}) - r_f \mathbf{1}_N).$$

Now we show that

$$\begin{aligned} \left( (\mathbf{I}_N + \mathbf{M}(t)) \boldsymbol{\Sigma}^{-1} \right)^{-1} &\equiv (\boldsymbol{\Sigma}^{-1} + (1 - \frac{t}{T}) \mathbf{P}^\top \boldsymbol{\Omega}^{-1} \mathbf{P})^{-1} + \frac{1}{\gamma} (\boldsymbol{\Sigma} - (\boldsymbol{\Sigma}^{-1} + (1 - \frac{t}{T}) \mathbf{P}^\top \boldsymbol{\Omega}^{-1} \mathbf{P})^{-1}) \\ &= \boldsymbol{\Sigma}_{\text{DBL}}. \end{aligned}$$

From (EC.23)

$$\begin{aligned} \mathbf{M}(t) &= -\boldsymbol{\eta}_t \left( \frac{\gamma}{(\gamma-1)(T-t)} \boldsymbol{\Sigma}^{-1} + \boldsymbol{\eta}_t \right)^{-1} \\ &= -\mathbf{I}_N + \frac{\gamma}{(\gamma-1)(T-t)} \boldsymbol{\Sigma}^{-1} \left( \frac{\gamma}{(\gamma-1)(T-t)} \boldsymbol{\Sigma}^{-1} + \boldsymbol{\eta}_t \right)^{-1}. \end{aligned}$$

Since  $\mathbf{M}(t)$  is positive semi-definite when  $\gamma > 1$  (see (EC.22)), follows that  $\mathbf{I}_N + \mathbf{M}(t)$  is positive definite invertible. We can then write

$$\begin{aligned} \left( (\mathbf{I}_N + \mathbf{M}(t)) \boldsymbol{\Sigma}^{-1} \right)^{-1} &= \boldsymbol{\Sigma} (\mathbf{I}_N + \mathbf{M}(t))^{-1} \\ &= \frac{(\gamma-1)(T-t)}{\gamma} \boldsymbol{\Sigma} \left( \frac{\gamma}{(\gamma-1)(T-t)} \boldsymbol{\Sigma}^{-1} - \mathbf{P}^\top ((T-t) \mathbf{P} \boldsymbol{\Sigma} \mathbf{P}^\top + T \boldsymbol{\Omega})^{-1} \mathbf{P} \right) \boldsymbol{\Sigma}. \end{aligned}$$

Woodbury's identity implies

$$\mathbf{P}^\top ((T-t) \mathbf{P} \boldsymbol{\Sigma} \mathbf{P}^\top + T \boldsymbol{\Omega})^{-1} \mathbf{P} = \frac{1}{T-t} \boldsymbol{\Sigma}^{-1} - \frac{1}{T-t} \boldsymbol{\Sigma}^{-1} (\boldsymbol{\Sigma}^{-1} + (1 - \frac{t}{T}) \mathbf{P}^\top \boldsymbol{\Omega}^{-1} \mathbf{P})^{-1} \boldsymbol{\Sigma}^{-1}$$

from which it follows that

$$\begin{aligned} \left( (\mathbf{I}_N + \mathbf{M}(t)) \boldsymbol{\Sigma}^{-1} \right)^{-1} &= \frac{(\gamma-1)(T-t)}{\gamma} \boldsymbol{\Sigma} \left( \frac{\gamma}{(\gamma-1)(T-t)} \boldsymbol{\Sigma}^{-1} - \mathbf{P}^\top ((T-t) \mathbf{P} \boldsymbol{\Sigma} \mathbf{P}^\top + T \boldsymbol{\Omega})^{-1} \mathbf{P} \right) \boldsymbol{\Sigma} \\ &= \frac{1}{\gamma} \boldsymbol{\Sigma} + (1 - \frac{1}{\gamma}) \left( \boldsymbol{\Sigma}^{-1} + (1 - \frac{t}{T}) \mathbf{P}^\top \boldsymbol{\Omega}^{-1} \mathbf{P} \right)^{-1} \\ &= \boldsymbol{\Sigma}_{\text{DBL}}. \end{aligned}$$

Therefore, we have

$$\boldsymbol{\pi}^*(t) = \frac{1}{\gamma} \boldsymbol{\Sigma}_{\text{DBL}}^{-1} (\tilde{\boldsymbol{\mu}}(t, \mathbf{x}) - r_f \mathbf{1}_N),$$

which completes the proof.  $\square$

#### EC.3.4. Single-Period Black-Litterman

From (8), the log-returns follow

$$\mathbf{X}(t) = t \boldsymbol{\mu}^x + \mathbf{W}(t),$$

where  $\mathbf{W}(t)$  is a Brownian motion with covariance matrix  $\boldsymbol{\Sigma}$ . Then for  $T \geq t$  we have

$$\mathbf{X}(T) = \mathbf{X}(t) + (T-t) \boldsymbol{\mu}^x + (\mathbf{W}(T) - \mathbf{W}(t)). \quad (\text{EC.26})$$

The investor's views are modeled by

$$\mathbf{Y}(0, T) = \mathbf{P} \mathbf{X}(T) + \boldsymbol{\epsilon},$$

with  $\boldsymbol{\epsilon}$  being independent Gaussian noise with  $\mathbf{0}$  mean and covariance  $T\boldsymbol{\Omega}$ . Inserting (EC.26) into the view, we write

$$\mathbf{Y}(0, T) = \mathbf{P} \left( \mathbf{X}(t) + (T-t)\boldsymbol{\mu}^x + (\mathbf{W}(T) - \mathbf{W}(t)) \right) + \boldsymbol{\epsilon}. \quad (\text{EC.27})$$

Since  $\mathbf{X}(T)$  and  $\mathbf{Y}(0, T)$  are jointly Gaussian, the conditional expectation is given by

$$\begin{aligned} \mathbb{E} \left[ \mathbf{X}(T) \mid \mathbf{X}(t), \mathbf{Y}(0, T) = \mathbf{y} \right] &= \mathbb{E} \left[ \mathbf{X}(T) \mid \mathbf{X}(t) \right] \\ &+ \text{Cov} \left( \mathbf{X}(T), \mathbf{Y}(0, T) \mid \mathbf{X}(t) \right) \mathbb{V} \left[ \mathbf{Y}(0, T) \mid \mathbf{X}(t) \right]^{-1} \left( \mathbf{y} - \mathbb{E} \left[ \mathbf{Y}(0, T) \mid \mathbf{X}(t) \right] \right). \end{aligned} \quad (\text{EC.28})$$

**Derivation of the Conditional Mean** From (EC.26) we have

$$\mathbb{E} \left[ \mathbf{X}(T) \mid \mathbf{X}(t) \right] = \mathbf{X}(t) + (T-t)\boldsymbol{\mu}^x.$$

It follows from (EC.27) that

$$\begin{aligned} \mathbb{E} \left[ \mathbf{Y}(0, T) \mid \mathbf{X}(t) \right] &= \mathbf{P} \left( \mathbf{X}(t) + (T-t)\boldsymbol{\mu}^x \right), \\ \mathbb{V} \left[ \mathbf{Y}(0, T) \mid \mathbf{X}(t) \right] &= (T-t)\mathbf{P}\boldsymbol{\Sigma}\mathbf{P}^\top + T\boldsymbol{\Omega}, \end{aligned}$$

and

$$\text{Cov} \left( \mathbf{X}(T), \mathbf{Y}(0, T) \mid \mathbf{X}(t) \right) = \text{Cov} \left( \mathbf{W}(T) - \mathbf{W}(t), \mathbf{P}(\mathbf{W}(T) - \mathbf{W}(t)) \right) = (T-t)\boldsymbol{\Sigma}\mathbf{P}^\top.$$

Substituting in (EC.28) it can be shown that

$$\mathbb{E} \left[ \mathbf{X}(T) - \mathbf{X}(t) \mid \mathbf{X}(t), \mathbf{Y}(0, T) = \mathbf{y} \right] = (T-t)\tilde{\boldsymbol{\mu}}^x(t, \mathbf{X}(t)) \quad (\text{EC.29})$$

where

$$\begin{aligned} \tilde{\boldsymbol{\mu}}^x(t, \mathbf{x}) &= \boldsymbol{\mu}^x + \boldsymbol{\beta}_1(\mathbf{y} - T\mathbf{P}\boldsymbol{\mu}^x) + \boldsymbol{\beta}_2(t)(\mathbb{E}[\mathbf{X}^y(t)] - \mathbf{x}) \\ \boldsymbol{\beta}_1 &= \frac{1}{T}\boldsymbol{\Sigma}\mathbf{P}^\top(\mathbf{P}\boldsymbol{\Sigma}\mathbf{P}^\top + \boldsymbol{\Omega})^{-1}, \\ \boldsymbol{\beta}_2(t) &= \boldsymbol{\Sigma}\mathbf{P}^\top((T-t)\mathbf{P}\boldsymbol{\Sigma}\mathbf{P}^\top + T\boldsymbol{\Omega})^{-1}\mathbf{P} \end{aligned}$$

**Derivation of the Conditional Covariance** For jointly Gaussian variables the conditional covariance is given by

$$\begin{aligned} \mathbb{V} \left[ \mathbf{X}(T) \mid \mathbf{X}(t), \mathbf{Y}(0, T) = \mathbf{y} \right] &= \mathbb{V} \left[ \mathbf{X}(T) \mid \mathbf{X}(t) \right] \\ &- \text{Cov} \left( \mathbf{X}(T), \mathbf{Y}(0, T) \mid \mathbf{X}(t) \right) \mathbb{V} \left[ \mathbf{Y}(0, T) \mid \mathbf{X}(t) \right]^{-1} \text{Cov} \left( \mathbf{Y}(0, T), \mathbf{X}(T) \mid \mathbf{X}(t) \right). \end{aligned}$$

Since  $\mathbb{V} \left[ \mathbf{X}(T) \mid \mathbf{X}(t) \right] = (T-t)\boldsymbol{\Sigma}$ , and using the expressions

$$\text{Cov} \left( \mathbf{X}(T), \mathbf{Y}(0, T) \mid \mathbf{X}(t) \right) = (T-t)\boldsymbol{\Sigma}\mathbf{P}^\top, \quad \mathbb{V} \left[ \mathbf{Y}(0, T) \mid \mathbf{X}(t) \right] = (T-t)\mathbf{P}\boldsymbol{\Sigma}\mathbf{P}^\top + T\boldsymbol{\Omega},$$

we deduce that

$$\mathbb{V}\left[\mathbf{X}(T) - \mathbf{X}(t) \mid \mathbf{X}(t), \mathbf{Y}(0, T) = \mathbf{y}\right] = (T-t)\boldsymbol{\Sigma} - (T-t)^2\boldsymbol{\Sigma}\mathbf{P}^\top \left( (T-t)\mathbf{P}\boldsymbol{\Sigma}\mathbf{P}^\top + T\boldsymbol{\Omega} \right)^{-1} \mathbf{P}\boldsymbol{\Sigma}. \quad (\text{EC.30})$$

By applying Woodbury's matrix identity to the right-hand side of (EC.30), we write

$$\mathbb{V}\left[\mathbf{X}(T) - \mathbf{X}(t) \mid \mathbf{X}(t), \mathbf{Y}(0, T) = \mathbf{y}\right] = (T-t) \left( \boldsymbol{\Sigma}^{-1} + \left(1 - \frac{t}{T}\right) \mathbf{P}^\top \boldsymbol{\Omega}^{-1} \mathbf{P} \right)^{-1}.$$

Thus, we define  $\boldsymbol{\Sigma}_{BL|t} = \left( \boldsymbol{\Sigma}^{-1} + \left(1 - \frac{t}{T}\right) \mathbf{P}^\top \boldsymbol{\Omega}^{-1} \mathbf{P} \right)^{-1}$ .

**Optimal Portfolio Policy** In the single-period setting, an investor with risk-aversion parameter  $\gamma > 0$  maximizes the objective

$$\begin{aligned} \max_{\boldsymbol{\pi}} \quad & \boldsymbol{\pi}^\top \mathbb{E}\left[\mathbf{X}(T) - \mathbf{X}(t) \mid \mathbf{X}(t), \mathbf{Y}(0, T) = \mathbf{y}\right] + \left(1 - \boldsymbol{\pi}^\top \mathbf{1}_N\right) r_f \\ & - \frac{\gamma}{2} \boldsymbol{\pi}^\top \mathbb{V}\left[\mathbf{X}(T) - \mathbf{X}(t) \mid \mathbf{X}(t), \mathbf{Y}(0, T) = \mathbf{y}\right] \boldsymbol{\pi}, \end{aligned}$$

where  $r_f$  is the risk-free rate. Using (EC.29) and (EC.30), the optimal portfolio is

$$\boldsymbol{\pi}_{BL|t}^* = \frac{1}{\gamma} (\boldsymbol{\Sigma}_{BL|t})^{-1} \left( \tilde{\boldsymbol{\mu}}^x(t, \mathbf{x}) - r_f \mathbf{1}_N \right).$$

□

## EC.4. Section 6

### EC.4.1. Section 6.1

**EC.4.1.1. Proof of Proposition 7** Recall that the state variable  $\mathbf{I}(t) = \mathbf{Y}^j(t_j, T)$  is the most recent expert view and

$$\bar{\mathbf{X}}(t) = \mathbf{X}(t) - \mathbf{X}(t_j)$$

is the log-returns over the horizon  $[t_j, t_{j+1}]$ . The following result shows that  $\bar{\mathbf{X}}(t)$  given the most recent view  $\mathbf{I}(t)$  is independent of earlier views.

**LEMMA EC.3.** *For  $t \in [t_j, t_{j+1})$ , given the most recent view  $\mathbf{Y}^j(t_j, T)$ , the process  $\bar{\mathbf{X}}(t)$  is independent of all previous views  $\mathbf{Y}^k(t_k, T)$ ,  $k \in \{0, \dots, j-1\}$ .*

The proof is given in Appendix EC.5.

From Lemma EC.3, it follows that

$$\bar{\mathbf{X}}^y(t) \triangleq \bar{\mathbf{X}}(t) \mid \mathcal{F}_t^{\mathbf{Y}} = \bar{\mathbf{X}}(t) \mid \mathbf{I}(t).$$

At time  $t = t_j$ , the investor receives the view  $\mathbf{Y}^j(t_j, T) = \mathbf{y}^j$  with covariance matrix  $\boldsymbol{\Omega}^j$ . It follows from Proposition 1 that the dynamics of  $\bar{\mathbf{X}}^y(t)$  on  $[t_j, t_{j+1})$  are given by

$$d\bar{\mathbf{X}}^y(t) = \left( \boldsymbol{\mu}^x + \boldsymbol{\beta}_1^j (\mathbf{y}^j - (T-t_j)\mathbf{P}\boldsymbol{\mu}^x) + \boldsymbol{\beta}_2^j(t) (\mathbb{E}[\bar{\mathbf{X}}^y(t)] - \bar{\mathbf{X}}^y(t)) \right) dt + d\mathbf{W}^y(t) \quad (\text{EC.31})$$

where

$$\begin{aligned}\beta_1^j &= \Sigma \mathbf{P}^\top ((T - t_j) \mathbf{P} \Sigma \mathbf{P}^\top + \Omega^j)^{-1} \in \mathbb{R}^{N \times K}, \\ \beta_2^j(t) &= \Sigma \mathbf{P}^\top ((T - t) \mathbf{P} \Sigma \mathbf{P}^\top + \Omega^j)^{-1} \mathbf{P} \in \mathbb{R}^{N \times N}, \\ \mathbb{E}[\bar{\mathbf{X}}^y(t)] &= (t - t_j) (\boldsymbol{\mu}^x + \beta_1^j (\mathbf{y}^j - (T - t_j) \mathbf{P} \boldsymbol{\mu}^x)).\end{aligned}$$

This completes the proof.  $\square$

**EC.4.1.2. Proof of Theorem 3** We show the value function is of the form

$$V(t, z, \bar{\mathbf{x}}, \mathbf{y}) = U(z) \exp(g^j(t, \bar{\mathbf{x}}, \mathbf{y})), \quad t \in [t_j, t_{j+1})$$

where  $g^j : \mathbb{R} \times \mathbb{R}^N \times \mathbb{R}^K \rightarrow \mathbb{R}$  is quadratic in the log-returns vector  $\mathbf{x}$  and views  $\mathbf{y}$

$$g^j(t, \bar{\mathbf{x}}, \mathbf{y}) = \frac{1}{2} \bar{\mathbf{x}}^\top \mathbf{A}^j(t) \bar{\mathbf{x}} + \bar{\mathbf{x}}^\top (\mathbf{B}^j(t) \mathbf{y} + \bar{\mathbf{b}}^j(t)) + \left( -\frac{1}{2} \mathbf{y}^\top \bar{\mathbf{C}}^j(t) \mathbf{y} + \mathbf{y}^\top \hat{\mathbf{c}}^j(t) + \bar{c}^j(t) \right). \quad (\text{EC.32})$$

We derive ODEs for the coefficients of this function using dynamic programming; specifically, the value function solves the HJB equation in each interval  $(t_j, t_{j+1})$  with the terminal condition  $V(t_{j+1}^-, \bar{\mathbf{x}}, \mathbf{y})$  determined from the value function for the next interval  $[t_{j+1}, t_{j+2}]$  at time  $t_{j+1}$  (48). The terminal condition for the last interval  $[t_M, T]$  is  $V(T, \bar{\mathbf{x}}, \mathbf{y}) = 0$ .

We begin with the last interval  $[t_M, T]$  ( $j = M$ ). Since  $V(T, \bar{\mathbf{x}}, \mathbf{y}) = 0$ , then  $g(T, \bar{\mathbf{x}}, \mathbf{y}) = 0$ , and

$$\mathbf{A}^M(T) = \mathbf{0}_{N \times N}, \mathbf{B}^M(T) = \mathbf{0}_{N \times K}, \mathbf{C}^M(T) = \mathbf{0}_{K \times K}, \bar{\mathbf{b}}^M(T) = \mathbf{0}_N, \hat{\mathbf{c}}^M(T) = \mathbf{0}_K, \bar{c}^M(T) = 0.$$

For the last interval  $[t_M, T]$ , we can use Proposition 6 directly with the views  $\mathbf{Y}(t_M, T) = \mathbf{y}$  and views covariance  $\Omega^j$ . It follows that  $\mathbf{A}^j(t)$  ( $j = M$ ) is the solution of the Riccati equation (30),  $\mathbf{B}^j(t) \mathbf{y} + \bar{\mathbf{b}}^j(t)$  satisfies the ODE (31), and

$$-\frac{1}{2} \mathbf{y}^\top \bar{\mathbf{C}}^j(t) \mathbf{y} + \mathbf{y}^\top \hat{\mathbf{c}}^j(t) + \bar{c}^j(t)$$

solves (32). That is,  $\mathbf{A}^j(t) \in \mathbb{R}^{N \times N}$  is negative semi-definite with

$$\mathbf{A}^{j'}(t) + \frac{1-\gamma}{\gamma} \boldsymbol{\eta}_t^j \Sigma \boldsymbol{\eta}_t^j + \frac{1}{\gamma} (\mathbf{A}^j(t) \Sigma \boldsymbol{\eta}_t^j + \boldsymbol{\eta}_t^j \Sigma \mathbf{A}^j(t)) + \frac{1}{\gamma} \mathbf{A}^j(t) \Sigma \mathbf{A}^j(t) = \mathbf{0} \quad (\text{EC.33})$$

where

$$\boldsymbol{\eta}_t^j = -\mathbf{P}^\top ((T - t) \mathbf{P} \Sigma \mathbf{P}^\top + \Omega^j)^{-1} \mathbf{P};$$

$\mathbf{B}^j(t) \in \mathbb{R}^{N \times K}$  and  $\bar{\mathbf{b}}^j(t) \in \mathbb{R}^N$  are solutions of

$$\mathbf{B}^{j'}(t) + \frac{1}{\gamma} (\boldsymbol{\eta}_t^j + \mathbf{A}^j(t)) \Sigma \mathbf{B}^j(t) + \frac{1-\gamma}{\gamma} \boldsymbol{\eta}_t^j \boldsymbol{\alpha}_1^j(t) + \frac{1}{\gamma} \mathbf{A}^j(t) \boldsymbol{\alpha}_1^j(t) = \mathbf{0}, \quad (\text{EC.34})$$

and

$$\bar{\mathbf{b}}^{j'}(t) + \frac{1}{\gamma}(\boldsymbol{\eta}_t^j + \mathbf{A}^j(t))(\boldsymbol{\Sigma}\bar{\mathbf{b}}^j(t) + \boldsymbol{\alpha}_0^j(t) - r_f \mathbf{1}_N) - \boldsymbol{\eta}_t^j(\boldsymbol{\alpha}_0^j(t) - r_f \mathbf{1}_N) + \mathbf{A}^j(t)\left(r_f \mathbf{1}_N - \frac{1}{2}\text{diag}(\boldsymbol{\Sigma})\right) = \mathbf{0}, \quad (\text{EC.35})$$

where

$$\begin{cases} \boldsymbol{\alpha}_1^j(t) = -\boldsymbol{\Sigma}\mathbf{P}^\top((T-t)\mathbf{P}\boldsymbol{\Sigma}\mathbf{P}^\top + \boldsymbol{\Omega}^j)^{-1} \in \mathbb{R}^{N \times K}, \\ \boldsymbol{\alpha}_0^j(t) = \boldsymbol{\mu} - (T-t_j)\boldsymbol{\beta}_1^j\mathbf{P}\boldsymbol{\mu}^x - (t-t_j)\boldsymbol{\Sigma}\boldsymbol{\eta}_t^j(\boldsymbol{\mu}^x - (T-t_j)\boldsymbol{\beta}_1^j\mathbf{P}\boldsymbol{\mu}^x) \in \mathbb{R}^N; \end{cases}$$

and  $\mathbf{C}^j(t) \in \mathbb{R}^{K \times K}$ ,  $\hat{\mathbf{c}}^j(t) \in \mathbb{R}^K$  and  $\bar{c}^j(t) \in \mathbb{R}$  are solutions of

$$\mathbf{C}^{j'}(t) - \frac{1}{\gamma}(\mathbf{B}^j(t) + \boldsymbol{\Sigma}^{-1}\boldsymbol{\alpha}_1^j(t))^\top \boldsymbol{\Sigma}(\mathbf{B}^j(t) + \boldsymbol{\Sigma}^{-1}\boldsymbol{\alpha}_1^j(t)) + \boldsymbol{\alpha}_1^j(t)^\top \boldsymbol{\Sigma}^{-1}\boldsymbol{\alpha}_1^j(t) = \mathbf{0}, \quad (\text{EC.36})$$

$$\begin{aligned} \hat{\mathbf{c}}^{j'}(t) + \frac{1-\gamma}{\gamma}\boldsymbol{\alpha}_1^j(t)\boldsymbol{\Sigma}^{-1}(\boldsymbol{\alpha}_0^j(t) - r_f \mathbf{1}_N) + \frac{1}{\gamma}\boldsymbol{\alpha}_1^j(t)^\top \bar{\mathbf{b}}^j(t) + \mathbf{B}^j(t)^\top(r_f \mathbf{1}_N - \frac{1}{2}\text{diag}(\boldsymbol{\Sigma})) \\ + \frac{1}{\gamma}\mathbf{B}^j(t)^\top(\boldsymbol{\Sigma}\bar{\mathbf{b}}^j(t) + \boldsymbol{\alpha}_0^j(t) - r_f \mathbf{1}_N) = \mathbf{0}, \end{aligned} \quad (\text{EC.37})$$

and

$$\begin{aligned} \bar{c}^{j'}(t) + (1-\gamma)r_f + \frac{1}{2}\text{Tr}(\mathbf{A}^j(t)\boldsymbol{\Sigma}) + \frac{1-\gamma}{2\gamma}(\boldsymbol{\alpha}_0^j(t) - r_f \mathbf{1}_N)^\top \boldsymbol{\Sigma}^{-1}(\boldsymbol{\alpha}_0^j(t) - r_f \mathbf{1}_N) \\ + \left(\boldsymbol{\alpha}_0^j(t) - \frac{1}{2}\text{diag}(\boldsymbol{\Sigma})\right)^\top \bar{\mathbf{b}}^j(t) + \frac{1-\gamma}{\gamma}(\boldsymbol{\alpha}_0^j(t) - r_f \mathbf{1}_N)^\top \bar{\mathbf{b}}^j(t) + \frac{1}{2\gamma}\bar{\mathbf{b}}^j(t)^\top \boldsymbol{\Sigma}\bar{\mathbf{b}}^j(t) = 0. \end{aligned} \quad (\text{EC.38})$$

For earlier time intervals  $[t_j, t_{j+1}]$  ( $j = 0, \dots, M-1$ ),  $g^j(t, \bar{\mathbf{x}}, \mathbf{y})$  can be derived in a similar manner by solving the dynamic programming equation over the interval  $[t_j, t_{j+1}]$ . This gives us the same ODEs for  $\mathbf{A}^j(t)$ ,  $\mathbf{B}^j(t)$ ,  $\bar{\mathbf{b}}^j(t)$ ,  $\mathbf{C}^j(t)$ ,  $\hat{\mathbf{c}}^j(t)$  and  $\bar{c}^j(t)$  when  $j = M$  though with different terminal conditions because they depend on the view  $\mathbf{Y}^{j+1}(t_{j+1}, T)$  and the non-zero value function  $V(t, z, \bar{\mathbf{x}}, \mathbf{y})$  at  $t_{j+1}$  through the Principle of Optimality (48). The following result computes the expectation in (48). The proof can be found in Appendix EC.5.

LEMMA EC.4.

$$\begin{aligned} V(t_{j+1}^-, z, \bar{\mathbf{x}}, \mathbf{y}) &= \mathbb{E}[V(t_{j+1}, z, \mathbf{0}, \mathbf{Y}^{j+1}) | \bar{\mathbf{X}}^y(t_{j+1}^-) = \bar{\mathbf{x}}, \mathbf{I}(t) = \mathbf{y}], \text{ for } j \in \{0, \dots, M-1\} \\ &= U(z) \exp(g^j(t_{j+1}, \bar{\mathbf{x}}, \mathbf{y})), \quad t \in [t_j, t_{j+1}) \end{aligned} \quad (\text{EC.39})$$

where

$$g^j(t_{j+1}, \bar{\mathbf{x}}, \mathbf{y}) = \frac{1}{2}\bar{\mathbf{x}}^\top \mathbf{A}^j(t_{j+1})\bar{\mathbf{x}} + \bar{\mathbf{x}}^\top (\mathbf{B}^j(t_{j+1})\mathbf{y} + \bar{\mathbf{b}}^j(t_{j+1})) + \left(-\frac{1}{2}\mathbf{y}^\top \bar{\mathbf{C}}^j(t_{j+1})\mathbf{y} + \mathbf{y}^\top \hat{\mathbf{c}}^j(t_{j+1}) + \bar{c}^j(t_{j+1})\right)$$

with

$$\begin{aligned} \mathbf{C}^j(t_{j+1}) &= \bar{\boldsymbol{\beta}}_0^{j\top} (\mathbf{C}^{j+1}(t_{j+1})^{-1} + \bar{\boldsymbol{\Omega}}^{j+1|j})^{-1} \bar{\boldsymbol{\beta}}_0^j, \\ \hat{\mathbf{c}}^j(t_{j+1}) &= \bar{\boldsymbol{\beta}}_0^{j\top} (\mathbf{C}^{j+1}(t_{j+1})^{-1} + \bar{\boldsymbol{\Omega}}^{j+1|j})^{-1} (\mathbf{C}^{j+1}(t_{j+1})^{-1} \hat{\mathbf{c}}^{j+1}(t_{j+1}) - \bar{\boldsymbol{\alpha}}_0^j), \\ \bar{c}^j(t_{j+1}) &= \bar{c}^{j+1}(t_{j+1}) + (\bar{\boldsymbol{\beta}}_1^j)^\top \hat{\mathbf{c}}^{j+1}(t_{j+1}) - \frac{1}{2}\bar{\boldsymbol{\beta}}_1^{j\top} \mathbf{C}^{j+1}(t_{j+1})\bar{\boldsymbol{\beta}}_1^j + \ln\left(\det(\mathbf{I}_K + \bar{\boldsymbol{\Omega}}^{j+1|j}\mathbf{C}^{j+1}(t_{j+1}))^{-\frac{1}{2}}\right) \\ &\quad + \frac{1}{2}(\hat{\mathbf{c}}^{j+1}(t_{j+1}) - \mathbf{C}^{j+1}(t_{j+1})\bar{\boldsymbol{\beta}}_1^j)^\top ((\bar{\boldsymbol{\Omega}}^{j+1|j})^{-1} + \mathbf{C}^{j+1}(t_{j+1}))^{-1} (\hat{\mathbf{c}}^{j+1}(t_{j+1}) - \mathbf{C}^{j+1}(t_{j+1})\bar{\boldsymbol{\beta}}_1^j), \end{aligned} \quad (\text{EC.40})$$

$$\mathbf{A}^j(t_{j+1}) = -\mathbf{P}^\top \mathbf{C}^j(t_{j+1})\mathbf{P} \quad (\text{EC.41})$$

and

$$\begin{aligned} \bar{\mathbf{b}}^j(t_{j+1}) &= -\mathbf{P}^\top \hat{\mathbf{c}}^j(t_{j+1}), \\ \mathbf{B}^j(t_{j+1}) &= \mathbf{P}^\top \mathbf{C}^j(t_{j+1}), \end{aligned} \quad (\text{EC.42})$$

where

$$\begin{aligned} \bar{\boldsymbol{\alpha}}_0^j &= (T - t_{j+1})(\boldsymbol{\Omega}^j - \boldsymbol{\Omega}^{j+1}) \left( (T - t_{j+1})\mathbf{P}\boldsymbol{\Sigma}\mathbf{P}^\top + \boldsymbol{\Omega}^j \right)^{-1} \mathbf{P}\boldsymbol{\mu}^x, \\ \bar{\boldsymbol{\beta}}_0^j &= \mathbf{I}_K - (\boldsymbol{\Omega}^j - \boldsymbol{\Omega}^{j+1}) \left( (T - t_{j+1})\mathbf{P}\boldsymbol{\Sigma}\mathbf{P}^\top + \boldsymbol{\Omega}^j \right)^{-1}, \\ \bar{\boldsymbol{\beta}}_1^j &= (T - t_{j+1})(\mathbf{I}_K - \bar{\boldsymbol{\beta}}_0^j)\mathbf{P}\boldsymbol{\mu}^x, \\ \bar{\boldsymbol{\Omega}}^{j+1|j} &= (\boldsymbol{\Omega}^j - \boldsymbol{\Omega}^{j+1}) \left( (T - t_{j+1})\mathbf{P}\boldsymbol{\Sigma}\mathbf{P}^\top + \boldsymbol{\Omega}^j \right)^{-1} \left( (T - t_{j+1})\mathbf{P}\boldsymbol{\Sigma}\mathbf{P}^\top + \boldsymbol{\Omega}^{j+1} \right), \end{aligned}$$

are constants.

For the interval  $[t_j, t_{j+1}]$  ( $j = 0, \dots, M-1$ ) (EC.40) gives the terminal conditions for the ODEs (EC.36)–(EC.38), (EC.41) for the Riccati equation (EC.33), and (EC.42) for the ODEs (EC.34)–(EC.35). This provides us with enough information to solve the 6 ODEs (EC.33)–(EC.38).

The terminal condition for  $\mathbf{A}^j(t)$ ,  $\mathbf{B}^j(t)$  and  $\bar{\mathbf{b}}^j(t)$  suggest that it might be possible to express the solutions of their respective ODEs in terms of  $\mathbf{C}^j(t)$  and  $\hat{\mathbf{c}}^j(t)$ . The following result shows that this is indeed the case, so only 3 of these ODEs instead of 6 need to be solved numerically to compute  $g^j(t, \bar{\mathbf{x}}, \mathbf{y})$  on  $[t_j, t_{j+1}]$ . The proof can be found in Appendix EC.5.

**LEMMA EC.5.** *For  $t \in [t_j, t_{j+1}]$  and  $j \in \{0, \dots, M\}$ , let  $\mathbf{A}^j(t) \in \mathbb{R}^{N \times N}$ ,  $\mathbf{B}^j(t) \in \mathbb{R}^{N \times K}$ , and  $\mathbf{C}^j(t) \in \mathbb{R}^{K \times K}$  be the solutions of (EC.33), (EC.34), and (EC.36), respectively, with boundary conditions specified in Lemma EC.4. Then,*

$$\begin{aligned} \mathbf{A}^j(t) &= -\mathbf{P}^\top \mathbf{C}^j(t)\mathbf{P}, \quad \text{for } t \in [t_j, t_{j+1}], j \in \{0, \dots, M\}, \\ \mathbf{B}^j(t) &= \mathbf{P}^\top \mathbf{C}^j(t), \quad \text{for } t \in [t_j, t_{j+1}], j \in \{0, \dots, M\}. \end{aligned}$$

Furthermore, if  $\bar{\mathbf{b}}^j(t)$  and  $\hat{\mathbf{c}}^j(t)$  are the solutions of (EC.35) and (EC.37), respectively,

$$\bar{\mathbf{b}}^j(t) = -\mathbf{P}^\top \hat{\mathbf{c}}^j(t), \quad \text{for } t \in [t_j, t_{j+1}], j \in \{0, \dots, M\}.$$

It follows that

$$\begin{aligned} g^j(t, \bar{\mathbf{x}}, \mathbf{y}) &= \frac{1}{2} \bar{\mathbf{x}}^\top \mathbf{A}^j(t) \bar{\mathbf{x}} + \bar{\mathbf{x}}^\top (\mathbf{B}^j(t) \mathbf{y} + \bar{\mathbf{b}}^j(t)) + \left( -\frac{1}{2} \mathbf{y}^\top \bar{\mathbf{C}}^j(t) \mathbf{y} + \mathbf{y}^\top \hat{\mathbf{c}}^j(t) + \bar{c}^j(t) \right) \\ &= -\frac{1}{2} (\mathbf{P} \bar{\mathbf{x}} - \mathbf{y})^\top \mathbf{C}^j(t) (\mathbf{P} \bar{\mathbf{x}} - \mathbf{y}) - (\mathbf{P} \bar{\mathbf{x}} - \mathbf{y})^\top \hat{\mathbf{c}}^j(t) + \bar{c}^j(t) \end{aligned}$$

and the hedging demand is

$$\begin{aligned} \frac{1}{\gamma} \frac{\partial g^j}{\partial \bar{\mathbf{x}}}(t, \bar{\mathbf{x}}, \mathbf{y}) &= \frac{1}{\gamma} (\mathbf{A}^j(t) \bar{\mathbf{x}} + \mathbf{B}^j(t) \mathbf{y} + \bar{\mathbf{b}}^j(t)) \\ &= \frac{1}{\gamma} \mathbf{P}^\top (\mathbf{C}^j(t) (\mathbf{y} - \mathbf{P} \bar{\mathbf{x}}) - \hat{\mathbf{c}}^j(t)). \end{aligned}$$

Hence, the hedging demand depends only on two coefficients,  $\mathbf{C}^j(t)$  and  $\hat{\mathbf{c}}^j(t)$  obtained by solving (EC.36)–(EC.37) with boundary conditions (EC.40).

The following result shows that  $\mathbf{C}^j(t)$  and  $\hat{\mathbf{c}}^j(t)$  admit explicit solutions, which we derive. The proof can be found in Appendix EC.5.

LEMMA EC.6. *Let  $\mathbf{C}^j(t) \in \mathbb{R}^{K \times K}$  and  $\hat{\mathbf{c}}^j(t) \in \mathbb{R}^K$  be the solutions to (EC.36) and (EC.37), respectively, with boundary conditions (EC.40). Then*

$$\begin{aligned}\mathbf{C}^j(t) &= \bar{\mathbf{M}}^j(t) \mathbf{P}^\top \bar{\boldsymbol{\eta}}_t^j, \\ \hat{\mathbf{c}}^j(t) &= \bar{\mathbf{M}}^j(t) (\boldsymbol{\Sigma}^{-1}(\boldsymbol{\mu} - r_f \mathbf{1}_N) + (T-t) \mathbf{P}^\top \bar{\boldsymbol{\eta}}_t^j \mathbf{P} \boldsymbol{\mu}^x),\end{aligned}$$

where

$$\bar{\mathbf{M}}^j(t) = -(\gamma - 1)(T-t)(\boldsymbol{\Omega}^j)^{-1} \mathbf{P} \left( \gamma \boldsymbol{\Sigma}^{-1} + (T-t) \mathbf{P}^\top (\boldsymbol{\Omega}^j)^{-1} \mathbf{P} \right)^{-1} \in \mathbb{R}^{K \times N}.$$

It follows from Lemma EC.6 and (EC.32) that

$$\begin{aligned}\frac{1}{\gamma} \frac{\partial g^j}{\partial \bar{\mathbf{x}}}(t, \bar{\mathbf{x}}, \mathbf{y}) &= \frac{1}{\gamma} \mathbf{P}^\top (\mathbf{C}^j(t)(\mathbf{y} - \mathbf{P}\bar{\mathbf{x}}) - \hat{\mathbf{c}}^j(t)) \\ &= \frac{1}{\gamma} \mathbf{P}^\top \mathbf{M}^j(t) \boldsymbol{\Sigma}^{-1} (\tilde{\boldsymbol{\mu}}^j(t, \bar{\mathbf{x}}, \mathbf{y}) - r_f \mathbf{1}_N),\end{aligned}$$

where  $\mathbf{M}^j(t) = -\mathbf{P} \bar{\mathbf{M}}^j(t)$ . The optimal policy is

$$\boldsymbol{\pi}^{j*}(t, \bar{\mathbf{x}}, \mathbf{y}) = \frac{1}{\gamma} \boldsymbol{\Sigma}^{-1} (\tilde{\boldsymbol{\mu}}^j(t, \bar{\mathbf{x}}, \mathbf{y}) - r_f \mathbf{1}_N) + \frac{1}{\gamma} \frac{\partial g^j}{\partial \bar{\mathbf{x}}}(t, \bar{\mathbf{x}}, \mathbf{y}), \text{ for } t \in [t_j, t_{j+1}),$$

where

$$\tilde{\boldsymbol{\mu}}^j(t, \bar{\mathbf{x}}, \mathbf{y}) = \boldsymbol{\mu} + \beta_1^j(\mathbf{y} - (T-t_j) \mathbf{P} \boldsymbol{\mu}^x) + \beta_2^j(t)(\mathbb{E}[\bar{\mathbf{X}}^y(t)] - \bar{\mathbf{x}}), \text{ for } t \in [t_j, t_{j+1})$$

is the drift of the conditional asset price. This concludes the proof.  $\square$

## EC.4.2. Section 6.2

### EC.4.2.1. Proofs of Conditional Market Dynamics

*Proof of Proposition 8.* Assume views  $\{\mathbf{Y}^j(T_j, T_{j+1}), j \in \{0, \dots, M\}\}$  satisfy (51)–(52). Let

$$\bar{\mathbf{X}}^y(t) \triangleq \mathbf{X}(t) \mid (\mathbf{Y}^0(0, T_1), \dots, \mathbf{Y}^j(T_j, T_{j+1})), t \in [T_j, T_{j+1})$$

be the conditional log-returns and refined views  $\{\bar{\mathbf{Y}}^j(T_j, T_{j+1}), j \in \{0, \dots, M\}\}$  be defined by (54).

It follows that

$$\bar{\mathbf{Y}}^j(T_j, T_{j+1}) \mid (\mathbf{X}(T_j), \mathbf{X}(T_{j+1})) = \mathbf{P}(\mathbf{X}(T_{j+1}) - \mathbf{X}(T_j)) + \boldsymbol{\epsilon}^{j,0} \sim \mathcal{N}(\mathbf{P}(\mathbf{X}(T_{j+1}) - \mathbf{X}(T_j)), \boldsymbol{\Omega}^{j,0}).$$

Since  $\{\boldsymbol{\epsilon}^{j,0}, j \in \{1, \dots, M\}\}$  are independent and  $\mathbf{X}(t)$  has independent increments,

$$\{\bar{\mathbf{Y}}^j(T_j, T_{j+1}) \mid j \in \{0, \dots, M\}\}$$

are mutually independent. Let

$$\bar{\mathbf{X}}(t) = \mathbf{X}(t) - \mathbf{X}(T_j), \quad t \in [T_j, T_{j+1})$$

denote the log-return between the time of the last view  $T_j$  and the current time  $t$ . Since the increments of  $\mathbf{X}(t)$  are independent,  $\bar{\mathbf{X}}(t)$  is independent of

$$\{\bar{\mathbf{Y}}^k(T_k, T_{k+1}) \mid k \in \{0, \dots, j-1\}\}.$$

It follows that

$$\begin{aligned} \bar{\mathbf{X}}(t) \mid (\mathbf{Y}^0(0, T_1), \dots, \mathbf{Y}^j(T_j, T_{j+1})) &= \bar{\mathbf{X}}(t) \mid (\bar{\mathbf{Y}}^0(0, T_1), \dots, \bar{\mathbf{Y}}^j(T_j, T_{j+1})) \\ &= \bar{\mathbf{X}}(t) \mid \bar{\mathbf{Y}}^j(T_j, T_{j+1}). \end{aligned}$$

This concludes the proof.  $\square$

**Proof of Proposition 9.** From Proposition 8, we have  $\bar{\mathbf{X}}^y(t) \triangleq \bar{\mathbf{X}}(t) \mid \bar{\mathbf{Y}}^j(T_j, T_{j+1})$  is the log-returns at time  $t$  conditional on noisy views (56).

This setting is analogous to that in Section 3 except: (1) The horizon is now  $[T_j, T_{j+1}]$  instead of  $[0, T]$ , (2) the log-returns are given by  $\bar{\mathbf{X}}(t)$  instead of  $\mathbf{X}(t)$ , and (3) the views vector is  $\bar{\mathbf{Y}}^j(T_j, T_{j+1}) = \bar{\mathbf{y}}^j$  instead  $\mathbf{Y}(0, T) = \mathbf{y}$ . It follows from Proposition 1 that

$$d\bar{\mathbf{X}}^y(t) = \left( \boldsymbol{\mu}^x + \beta_1^j(\bar{\mathbf{y}}^j - (T_{j+1} - T_j)\mathbf{P}\boldsymbol{\mu}^x) + \beta_2^j(t)(\mathbb{E}[\bar{\mathbf{X}}^y(t)] - \bar{\mathbf{X}}^y(t)) \right) dt + d\mathbf{W}^y(t), \quad \text{for } t \in [T_j, T_{j+1})$$

where  $\bar{\mathbf{y}}^j = \mathbf{y}^j - \sum_{i=1}^{\bar{p}} \Phi^i(\mathbf{y}^{j-i} - \mathbf{P}\bar{\mathbf{x}}^{j-i})$ , and

$$\beta_1^j = \boldsymbol{\Sigma}\mathbf{P}^\top((T_{j+1} - T_j)\mathbf{P}\boldsymbol{\Sigma}\mathbf{P}^\top + \boldsymbol{\Omega}^{j,0})^{-1} \in \mathbb{R}^{N \times K},$$

$$\beta_2^j(t) = \boldsymbol{\Sigma}\mathbf{P}^\top((T_{j+1} - t)\mathbf{P}\boldsymbol{\Sigma}\mathbf{P}^\top + \boldsymbol{\Omega}^{j,0})^{-1}\mathbf{P} \in \mathbb{R}^{N \times N},$$

$$\mathbb{E}[\bar{\mathbf{X}}^y(t)] = (t - T_j)(\boldsymbol{\mu}^x + \beta_1^j(\bar{\mathbf{y}}^j - (T_{j+1} - T_j)\mathbf{P}\boldsymbol{\mu}^x)).$$

This completes the proof.  $\square$

**EC.4.2.2. Proof of Theorem 4** The overall structure follows closely the proof of Theorem 3. For each  $j \in \{0, \dots, M\}$  we consider the control problem on the interval  $[T_j, T_{j+1})$  while the transformed view  $\bar{\mathbf{Y}}^j(T_j, T_{j+1})$  is fixed.

Assume

$$V(t, z, \bar{\mathbf{x}}, \bar{\mathbf{y}}) = U(z) \exp(g^j(t, \bar{\mathbf{x}}, \bar{\mathbf{y}})), \quad t \in [T_j, T_{j+1}),$$

where

$$g^j(t, \bar{\mathbf{x}}, \bar{\mathbf{y}}) = \frac{1}{2}\bar{\mathbf{x}}^\top \mathbf{A}^j(t)\bar{\mathbf{x}} + \bar{\mathbf{x}}^\top(\mathbf{B}^j(t)\bar{\mathbf{y}} + \bar{\mathbf{b}}^j(t)) - \frac{1}{2}\bar{\mathbf{y}}^\top \mathbf{C}^j(t)\bar{\mathbf{y}} + \bar{\mathbf{y}}^\top \hat{\mathbf{c}}^j(t) + \bar{c}^j(t). \quad (\text{EC.43})$$

On the last interval  $j = M$ , the terminal condition  $g^M(T, \cdot) = 0$  forces  $\mathbf{A}^M(T) = \mathbf{0}$ ,  $\mathbf{B}^M(T) = \mathbf{0}$ ,  $\mathbf{C}^M(T) = \mathbf{0}$ ,  $\bar{\mathbf{b}}^M(T) = \mathbf{0}$ ,  $\hat{\mathbf{c}}^M(T) = \mathbf{0}$ , and  $\bar{c}^M(T) = 0$ .

Substituting (EC.43) into the HJB equation gives exactly the six coupled ODEs (EC.33)–(EC.38) after replacing  $T$  by  $T_{M+1}$  and  $\mathbf{\Omega}^M$  by  $\mathbf{\Omega}^{M,0}$ . Because these equations coincide with those solved in Appendix EC.4.1.2, their solution is not repeated here.

For  $j < M$ , continuity of the value function at  $t = T_{j+1}$  and independence of  $(\bar{\mathbf{X}}(t), \bar{\mathbf{Y}}^j(T_j, T_{j+1}))$  across quarters imply

$$V(T_{j+1}^-, z, \bar{\mathbf{x}}, \bar{\mathbf{y}}) = \mathbb{E} \left[ V(T_{j+1}, z, \mathbf{0}, \bar{\mathbf{Y}}^{j+1}) \right] = U(z) \exp g^j(T_{j+1}, \bar{\mathbf{x}}, \bar{\mathbf{y}}). \quad (\text{EC.44})$$

The Gaussian conditional expectation is similar to Lemma EC.4 and yields the boundary values

$$\mathbf{A}^j(T_{j+1}) = \mathbf{B}^j(T_{j+1}) = \mathbf{C}^j(T_{j+1}) = \bar{\mathbf{b}}^j(T_{j+1}) = \hat{\mathbf{c}}^j(T_{j+1}) = \mathbf{0},$$

while the scalar term satisfies

$$\begin{aligned} \bar{c}^j(t) + (1 - \gamma)r_f + \frac{1}{2} \text{Tr}(\mathbf{A}^j(t)\mathbf{\Sigma}) + \frac{1 - \gamma}{2\gamma} (\boldsymbol{\alpha}_0^j(t) - r_f \mathbf{1}_N)^\top \mathbf{\Sigma}^{-1} (\boldsymbol{\alpha}_0^j(t) - r_f \mathbf{1}_N) \\ + \left( \boldsymbol{\alpha}_0^j(t) - \frac{1}{2} \text{diag}(\mathbf{\Sigma}) \right)^\top \bar{\mathbf{b}}^j(t) + \frac{1 - \gamma}{\gamma} (\boldsymbol{\alpha}_0^j(t) - r_f \mathbf{1}_N)^\top \bar{\mathbf{b}}^j(t) + \frac{1}{2\gamma} \bar{\mathbf{b}}^j(t)^\top \mathbf{\Sigma} \bar{\mathbf{b}}^j(t) = 0. \end{aligned} \quad (\text{EC.45})$$

with terminal condition

$$\begin{aligned} \bar{c}^j(T_{j+1}) = \ln \det(\mathbf{I}_K + \bar{\mathbf{\Omega}}^{j+1} \mathbf{C}^{j+1}(T_{j+1}))^{-1/2} \\ + \frac{1}{2} (\hat{\mathbf{c}}^{j+1}(T_{j+1}) - \mathbf{C}^{j+1}(T_{j+1}) \bar{\boldsymbol{\alpha}}_0^{j+1})^\top (\mathbf{C}^{j+1}(T_{j+1})^{-1} + \bar{\mathbf{\Omega}}^{j+1})^{-1} (\hat{\mathbf{c}}^{j+1}(T_{j+1}) - \mathbf{C}^{j+1}(T_{j+1}) \bar{\boldsymbol{\alpha}}_0^{j+1}) \\ + \frac{1}{2} \bar{\boldsymbol{\alpha}}_0^{j+1 \top} \mathbf{C}^{j+1}(T_{j+1}) \bar{\boldsymbol{\alpha}}_0^{j+1} + \bar{\boldsymbol{\alpha}}_0^{j+1 \top} (\hat{\mathbf{c}}^{j+1}(T_{j+1}) - \mathbf{C}^{j+1}(T_{j+1}) \bar{\boldsymbol{\alpha}}_0^{j+1}) + \bar{c}^{j+1}(T_{j+1}), \end{aligned} \quad (\text{EC.46})$$

where  $\bar{\boldsymbol{\alpha}}_0^{j+1} = (T_{j+2} - T_{j+1}) \mathbf{P} \boldsymbol{\mu}^x$  and  $\bar{\mathbf{\Omega}}^{j+1} = (T_{j+2} - T_{j+1}) \mathbf{P} \mathbf{\Sigma} \mathbf{P}^\top + \mathbf{\Omega}^{j+1,0}$ .

As in Theorem 3, we can prove that  $\mathbf{A}^j = -\mathbf{P}^\top \mathbf{C}^j \mathbf{P}$ ,  $\mathbf{B}^j = \mathbf{P}^\top \mathbf{C}^j$ ,  $\bar{\mathbf{b}}^j = -\mathbf{P}^\top \hat{\mathbf{c}}^j$ . Therefore only  $\mathbf{C}^j, \hat{\mathbf{c}}^j, \bar{c}^j$  remain to be integrated.

Following the same steps as in the proof of Lemma EC.5, we can show that  $\mathbf{C}^j(t)$  and  $\hat{\mathbf{c}}^j(t)$  are given explicitly by

$$\begin{aligned} \mathbf{C}^j(t) &= \bar{\mathbf{M}}^j(t) \mathbf{P}^\top \bar{\boldsymbol{\eta}}_t^j, \\ \hat{\mathbf{c}}^j(t) &= \bar{\mathbf{M}}^j(t) \left[ \mathbf{\Sigma}^{-1} (\boldsymbol{\mu} - r_f \mathbf{1}_N) + (T_{j+1} - t) \mathbf{P}^\top \bar{\boldsymbol{\eta}}_t^j \mathbf{P} \boldsymbol{\mu}^x \right], \end{aligned}$$

where

$$\bar{\mathbf{M}}^j(t) = -(\gamma - 1)(T_{j+1} - t)(\mathbf{\Omega}^{j,0})^{-1} \mathbf{P} \left[ \gamma \mathbf{\Sigma}^{-1} + (T_{j+1} - t) \mathbf{P}^\top (\mathbf{\Omega}^{j,0})^{-1} \mathbf{P} \right]^{-1}, \quad \bar{\boldsymbol{\eta}}_t^j = -\mathbf{P}^\top ((T_{j+1} - t) \mathbf{P} \mathbf{\Sigma} \mathbf{P}^\top + \mathbf{\Omega}^{j,0})^{-1} \mathbf{P}.$$

Using these expressions in (EC.43) one obtains

$$g^j(t, \bar{\mathbf{x}}, \bar{\mathbf{y}}) = -\frac{1}{2} (\mathbf{P} \bar{\mathbf{x}} - \bar{\mathbf{y}})^\top \mathbf{C}^j(t) (\mathbf{P} \bar{\mathbf{x}} - \bar{\mathbf{y}}) - (\mathbf{P} \bar{\mathbf{x}} - \bar{\mathbf{y}})^\top \hat{\mathbf{c}}^j(t) + \bar{c}^j(t).$$

Hence

$$\boldsymbol{\pi}^{j*}(t, \bar{\mathbf{x}}, \bar{\mathbf{y}}) = \frac{1}{\gamma} \boldsymbol{\Sigma}^{-1} (\tilde{\boldsymbol{\mu}}^j(t, \bar{\mathbf{x}}, \bar{\mathbf{y}}) - r_f \mathbf{1}_N) + \frac{1}{\gamma} \mathbf{P}^\top \mathbf{M}^j(t) \boldsymbol{\Sigma}^{-1} (\tilde{\boldsymbol{\mu}}^j(t, \bar{\mathbf{x}}, \bar{\mathbf{y}}) - r_f \mathbf{1}_N),$$

with  $\mathbf{M}^j(t) = -(\gamma - 1) \bar{\mathbf{M}}^j(t)$  and

$$\tilde{\boldsymbol{\mu}}^j(t, \bar{\mathbf{x}}, \bar{\mathbf{y}}) = \boldsymbol{\mu} + \beta_1^j (\bar{\mathbf{y}} - (T_{j+1} - T_j) \mathbf{P} \boldsymbol{\mu}^x) + \beta_2^j(t) (\mathbb{E}[\bar{\mathbf{X}}(t)] - \bar{\mathbf{x}}).$$

This completes the proof.  $\square$

## EC.5. Proofs: Results in EC.4.1

*Proof of Lemma EC.3.* Revised views (41) satisfy

$$\mathbf{Y}^j(t_j, T) | (\mathbf{X}(t_j), \mathbf{X}(T)) = \mathbf{P} (\mathbf{X}(T) - \mathbf{X}(t_j)) + \boldsymbol{\epsilon}^j \sim \mathcal{N}(\mathbf{P} (\mathbf{X}(T) - \mathbf{X}(t_j)), \boldsymbol{\Omega}^j)$$

where log-returns  $\mathbf{X}(t) = t\boldsymbol{\mu}^x + \mathbf{W}(t)$  from (9) has independent increments. For each  $j \in \{1, \dots, M\}$  and  $t \in [t_j, t_{j+1})$  (with  $t_{M+1} = T$ ) define  $\bar{\mathbf{X}}(t) = \mathbf{X}(t) - \mathbf{X}(t_j)$ . Since  $\mathbf{X}(t)$  has independent increments,  $\bar{\mathbf{X}}(t)$  is independent of  $\{\mathbf{Y}^0(0, T), \dots, \mathbf{Y}^{j-1}(t_{j-1}, T)\}$ , which concludes the proof.  $\square$

*Proof of Lemma EC.4* From the Principle of Optimality

$$V(t_{j+1}^-, z, \bar{\mathbf{x}}, \mathbf{y}) = \mathbb{E}_{\mathbf{Y}^{j+1}} \left[ V(t_{j+1}, z, \mathbf{0}, \mathbf{Y}^{j+1}) \mid Z(t_{j+1}^-) = z, \bar{\mathbf{X}}^y(t_{j+1}^-) = \bar{\mathbf{x}}, \mathbf{I}(t_{j+1}^-) = \mathbf{y} \right].$$

We now evaluate this expectation. Recall that

$$\begin{aligned} V(t_{j+1}, z, \mathbf{0}, \mathbf{y}) &= U(z) \exp(g^j(t_{j+1}, \bar{\mathbf{x}}, \mathbf{y})) \\ &= U(z) \exp\left(-\frac{1}{2} \mathbf{y}^\top \mathbf{C}^j(t_{j+1}) \mathbf{y} + \mathbf{y}^\top \hat{\mathbf{c}}^j(t_{j+1}) + \bar{c}^j(t_{j+1})\right). \end{aligned} \quad (\text{EC.47})$$

From (41) – (42), the random variable  $\mathbf{Y}^{j+1}(t_{j+1}, T) | (\bar{\mathbf{X}}(t_{j+1}^-) = \bar{\mathbf{x}}, \mathbf{Y}^j(t_j, T) = \mathbf{y})$  is Gaussian with conditional mean and covariance

$$\begin{aligned} \bar{\boldsymbol{\mu}}^{j+1|j} &= \bar{\boldsymbol{\alpha}}_0^j - \bar{\boldsymbol{\beta}}_0^j (\mathbf{P} \bar{\mathbf{x}} - \mathbf{y}), \\ \bar{\boldsymbol{\Omega}}^{j+1|j} &= (\boldsymbol{\Omega}^j - \boldsymbol{\Omega}^{j+1}) ((T - t_{j+1}) \mathbf{P} \boldsymbol{\Sigma} \mathbf{P}^\top + \boldsymbol{\Omega}^j)^{-1} ((T - t_{j+1}) \mathbf{P} \boldsymbol{\Sigma} \mathbf{P}^\top + \boldsymbol{\Omega}^{j+1}) \end{aligned}$$

where

$$\begin{aligned} \bar{\boldsymbol{\alpha}}_0^j &= (T - t_{j+1}) (\boldsymbol{\Omega}^j - \boldsymbol{\Omega}^{j+1}) ((T - t_{j+1}) \mathbf{P} \boldsymbol{\Sigma} \mathbf{P}^\top + \boldsymbol{\Omega}^j)^{-1} \mathbf{P} \boldsymbol{\mu}^x, \\ \bar{\boldsymbol{\beta}}_0^j &= \mathbf{I}_K - (\boldsymbol{\Omega}^j - \boldsymbol{\Omega}^{j+1}) ((T - t_{j+1}) \mathbf{P} \boldsymbol{\Sigma} \mathbf{P}^\top + \boldsymbol{\Omega}^j)^{-1}. \end{aligned}$$

It follows that

$$\begin{aligned} V(t_{j+1}^-, z, \bar{\mathbf{x}}, \mathbf{y}) &= \mathbb{E}_{\mathbf{Y}^{j+1}} \left[ V(t_{j+1}, z, \mathbf{0}, \mathbf{Y}^{j+1}) \mid Z(t_{j+1}^-) = z, \bar{\mathbf{X}}^y(t_{j+1}^-) = \bar{\mathbf{x}}, \mathbf{Y}^j(t_j, T) = \mathbf{y} \right] \\ &= \int (2\pi)^{-K/2} \det(\bar{\boldsymbol{\Omega}}^{j+1|j})^{-1/2} \exp\left(-\frac{1}{2} (\mathbf{y}^{j+1} - \bar{\boldsymbol{\mu}}^{j+1|j})^\top (\bar{\boldsymbol{\Omega}}^{j+1|j})^{-1} (\mathbf{y}^{j+1} - \bar{\boldsymbol{\mu}}^{j+1|j})\right) V(t_{j+1}, z, \mathbf{0}) d\mathbf{y}^{j+1} \\ &= U(z) \int (2\pi)^{-K/2} \det(\bar{\boldsymbol{\Omega}}^{j+1|j})^{-1/2} \exp\left(-\frac{1}{2} (\mathbf{y}^{j+1} - \bar{\boldsymbol{\mu}}^{j+1|j})^\top (\bar{\boldsymbol{\Omega}}^{j+1|j})^{-1} (\mathbf{y}^{j+1} - \bar{\boldsymbol{\mu}}^{j+1|j})\right. \\ &\quad \left. - \frac{1}{2} \mathbf{y}^{j+1\top} \mathbf{C}^j(t_{j+1}) \mathbf{y}^{j+1} + \mathbf{y}^{j+1\top} \hat{\mathbf{c}}^j(t_{j+1}) + \bar{c}^j(t_{j+1})\right) d\mathbf{y}^{j+1} \end{aligned}$$

where the last equality follows from (EC.47). By rearranging the terms in the exponential

$$V(t_{j+1}^-, z, \bar{\mathbf{x}}, \mathbf{y}) = U(z) \det(\mathbf{I}_N + \bar{\mathbf{\Omega}}^{j+1|j} \mathbf{C}^{j+1}(t_{j+1}))^{-1/2} \exp(\boldsymbol{\epsilon}(\mathbf{y}, \bar{\mathbf{x}})) \quad (\text{EC.48})$$

$$\times \int (2\pi)^{-K/2} \det(\hat{\mathbf{\Omega}}^{j+1|j})^{-1/2} \exp\left(-\frac{1}{2}(\mathbf{y}^{j+1} - \hat{\boldsymbol{\mu}}^{j+1|j})^\top (\hat{\mathbf{\Omega}}^{j+1|j})^{-1} (\mathbf{y}^{j+1} - \hat{\boldsymbol{\mu}}^{j+1|j})\right) d\mathbf{y}^{j+1}$$

where

$$\begin{aligned} \boldsymbol{\epsilon}(\mathbf{y}, \bar{\mathbf{x}}) &= -\frac{1}{2}(\mathbf{P}\bar{\mathbf{x}} - \mathbf{y})^\top \bar{\boldsymbol{\beta}}_0^{j\top} (\mathbf{C}^{j+1}(t_{j+1})^{-1} + \bar{\mathbf{\Omega}}^{j+1|j})^{-1} \bar{\boldsymbol{\beta}}_0^j (\mathbf{P}\bar{\mathbf{x}} - \mathbf{y}) \\ &\quad - (\mathbf{P}\bar{\mathbf{x}} - \mathbf{y})^\top \bar{\boldsymbol{\beta}}_0^{j\top} (\mathbf{C}^{j+1}(t_{j+1})^{-1} + \bar{\mathbf{\Omega}}^{j+1|j})^{-1} (\mathbf{C}^{j+1}(t_{j+1})^{-1} \hat{\mathbf{c}}^{j+1}(t_{j+1}) - \bar{\boldsymbol{\alpha}}_0^j) + \epsilon_0, \\ \epsilon_0 &= \frac{1}{2}(\hat{\mathbf{c}}^{j+1}(t_{j+1}) - \mathbf{C}^{j+1}(t_{j+1})\bar{\boldsymbol{\alpha}}_0^j)^\top (\mathbf{C}^{j+1}(t_{j+1})^{-1} + \bar{\mathbf{\Omega}}^{j+1|j})^{-1} (\hat{\mathbf{c}}^{j+1}(t_{j+1}) - \mathbf{C}^{j+1}(t_{j+1})\bar{\boldsymbol{\alpha}}_0^j)^\top \\ &\quad + \frac{1}{2}\bar{\boldsymbol{\alpha}}_0^{j\top} \mathbf{C}^{j+1}(t_{j+1})\bar{\boldsymbol{\alpha}}_0^j + \bar{\boldsymbol{\alpha}}_0^{j\top} (\hat{\mathbf{c}}^{j+1}(t_{j+1}) - \mathbf{C}^{j+1}(t_{j+1})\bar{\boldsymbol{\alpha}}_0^j) + \bar{c}^{j+1}(t_{j+1}), \end{aligned} \quad (\text{EC.49})$$

and

$$\begin{aligned} \hat{\mathbf{\Omega}}^{j+1|j} &= ((\bar{\mathbf{\Omega}}^{j+1|j})^{-1} + \mathbf{C}^{j+1}(t_{j+1}))^{-1} \in \mathbb{R}^{K \times K}, \\ \hat{\boldsymbol{\mu}}^{j+1|j} &= \hat{\mathbf{\Omega}}^{j+1|j} (\hat{\mathbf{c}}^{j+1}(t_{j+1}) - \mathbf{C}^{j+1}(t_{j+1}) (\boldsymbol{\alpha}_0^j - \boldsymbol{\beta}_0^j (\mathbf{P}\bar{\mathbf{x}} - \mathbf{y}))) + \bar{\boldsymbol{\mu}}^{j+1|j} \in \mathbb{R}^K. \end{aligned}$$

Notice that the term inside the integral in (EC.48) is the density function of a multivariate Gaussian random variable with mean  $\hat{\boldsymbol{\mu}}^{j+1|j}$  and covariance  $\hat{\mathbf{\Omega}}^{j+1|j}$  so it integrates to 1. It follows that

$$V(t_{j+1}^-, z, \bar{\mathbf{x}}, \mathbf{y}) = U(z) \det(\mathbf{I}_N + \bar{\mathbf{\Omega}}^{j+1|j} \mathbf{C}^{j+1}(t_{j+1}))^{-1/2} \exp(\boldsymbol{\epsilon}(\mathbf{y}, \bar{\mathbf{x}})) \quad (\text{EC.50})$$

where  $\boldsymbol{\epsilon}(\mathbf{y}, \bar{\mathbf{x}})$  given by (EC.49). We now derive the boundary conditions of the ODEs (EC.33)–(EC.38). From (EC.50)

$$\begin{aligned} V(t_{j+1}^-, z, \bar{\mathbf{x}}, \mathbf{y}) &= U(z) \exp\left(\frac{1}{2}\bar{\mathbf{x}}^\top \mathbf{A}^j(t_{j+1})\bar{\mathbf{x}} + \bar{\mathbf{x}}^\top (\mathbf{B}^j(t_{j+1})\mathbf{y} + \bar{\mathbf{b}}^j(t_{j+1})) - \frac{1}{2}\mathbf{y}^\top \mathbf{C}^j(t_{j+1})\mathbf{y} + \mathbf{y}^\top \hat{\mathbf{c}}^j(t_{j+1}) + \bar{c}^j(t_{j+1})\right) \\ &= U(z) \det(\mathbf{I}_N + \bar{\mathbf{\Omega}}^{j+1|j} \mathbf{C}^{j+1}(t_{j+1}))^{-1/2} \exp(\boldsymbol{\epsilon}(\mathbf{y}, \bar{\mathbf{x}})). \end{aligned}$$

It follows that

$$\frac{1}{2}\bar{\mathbf{x}}^\top \mathbf{A}^j(t_{j+1})\bar{\mathbf{x}} + \bar{\mathbf{x}}^\top (\mathbf{B}^j(t_{j+1})\mathbf{y} + \bar{\mathbf{b}}^j(t_{j+1})) - \frac{1}{2}\mathbf{y}^\top \mathbf{C}^j(t_{j+1})\mathbf{y} + \mathbf{y}^\top \hat{\mathbf{c}}^j(t_{j+1}) = \boldsymbol{\epsilon}(\mathbf{y}, \bar{\mathbf{x}}) - \epsilon_0, \quad (\text{EC.51})$$

and

$$\exp(\bar{c}^j(t_{j+1})) = \det(\mathbf{I}_N + \bar{\mathbf{\Omega}}^{j+1|j} \mathbf{C}^{j+1}(t_{j+1}))^{-1/2} \exp(\epsilon_0). \quad (\text{EC.52})$$

It follows from (EC.51) that

$$\begin{aligned} \mathbf{A}^j(t_{j+1}) &= -\mathbf{P}^\top \bar{\boldsymbol{\beta}}_0^{j\top} (\mathbf{C}^{j+1}(t_{j+1})^{-1} + \bar{\mathbf{\Omega}}^{j+1|j})^{-1} \bar{\boldsymbol{\beta}}_0^j \mathbf{P}, \\ \mathbf{B}^j(t_{j+1}) &= \mathbf{P}^\top \bar{\boldsymbol{\beta}}_0^{j\top} (\mathbf{C}^{j+1}(t_{j+1})^{-1} + \bar{\mathbf{\Omega}}^{j+1|j})^{-1} \bar{\boldsymbol{\beta}}_0^j, \\ \mathbf{C}^j(t_{j+1}) &= \bar{\boldsymbol{\beta}}_0^{j\top} (\mathbf{C}^{j+1}(t_{j+1})^{-1} + \bar{\mathbf{\Omega}}^{j+1|j})^{-1} \bar{\boldsymbol{\beta}}_0^j, \\ \bar{\mathbf{b}}^j(t_{j+1}) &= -\mathbf{P}^\top \bar{\boldsymbol{\beta}}_0^{j\top} (\mathbf{C}^{j+1}(t_{j+1})^{-1} + \bar{\mathbf{\Omega}}^{j+1|j})^{-1} (\mathbf{C}^{j+1}(t_{j+1})^{-1} \hat{\mathbf{c}}^{j+1}(t_{j+1}) - \bar{\boldsymbol{\alpha}}_0^j), \\ \hat{\mathbf{c}}^j(t_{j+1}) &= \bar{\boldsymbol{\beta}}_0^{j\top} (\mathbf{C}^{j+1}(t_{j+1})^{-1} + \bar{\mathbf{\Omega}}^{j+1|j})^{-1} (\mathbf{C}^{j+1}(t_{j+1})^{-1} \hat{\mathbf{c}}^{j+1}(t_{j+1}) - \bar{\boldsymbol{\alpha}}_0^j). \end{aligned}$$

Thus, we have  $\mathbf{A}^j(t_{j+1}) = -\mathbf{P}^\top \mathbf{C}^j(t_{j+1})\mathbf{P}$ ,  $\mathbf{B}^j(t_{j+1}) = \mathbf{C}^j(t_{j+1})\mathbf{P}$  and  $\bar{\mathbf{b}}^j(t_{j+1}) = -\mathbf{P}^\top \hat{\mathbf{c}}^j(t_{j+1})$ . Additionally, from (EC.52) we directly get

$$\begin{aligned} \bar{\mathbf{c}}^j(t_{j+1}) &= \bar{\mathbf{c}}^{j+1}(t_{j+1}) + (\bar{\boldsymbol{\beta}}_1^j)^\top \hat{\mathbf{c}}^{j+1}(t_{j+1}) \\ &\quad - \frac{1}{2} \bar{\boldsymbol{\beta}}_1^{j\top} \mathbf{C}^{j+1}(t_{j+1}) \bar{\boldsymbol{\beta}}_1^j + \ln \left( \det(\mathbf{I}_K + \bar{\boldsymbol{\Omega}}^{j+1|j} \mathbf{C}^{j+1}(t_{j+1}))^{-\frac{1}{2}} \right) \\ &\quad + \frac{1}{2} (\hat{\mathbf{c}}^{j+1}(t_{j+1}) - \mathbf{C}^{j+1}(t_{j+1}) \bar{\boldsymbol{\beta}}_1^j)^\top \left( (\bar{\boldsymbol{\Omega}}^{j+1|j})^{-1} + \mathbf{C}^{j+1}(t_{j+1}) \right)^{-1} (\hat{\mathbf{c}}^{j+1}(t_{j+1}) - \mathbf{C}^{j+1}(t_{j+1}) \bar{\boldsymbol{\beta}}_1^j). \end{aligned}$$

This concludes the proof.  $\square$

### **Proof of Lemma EC.5**

From Lemma EC.4 the matrix  $\mathbf{A}^j(t) \in \mathbb{R}^{N \times N}$  ( $t \in [t_j, t_{j+1})$ ,  $j \in \{1, \dots, M\}$ ) and  $\mathbf{B}^j(t) \in \mathbb{R}^{N \times K}$  are solutions of

$$\begin{cases} \mathbf{A}^{j'}(t) + \frac{1-\gamma}{\gamma} \boldsymbol{\eta}_t^j \boldsymbol{\Sigma} \boldsymbol{\eta}_t^j + \frac{1}{\gamma} \left( \mathbf{A}^j(t) \boldsymbol{\Sigma} \boldsymbol{\eta}_t^j + \boldsymbol{\eta}_t^j \boldsymbol{\Sigma} \mathbf{A}^j(t) \right) + \frac{1}{\gamma} \mathbf{A}^j(t) \boldsymbol{\Sigma} \mathbf{A}^j(t) = \mathbf{0}, \\ \mathbf{A}^j(t_{j+1}) = -\mathbf{P}^\top \mathbf{C}^j(t_{j+1})\mathbf{P}, \\ \mathbf{A}^M(T) = \mathbf{0}_{N \times N}, \end{cases} \quad (\text{EC.53})$$

and

$$\begin{cases} \mathbf{B}^{j'}(t) + \frac{1}{\gamma} \left( \boldsymbol{\eta}_t^j + \mathbf{A}^j(t) \right) \boldsymbol{\Sigma} \mathbf{B}^j(t) + \frac{1-\gamma}{\gamma} \boldsymbol{\eta}_t^j \boldsymbol{\alpha}_1^j(t) + \frac{1}{\gamma} \mathbf{A}^j(t) \boldsymbol{\alpha}_1^j(t) = \mathbf{0}, \\ \mathbf{B}^j(t_{j+1}) = \mathbf{P}^\top \mathbf{C}^j(t_{j+1}), \\ \mathbf{B}^M(T) = \mathbf{0}_{N \times K}, \end{cases} \quad (\text{EC.54})$$

respectively, where

$$\begin{aligned} \boldsymbol{\alpha}_1^j(t) &= -\boldsymbol{\Sigma} \mathbf{P}^\top \left( (T-t) \mathbf{P} \boldsymbol{\Sigma} \mathbf{P}^\top + \boldsymbol{\Omega}^j \right), \\ \boldsymbol{\eta}_t^j &= -\mathbf{P}^\top \left( (T-t) \mathbf{P} \boldsymbol{\Sigma} \mathbf{P}^\top + \boldsymbol{\Omega}^j \right) \mathbf{P} = \boldsymbol{\Sigma}^{-1} \boldsymbol{\alpha}_1^j(t) \mathbf{P}. \end{aligned}$$

By direct substitution, it is easy to show that

$$\mathbf{A}^j(t) = -\mathbf{B}^j(t) \mathbf{P}, \quad \text{for } t \in [t_j, t_{j+1}], j \in \{0, \dots, M\}. \quad (\text{EC.55})$$

is a solution of (EC.53). It follows that (EC.54) can be rewritten as

$$\begin{cases} \mathbf{B}^{j'}(t) + \frac{1}{\gamma} \left( \boldsymbol{\eta}_t^j - \mathbf{B}^j(t) \mathbf{P} \right) \boldsymbol{\Sigma} \mathbf{B}^j(t) + \frac{1-\gamma}{\gamma} \boldsymbol{\eta}_t^j \boldsymbol{\alpha}_1^j(t) - \frac{1}{\gamma} \mathbf{B}^j(t) \mathbf{P} \boldsymbol{\alpha}_1^j(t) = \mathbf{0}, \\ \mathbf{B}^j(t_{j+1}) = \mathbf{P}^\top \mathbf{C}^j(t_{j+1}), \\ \mathbf{B}^M(T) = \mathbf{0}_{N \times K}. \end{cases} \quad (\text{EC.56})$$

Next, from Lemma EC.4 we have that  $\mathbf{C}^j(t) \in \mathbb{R}^{K \times K}$  is the solution of

$$\mathbf{C}^{j'}(t) - \frac{1}{\gamma} \left( \mathbf{B}^j(t) + \boldsymbol{\Sigma}^{-1} \boldsymbol{\alpha}_1^j(t) \right)^\top \boldsymbol{\Sigma} \left( \mathbf{B}^j(t) + \boldsymbol{\Sigma}^{-1} \boldsymbol{\alpha}_1^j(t) \right) + \boldsymbol{\alpha}_1^j(t)^\top \boldsymbol{\Sigma}^{-1} \boldsymbol{\alpha}_1^j(t) = \mathbf{0} \quad (\text{EC.57})$$

with boundary conditions given by (EC.40) and  $\mathbf{C}^M(T) = \mathbf{0}_{K \times K}$ . It is easy to show that

$$\mathbf{B}^j(t) = \mathbf{P}^\top \mathbf{C}^j(t), \quad t \in [t_j, t_{j+1}], j \in \{0, \dots, M\}.$$

is a solution of (EC.56) and hence by (EC.55), that  $\mathbf{A}^j(t) = -\mathbf{P}^\top, \mathbf{C}^j(t)\mathbf{P}$ .

Similarly, recall from Lemma EC.4 that

$$\begin{cases} \bar{\mathbf{b}}^j(t) + \frac{1}{\gamma} \left( \boldsymbol{\eta}_t^j + \mathbf{A}^j(t) \right) \left( \boldsymbol{\Sigma} \bar{\mathbf{b}}^j(t) + \boldsymbol{\alpha}_0^j(t) - r_f \mathbf{1}_N \right) - \boldsymbol{\eta}_t^j \left( \boldsymbol{\alpha}_0^j(t) - r_f \mathbf{1}_N \right) \\ \quad + \mathbf{A}^j(t) \left( r_f \mathbf{1}_N - \frac{1}{2} \text{diag}(\boldsymbol{\Sigma}) \right) = \mathbf{0}, \\ \bar{\mathbf{b}}^j(t_{j+1}) = -\mathbf{P}^\top \hat{\mathbf{c}}^j(t_{j+1}), \\ \bar{\mathbf{b}}^M(T) = \mathbf{0}, \end{cases} \quad (\text{EC.58})$$

with

$$\boldsymbol{\alpha}_0^j(t) = \boldsymbol{\mu} - (T - t_j) \boldsymbol{\beta}_1^j \mathbf{P} \boldsymbol{\mu}^x - (t - t_j) \boldsymbol{\Sigma} \boldsymbol{\eta}_t^j \left( \boldsymbol{\mu}^x - (T - t_j) \boldsymbol{\beta}_1^j \mathbf{P} \boldsymbol{\mu}^x \right) \in \mathbb{R}^N.$$

If  $\hat{\mathbf{c}}^j(t)$  is the solution to

$$\begin{aligned} \hat{\mathbf{c}}^j(t) + \frac{1-\gamma}{\gamma} \boldsymbol{\alpha}_1^j(t) \boldsymbol{\Sigma}^{-1} \left( \boldsymbol{\alpha}_0^j(t) - r_f \mathbf{1}_N \right) + \frac{1}{\gamma} \boldsymbol{\alpha}_1^j(t)^\top \bar{\mathbf{b}}^j(t) + \mathbf{B}^j(t)^\top \left( r_f \mathbf{1}_N - \frac{1}{2} \text{diag}(\boldsymbol{\Sigma}) \right) \\ + \frac{1}{\gamma} \mathbf{B}^j(t)^\top \left( \boldsymbol{\Sigma} \bar{\mathbf{b}}^j(t) + \boldsymbol{\alpha}_0^j(t) - r_f \mathbf{1}_N \right) = \mathbf{0}, \end{aligned} \quad (\text{EC.59})$$

with terminal condition  $\hat{\mathbf{c}}^M(T) = \mathbf{0}$ , then

$$\bar{\mathbf{b}}^j(t) = -\mathbf{P}^\top \hat{\mathbf{c}}^j(t), \quad t \in [t_j, t_{j+1}], \quad j \in \{0, \dots, M\}.$$

is a solution to (EC.58). This completes the proof.  $\square$

**Proof of Lemma EC.6.** Recall from Lemma EC.5 that  $\mathbf{C}^j(t) \in \mathbb{R}^{K \times K}$   $j \in \{0, \dots, M\}$  satisfies the Riccati equation

$$\begin{cases} \mathbf{C}^{j'}(t) - \frac{1-\gamma}{\gamma} \bar{\boldsymbol{\eta}}_t^j \mathbf{P} \boldsymbol{\Sigma} \mathbf{P}^\top \bar{\boldsymbol{\eta}}_t^j + \frac{1}{\gamma} \left( \mathbf{C}^j(t) \mathbf{P} \boldsymbol{\Sigma} \mathbf{P}^\top \bar{\boldsymbol{\eta}}_t^j + \bar{\boldsymbol{\eta}}_t^j \mathbf{P} \boldsymbol{\Sigma} \mathbf{P}^\top \mathbf{C}^j(t) \right) - \frac{1}{\gamma} \mathbf{C}^j(t) \mathbf{P} \boldsymbol{\Sigma} \mathbf{P}^\top \mathbf{C}^j(t) = \mathbf{0}, \\ \mathbf{C}^j(t_{j+1}) = \bar{\boldsymbol{\beta}}_0^{j\top} \left( \mathbf{C}^{j+1}(t_{j+1})^{-1} + \bar{\boldsymbol{\Omega}}^{j+1|j} \right)^{-1} \bar{\boldsymbol{\beta}}_0^j, \end{cases} \quad (\text{EC.60})$$

where

$$\begin{aligned} \bar{\boldsymbol{\eta}}_t^j &= - \left( (T-t) \mathbf{P} \boldsymbol{\Sigma} \mathbf{P}^\top + \boldsymbol{\Omega}^j \right)^{-1}, \\ \bar{\boldsymbol{\beta}}_0^j &= \mathbf{I}_K - (\boldsymbol{\Omega}^j - \boldsymbol{\Omega}^{j+1}) \left( (T-t_{j+1}) \mathbf{P} \boldsymbol{\Sigma} \mathbf{P}^\top + \boldsymbol{\Omega}^j \right)^{-1}, \\ \bar{\boldsymbol{\Omega}}^{j+1|j} &= (\boldsymbol{\Omega}^j - \boldsymbol{\Omega}^{j+1}) \left( (T-t_{j+1}) \mathbf{P} \boldsymbol{\Sigma} \mathbf{P}^\top + \boldsymbol{\Omega}^j \right)^{-1} \left( (T-t_{j+1}) \mathbf{P} \boldsymbol{\Sigma} \mathbf{P}^\top + \boldsymbol{\Omega}^{j+1} \right). \end{aligned}$$

The terminal condition is given by  $\mathbf{C}^M(T) = \mathbf{0}_{K \times K}$ . We first show that

$$\mathbf{C}^j(t) = \bar{\boldsymbol{\eta}}_t^j + \left( \frac{T-t}{\gamma} \mathbf{P} \boldsymbol{\Sigma} \mathbf{P}^\top + \boldsymbol{\Omega}^j \right)^{-1} \quad (\text{EC.61})$$

is a solution of (EC.60). To begin, observe that  $\bar{\boldsymbol{\eta}}_t^j$  satisfies the ODE

$$\frac{d\bar{\boldsymbol{\eta}}_t^j}{dt} = -\bar{\boldsymbol{\eta}}_t^j \mathbf{P} \boldsymbol{\Sigma} \mathbf{P}^\top \bar{\boldsymbol{\eta}}_t^j.$$

It follows that  $\mathbf{C}^j(t) = \bar{\boldsymbol{\eta}}_t^j + \mathbf{Q}^j(t)$  is the solution of (EC.60) if a symmetric matrix  $\mathbf{Q}^j(t) \in \mathbb{R}^{K \times K}$  for  $j = \{0, \dots, M\}$  such that

$$\begin{cases} \mathbf{Q}^{j'}(t) - \frac{1}{\gamma} \mathbf{Q}^j(t) \mathbf{P} \boldsymbol{\Sigma} \mathbf{P}^\top \mathbf{Q}^j(t) = \mathbf{0}, \\ \mathbf{Q}^j(t_{j+1}) = -\bar{\boldsymbol{\eta}}_{t_{j+1}}^j + \bar{\boldsymbol{\beta}}_0^{j\top} (\mathbf{C}^{j+1}(t_{j+1})^{-1} + \bar{\boldsymbol{\Omega}}^{j+1|j})^{-1} \bar{\boldsymbol{\beta}}_0^j \end{cases} \quad (\text{EC.62})$$

with terminal condition  $\mathbf{Q}^M(T) = (\boldsymbol{\Omega}^M)^{-1}$  can be found. To establish (EC.61) we show that

$$\mathbf{Q}^j(t) = \left( \frac{T-t}{\gamma} \mathbf{P} \boldsymbol{\Sigma} \mathbf{P}^\top + \boldsymbol{\Omega}^j \right)^{-1}. \quad (\text{EC.63})$$

First, it can be easily verified that

$$\frac{d}{dt} \mathbf{Q}^j(t) = \frac{d}{dt} \left( \frac{T-t}{\gamma} \mathbf{P} \boldsymbol{\Sigma} \mathbf{P}^\top + \boldsymbol{\Omega}^j \right)^{-1} = \frac{1}{\gamma} \mathbf{Q}^j(t) \mathbf{P} \boldsymbol{\Sigma} \mathbf{P}^\top \mathbf{Q}^j(t),$$

therefore, (EC.63) satisfies the differential equation in (EC.62). We now show that (EC.63) satisfies the required terminal and boundary conditions. We can see from (EC.63) that  $\mathbf{Q}^M(T) = (\boldsymbol{\Omega}^M)^{-1}$  so the terminal condition is satisfied so (EC.63) is the solution of (EC.62) and  $\mathbf{C}^M(t) = \bar{\boldsymbol{\eta}}_t^M + \mathbf{Q}^M(t)$  on the interval  $[t_M, T]$ .

Suppose there is a  $j \in \{0, \dots, M-1\}$  such that  $\mathbf{Q}^{j+1}(t)$  is the solution of (EC.62) on  $[t_{j+1}, t_{j+2}]$  and hence

$$\mathbf{C}^{j+1}(t) = \bar{\boldsymbol{\eta}}_t^{j+1} + \mathbf{Q}^{j+1}(t), \quad t \in [t_{j+1}, t_{j+2}]. \quad (\text{EC.64})$$

Using (EC.64), the definitions of  $\bar{\boldsymbol{\eta}}_t^j$ ,  $\bar{\boldsymbol{\Omega}}^{j+1|j}$  and  $\bar{\boldsymbol{\beta}}_0^j$ , and the Woodbury identity

$$-\bar{\boldsymbol{\eta}}_{t_{j+1}}^j + \bar{\boldsymbol{\beta}}_0^{j\top} (\mathbf{C}^{j+1}(t_{j+1})^{-1} + \bar{\boldsymbol{\Omega}}^{j+1|j})^{-1} \bar{\boldsymbol{\beta}}_0^j = \left( \frac{T-t_{j+1}}{\gamma} \mathbf{P} \boldsymbol{\Sigma} \mathbf{P}^\top + \boldsymbol{\Omega}^j \right)^{-1} = \mathbf{Q}^j(t_{j+1})$$

so (EC.63) is the solution of (EC.62) and  $\mathbf{C}^j(t) + \bar{\boldsymbol{\eta}}_t^j + \mathbf{Q}^j(t)$  on  $[t_j, t_{j+1}]$ . It follows from induction that (EC.63) is the solution of (EC.62). Finally, it follows from the Woodbury identity that

$$\mathbf{C}^j(t) = \bar{\mathbf{M}}^j(t) \mathbf{P}^\top \bar{\boldsymbol{\eta}}_t^j,$$

where  $\bar{\mathbf{M}}^j(t) = -(\gamma - 1)(T - t)(\boldsymbol{\Omega}^j)^{-1} \mathbf{P} \left( \gamma \boldsymbol{\Sigma}^{-1} + (T - t) \mathbf{P}^\top (\boldsymbol{\Omega}^j)^{-1} \mathbf{P} \right)^{-1}$ , which completes the first half of the proof of Lemma EC.6.

For the second half, recall from Lemma EC.5 that for  $t \in [t_j, t_{j+1})$ ,  $\hat{\mathbf{c}}^j(t)$  is the solution of

$$\begin{cases} \hat{\mathbf{c}}^{j'}(t) - \frac{1-\gamma}{\gamma} \bar{\boldsymbol{\eta}}_t^j \mathbf{P} (\boldsymbol{\alpha}_0^j(t) - r_f \mathbf{1}_N) + \frac{1}{\gamma} \bar{\boldsymbol{\eta}}_t^j \mathbf{P} \boldsymbol{\Sigma} \mathbf{P}^\top \hat{\mathbf{c}}^j(t) - \frac{1}{\gamma} \mathbf{C}^j(t) \mathbf{P} \boldsymbol{\Sigma} \mathbf{P}^\top \hat{\mathbf{c}}^j(t) + \frac{1-\gamma}{\gamma} \mathbf{C}^j(t) \mathbf{P} (\boldsymbol{\alpha}_0^j(t) - r_f \mathbf{1}_N) \\ \quad + \mathbf{C}^j(t) \mathbf{P} (r_f \mathbf{1}_N - \frac{1}{2} \text{diag}(\boldsymbol{\Sigma})) = \mathbf{0}, \\ \hat{\mathbf{c}}^j(t_{j+1}) = \bar{\boldsymbol{\beta}}_0^{j\top} (\mathbf{C}^{j+1}(t_{j+1})^{-1} + \bar{\boldsymbol{\Omega}}^{j+1|j})^{-1} (\mathbf{C}^{j+1}(t_{j+1})^{-1} \hat{\mathbf{c}}^{j+1}(t_{j+1}) - \bar{\boldsymbol{\alpha}}_0^j), \end{cases} \quad (\text{EC.65})$$

where  $\mathbf{C}^j(t) = \bar{\mathbf{M}}^j(t) \mathbf{P}^\top \bar{\boldsymbol{\eta}}_t^j$ , and

$$\begin{aligned}\boldsymbol{\alpha}_0^j(t) &= \boldsymbol{\mu} + (T-t) \boldsymbol{\Sigma} \mathbf{P}^\top \bar{\boldsymbol{\eta}}_t^j \mathbf{P} \boldsymbol{\mu}^x, \\ \bar{\boldsymbol{\alpha}}_0^j &= -(T-t_{j+1}) (\boldsymbol{\Omega}^j - \boldsymbol{\Omega}^{j+1}) \bar{\boldsymbol{\eta}}_{t_{j+1}}^j \mathbf{P} \boldsymbol{\mu}^x, \\ \bar{\mathbf{M}}^j(t) &= -(\gamma-1)(T-t)(\boldsymbol{\Omega}^j)^{-1} \mathbf{P} \left( \gamma \boldsymbol{\Sigma}^{-1} + (T-t) \mathbf{P}^\top (\boldsymbol{\Omega}^j)^{-1} \mathbf{P} \right)^{-1}.\end{aligned}$$

with the terminal condition  $\hat{\mathbf{c}}^M(T) = \mathbf{0}$ . It can be shown that

$$\hat{\mathbf{c}}^j(t) = \bar{\mathbf{M}}^j(t) \boldsymbol{\Sigma}^{-1} (\boldsymbol{\mu} - r_f \mathbf{1}_N) + (T-t) \mathbf{C}^j(t) \mathbf{P} \boldsymbol{\mu}^x = \bar{\mathbf{M}}^j(t) \left( \boldsymbol{\Sigma}^{-1} (\boldsymbol{\mu} - r_f \mathbf{1}_N) + (T-t) \mathbf{P}^\top \bar{\boldsymbol{\eta}}_t^j \mathbf{P} \boldsymbol{\mu}^x \right),$$

is the solution of (EC.65) by a direct substitution of this expression into the differential equation and boundary conditions.  $\square$

## EC.6. Extension – Views over Different Time Horizons

We now explore a scenario where the expert gives forward-looking views with varying horizons.

### EC.6.1. Views Model

At time  $t = 0$ , the investor receives a vector of  $K$  views on future log-returns, where each view  $j \in [K]$  is a noisy observation of the log-returns vector  $\mathbf{X}(t)$  at time  $t = T_j$ . Specifically, conditional on  $\mathbf{X}(T_j)$ , we assume

$$Y_j(0, T_j) | \mathbf{X}(T_j) = \mathbf{p}_j^\top \mathbf{X}(T_j) + \sqrt{T_j} \epsilon_j \sim \mathcal{N}(\mathbf{p}_j^\top \mathbf{X}(T_j), T_j \omega_{jj}), \quad j \in [K], \quad (\text{EC.66})$$

where  $\mathbf{p}_j \in \mathbb{R}^N$  is a linear mapping from log-returns to the  $j$ -th view, and  $\omega_{jj} > 0$  is the view's noise variance.

*Non-expired views.* Without loss of generality we order the views by their respective time horizons ( $T_i \leq T_j$  for  $i \leq j$ ), and denote  $T_0 = 0$ . Thus, on the  $j$ -th interval  $[T_{j-1}, T_j]$ , we consider the non-expired views  $j, j+1, \dots, K$ . Let

$$\mathbf{Y}^j(0, T_{j:K}) = (Y_j(0, T_j), \dots, Y_K(0, T_K))^\top$$

be the vector of these non-expired views during the  $j$ -th interval  $[T_{j-1}, T_j]$ , with  $\mathbf{T}_{j:K} := (T_j, \dots, T_K)^\top \in \mathbb{R}^{K-j+1}$  and  $\boldsymbol{\epsilon}^j := (\epsilon_j, \dots, \epsilon_K)^\top \sim \mathcal{N}(\mathbf{0}, \boldsymbol{\Omega}^j)$ , the associated noise vector.  $\boldsymbol{\Omega}^j \in \mathbb{R}^{(K-j+1) \times (K-j+1)}$  is positive-definite, its entries  $\omega_{ik}$ , for  $i, k \in \{j, \dots, K\}$ , represent the covariances among the noise terms  $\epsilon_i$  and  $\epsilon_k$ .

Figure EC.2 illustrates the discrete-time Bayesian network in which the views  $\{Y_j(0, T_j)\}_{j=1}^K$  are observed at  $t = 0$ . Each  $Y_j(0, T_j)$  is a noisy observation of  $\mathbf{X}(T_j)$  and, via the Markov property of  $\mathbf{X}$ , it is also an observation about all earlier states (e.g.  $Y_2(0, T_2)$  is an observation of  $\mathbf{X}(T_1)$ ). Therefore the views vector  $\mathbf{Y}^j(0, T_{j:K}) = (Y_j(0, T_j), \dots, Y_K(0, T_K))^\top$ , is a noisy observation of past returns and we can directly use Proposition 1 to obtain the posterior dynamics of the log-returns.

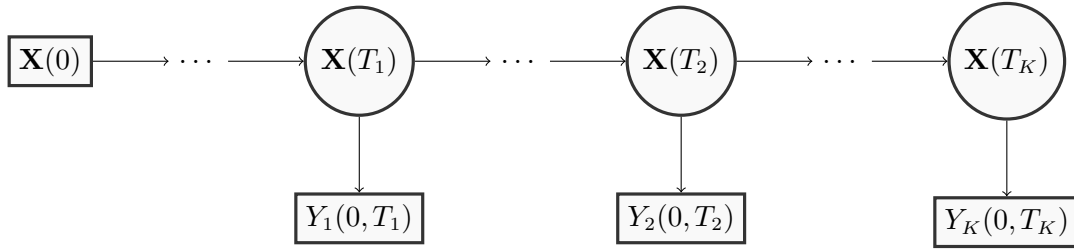

**Figure EC.2** Bayesian network of the Dynamic Black-Litterman model with Different Views Horizons. The figure shows a discrete time version of the problem where  $t = 0, \dots, T_K$ , and the noisy views  $Y_j(0, T_j)$  of the log-return  $\mathbf{X}(T_j)$  for  $j \in [K]$  are revealed at  $t = 0$

### EC.6.2. Market Dynamics Under Expert Views

The following Proposition shows how views from different time horizons can be transformed into views regarding the same time horizon.

**PROPOSITION EC.1.** Consider a stock price following equation (8), and expert views following (EC.66). For  $j \in [K]$ , define the transformation

$$\bar{\mathbf{Y}}^j(0, T_j) = \mathbf{Y}^j(0, T_{j:K}) - \bar{\boldsymbol{\mu}}^j(T_j, T_{j:K}) \quad (\text{EC.67})$$

where  $\bar{\boldsymbol{\mu}}^j(T_j, T_{j:K}) \in \mathbb{R}^{K-j+1}$  with elements

$$\bar{\mu}_i^j(T_j, T_{j:K}) = (T_i - T_j) \mathbf{p}_i^\top \boldsymbol{\mu}^x, \text{ for } i \in \{j, \dots, K\}.$$

Then, conditional on the true realization of  $\mathbf{X}(T_j)$ , the views vector  $\bar{\mathbf{Y}}^j(0, T_j)$  is Gaussian with

$$\bar{\mathbf{Y}}^j(0, T_j) | \mathbf{X}(T_j) = \mathbf{P}_{j:K} \mathbf{X}(T_j) + \bar{\boldsymbol{\epsilon}}^j \sim \mathcal{N}(\mathbf{P}_{j:K} \mathbf{X}(T_j), T_j \bar{\boldsymbol{\Omega}}^j),$$

where  $\mathbf{P}_{j:K} = (\mathbf{p}_j, \dots, \mathbf{p}_K)^\top \in \mathbb{R}^{(K-j+1) \times N}$ , and  $\bar{\boldsymbol{\Omega}}^j$  is positive definite with

$$\bar{\boldsymbol{\Omega}}^j = \mathbf{P}_{j:K} \bar{\boldsymbol{\Omega}}^{jW} (\mathbf{P}_{j:K})^\top + \bar{\boldsymbol{\Omega}}^{jV}$$

where for  $i, k \in \{1, \dots, K-j+1\}$ ,  $\bar{\Omega}_{ik}^{jV} = \frac{\sqrt{T_{j+i-1} T_{j+k-1}}}{T_j} \Omega_{j+i-1, j+k-1}$ , and  $\bar{\Omega}_{ik}^{jW} = \frac{1}{T_j} \min\{T_{j+i-1} - T_j, T_{j+k-1} - T_j\} \Sigma_{j+i-1, j+k-1}$ .

Furthermore

$$\mathbf{X}(t) | \mathbf{Y}^j(0, T_{j:K}) = \mathbf{X}(t) | \bar{\mathbf{Y}}^j(0, T_j), \text{ for } t \in [T_{j-1}, T_j], j \in [K].$$

The conditional dynamics of the log-returns follow directly from Proposition 1.

COROLLARY EC.1. *Suppose that the price process satisfies (8) and expert views  $\mathbf{Y}(0, T)$  satisfy (EC.66). Assume that  $\mathbf{P}\mathbf{L}_j \neq \mathbf{0}$  for  $j \in [N]$ . Conditional on  $\mathbf{Y}(0, T) = \mathbf{y}$ , the log-returns  $\mathbf{X}(t)$  satisfy*

$$d\mathbf{X}^y(t) = \left( \boldsymbol{\mu}^x + \boldsymbol{\beta}_1^j(\bar{\mathbf{y}}^j - T_j \mathbf{P}_{j:K} \boldsymbol{\mu}^x) + \boldsymbol{\beta}_2^j(t)(\mathbb{E}[\mathbf{X}^y(t)] - \mathbf{X}^y(t)) \right) dt + d\mathbf{W}^y(t) \quad (\text{EC.68})$$

where  $\bar{\mathbf{y}}^j$  is sampled from the transformed views vector (EC.67), with

$$\boldsymbol{\beta}_1^j = \frac{1}{T_j} \boldsymbol{\Sigma}(\mathbf{P}_{j:K})^\top (\mathbf{P}_{j:K} \boldsymbol{\Sigma}(\mathbf{P}_{j:K})^\top + \bar{\boldsymbol{\Omega}}^j)^{-1} \in \mathbb{R}^{N \times K},$$

$$\boldsymbol{\beta}_2^j(t) = \boldsymbol{\Sigma}(\mathbf{P}_{j:K})^\top ((T_j - t) \mathbf{P}_{j:K} \boldsymbol{\Sigma}(\mathbf{P}_{j:K})^\top + \bar{\boldsymbol{\Omega}}^j)^{-1} \mathbf{P}_{j:K} \in \mathbb{R}^{N \times N},$$

$$\mathbb{E}[\mathbf{X}^y(t)] = t (\boldsymbol{\mu}^x + \boldsymbol{\beta}_1^j(\bar{\mathbf{y}}^j - T_j \mathbf{P}_{j:K} \boldsymbol{\mu}^x))$$

is the expected log-return over the horizon  $[0, t]$  given  $\mathbf{Y}(0, T) = \mathbf{y}$ .  $\mathbf{W}^y(t) \sim \mathcal{N}(\mathbf{0}, t\boldsymbol{\Sigma})$  is a  $N$ -dimensional Brownian motion adapted to the filtration  $\mathcal{F}_t^{\mathbf{Y}}$ .

Corollary EC.1 shows that having access to views with varying time horizons affect the conditional dynamics solely through the covariance matrix  $\boldsymbol{\Omega}$ .

### EC.6.3. Optimal Policy

Let  $T = T_K$  be the investor's investment horizon, and

$$V(t, z, \mathbf{x}) = \max_{\boldsymbol{\pi} \in \mathcal{A}} \mathbb{E}[U(Z(T)) | \mathbf{X}(t) = \mathbf{x}, Z(t) = z, Y_1(0, T_1) = y_1, \dots, Y_K(0, T_K) = y_k]$$

her value function at time  $t \in [T_{j-1}, T_j]$ , where the wealth process  $Z(t)$  satisfies

$$dZ(t) = Z(t) \left( r_f dt + \boldsymbol{\pi}(t)^\top (\tilde{\boldsymbol{\mu}}(t, \mathbf{X}^y(t), \bar{\mathbf{y}}^j) - r_f \mathbf{1}_N) dt + \boldsymbol{\pi}(t)^\top d\mathbf{W}^y(t) \right),$$

with

$$\tilde{\boldsymbol{\mu}}^j(t, \mathbf{x}, \bar{\mathbf{y}}^j) = \boldsymbol{\mu} + \boldsymbol{\beta}_1^j(\bar{\mathbf{y}}^j - T_j \mathbf{P}_{j:K} \boldsymbol{\mu}^x) + \boldsymbol{\beta}_2^j(t)(\mathbb{E}[\mathbf{X}^y(t)] - \mathbf{x}), \quad t \in [T_{j-1}, T_j].$$

The log-returns  $\mathbf{X}^y(t)$  satisfy (EC.68).

PROPOSITION EC.2. *Suppose  $\gamma > 1$ . For  $j \in [K]$  and  $t \in [T_{j-1}, T_j]$ , the solution to the HJB equation is*

$$V(t, z, \mathbf{x}) = \frac{z^{1-\gamma}}{1-\gamma} \exp(g^j(t, \mathbf{x})), \quad t \in [T_{j-1}, T_j]$$

where

$$g^j(t, \mathbf{x}) = \frac{1}{2} \mathbf{x}^\top \mathbf{A}^j(t) \mathbf{x} + \mathbf{x}^\top \mathbf{b}^j(t) + c^j(t), \quad t \in [T_{j-1}, T_j].$$

The matrix  $\mathbf{A}^j(t)$  is symmetric negative semi-definite for  $t \in [T_{j-1}, T_j]$  and satisfies a Riccati equation

$$\begin{cases} \mathbf{A}^{j'}(t) + \frac{1-\gamma}{\gamma} \boldsymbol{\eta}_t^j \boldsymbol{\Sigma} \boldsymbol{\eta}_t^j + \frac{1}{\gamma} (\mathbf{A}(t) \boldsymbol{\Sigma} \boldsymbol{\eta}_t^j + \boldsymbol{\eta}_t^j \boldsymbol{\Sigma} \mathbf{A}(t)) + \frac{1}{\gamma} \mathbf{A}^j(t) \boldsymbol{\Sigma} \mathbf{A}^j(t) = \mathbf{0}, \\ \mathbf{A}^j(T_j) = \mathbf{A}^{j+1}(T_j), \end{cases} \quad (\text{EC.69})$$

with terminal condition  $\mathbf{A}^K(T) = \mathbf{0}$ , and

$$\boldsymbol{\eta}_t^j = -(\mathbf{P}_{j:K})^\top ((T_j - t)\mathbf{P}_{j:K}\boldsymbol{\Sigma}(\mathbf{P}_{j:K})^\top + T_j\bar{\boldsymbol{\Omega}}^j)^{-1}\mathbf{P}_{j:K}, \quad t \in [T_{j-1}, T_j]. \quad (\text{EC.70})$$

$\mathbf{b}^j(t)$  solves a system of linear ODEs

$$\begin{cases} \mathbf{b}^{j'}(t) + \frac{1}{\gamma}(\boldsymbol{\eta}_t^j + \mathbf{A}^j(t))\boldsymbol{\Sigma}\mathbf{b}^j(t) + \frac{1-\gamma}{\gamma}(\boldsymbol{\eta}_t^j + \mathbf{A}^j(t))(\boldsymbol{\alpha}_t^j - r_f\mathbf{1}_N) + \mathbf{A}^j(t)(\boldsymbol{\alpha}_t^j - \frac{1}{2}\text{diag}(\boldsymbol{\Sigma})) = \mathbf{0}, \\ \mathbf{b}^j(T_j) = \mathbf{b}^{j+1}(T_j), \end{cases} \quad (\text{EC.71})$$

with terminal condition  $\mathbf{b}^K(T) = \mathbf{0}$ , and

$$\boldsymbol{\alpha}_t^j = \boldsymbol{\mu} + \frac{1}{T_j}\boldsymbol{\beta}_1^j(\bar{\mathbf{y}}^j - T_j\mathbf{P}_{j:K}\boldsymbol{\mu}^x) - \boldsymbol{\Sigma}\boldsymbol{\eta}_t^j\mathbb{E}[\mathbf{X}^y(t)].$$

$c^j(t)$  is the solution of

$$\begin{cases} c^{j'}(t) + (1-\gamma)r_f + \frac{1}{2}\text{Tr}(\mathbf{A}^j(t)\boldsymbol{\Sigma}) + \frac{1-\gamma}{2\gamma}(\boldsymbol{\alpha}_t^j - r_f\mathbf{1}_N)^\top\boldsymbol{\Sigma}^{-1}(\boldsymbol{\alpha}_t^j - r_f\mathbf{1}_N) + (\boldsymbol{\alpha}_t^j - \frac{1}{2}\text{diag}(\boldsymbol{\Sigma}))^\top\mathbf{b}^j(t) \\ \quad + \frac{1-\gamma}{\gamma}(\boldsymbol{\alpha}_t^j - r_f\mathbf{1}_N)^\top\mathbf{b}^j(t) + \frac{1}{2\gamma}\mathbf{b}^{j\top}(t)\boldsymbol{\Sigma}\mathbf{b}^j(t) = 0, \\ c^j(T_j) = c^{j+1}(T_j). \end{cases} \quad (\text{EC.72})$$

with  $c^K(T) = 0$ .

There exists a unique optimal allocation policy

$$\boldsymbol{\pi}^{j*}(t, \mathbf{x}, \bar{\mathbf{y}}^j) = \frac{1}{\gamma}\boldsymbol{\Sigma}^{-1}(\bar{\boldsymbol{\mu}}^j(t, \mathbf{x}, \bar{\mathbf{y}}^j) - r_f\mathbf{1}_N) + \frac{1}{\gamma}\frac{\partial g^j}{\partial \mathbf{x}}(t, \mathbf{x}, \bar{\mathbf{y}}^j), \quad t \in [T_{j-1}, T_j], \quad (\text{EC.73})$$

where

$$\frac{\partial g^j}{\partial \mathbf{x}}(t, \mathbf{x}, \bar{\mathbf{y}}^j) = \mathbf{A}^j(t)\mathbf{x} + \mathbf{b}^j(t), \quad t \in [T_{j-1}, T_j].$$

#### EC.6.4. Proofs of the results

**Proof of Proposition EC.1.** As views are ordered according to their horizon, let  $k, j \in [K]$  such that  $k \geq j$ , we can write

$$\begin{aligned} \mathbf{X}(T_k) &= T_j\boldsymbol{\mu}^x + \mathbf{W}(T_j) + (T_k - T_j)\boldsymbol{\mu}^x + \mathbf{W}(T_k) - \mathbf{W}(T_j) \\ &= \mathbf{X}(T_j) + \underbrace{(T_k - T_j)\boldsymbol{\mu}^x + \mathbf{W}(T_k) - \mathbf{W}(T_j)}_{\text{Adjustments}}. \end{aligned}$$

It follows that for  $k \in [K]$ , the view  $Y_k(0, T_k)$  can be transformed to a view about the log-return realization at time  $T_j \leq T_k$

$$Y_k(0, T_k) = \mathbf{p}_k^\top \mathbf{X}(T_j) + \bar{\boldsymbol{\mu}}_k^j(T_j, T_{j:K}) + \bar{\boldsymbol{\epsilon}}_k^j,$$

with

$$\begin{aligned} \bar{\boldsymbol{\mu}}_k^j(T_j, T_{j:K}) &= (T_k - T_j)\mathbf{p}_k^\top \boldsymbol{\mu}^x, \\ \bar{\boldsymbol{\epsilon}}_k^j &= \mathbf{p}_k^\top (\mathbf{W}(T_k) - \mathbf{W}(T_j)) + \sqrt{T_k}\boldsymbol{\epsilon}_k. \end{aligned}$$

Now given the views horizons vector  $\mathbf{T}_{j:K} = (T_j, \dots, T_K)^\top \in \mathbb{R}^{K-j+1}$ , and the linear mapping  $\mathbf{P}_{j:K} = (\mathbf{p}_j, \dots, \mathbf{p}_K)^\top \in \mathbb{R}^{(K-j+1) \times N}$ , we can write

$$\mathbf{Y}^j(0, T_{j:K}) = \mathbf{P}_{j:K} \mathbf{X}(T_j) + \bar{\boldsymbol{\mu}}^j(T_j, T_{j:K}) + \bar{\boldsymbol{\epsilon}}^j,$$

where  $\bar{\boldsymbol{\epsilon}}^j \in \mathbb{R}^{K-j+1 \times K-j+1}$  is Gaussian with  $\bar{\boldsymbol{\epsilon}}^j \sim \mathcal{N}(\mathbf{0}, T_j \bar{\boldsymbol{\Omega}}^j)$ , and the covariance matrix  $\bar{\boldsymbol{\Omega}}^j$  takes the form

$$\bar{\boldsymbol{\Omega}}^j = \bar{\boldsymbol{\Omega}}^{Vj} + \mathbf{P}_{j:K} \bar{\boldsymbol{\Omega}}^{Wj} (\mathbf{P}_{j:K})^\top,$$

where for  $i, k \in \{1, \dots, K - j + 1\}$ , we have  $\bar{\Omega}_{ik}^{jV} = \frac{\sqrt{T_{j+i-1} T_{j+k-1}}}{T_j} \Omega_{j+i-1, j+k-1}$ , and  $\bar{\Omega}_{ik}^{jW} = \frac{1}{T_j} \min\{T_{j+i-1} - T_j, T_{j+k-1} - T_j\} \Sigma_{j+i-1, j+k-1}$ . It follows that

$$\bar{\mathbf{Y}}^j(0, T_j) = \mathbf{Y}^j(0, T_{j:K}) - \bar{\boldsymbol{\mu}}^j(T_j, T_{j:K}) = \mathbf{P}_{j:K} \mathbf{X}(T_j) + \bar{\boldsymbol{\epsilon}}^j \sim \mathcal{N}(\mathbf{P}_{j:K} \mathbf{X}(T_j), T_j \bar{\boldsymbol{\Omega}}^j).$$

Furthermore, since  $\bar{\mathbf{Y}}^j(0, T_j)$  contain the same information as  $\mathbf{Y}^j(0, T_{j:K})$ , it follows that

$$\mathbf{X}(t) | \mathbf{Y}^j(0, T_{j:K}) = \mathbf{X}(t) | \bar{\mathbf{Y}}^j(0, T_j), \quad t \in [T_{j-1}, T_j].$$

□

**Proof of Proposition EC.2.** The proof of this proposition is straightforward. We apply the results from Section 5, substituting the horizon  $T$  with  $T_j$  and the view  $\mathbf{y}$  with  $\bar{\mathbf{y}}^j$  for each  $j \in [K]$ . This directly leads to the derivation of ODEs (EC.69)–(EC.72). Furthermore, the boundary conditions are established by the continuation of the value function and the Principle of Optimality. Therefore,  $\mathbf{A}^j(T_j) = \mathbf{A}^{j+1}(T_j)$ ,  $\mathbf{b}^j(T_j) = \mathbf{b}^{j+1}(T_j)$ , and  $c^j(T_j) = c^{j+1}(T_j)$ . This concludes the proof. □

## References

- Richard Durrett. *Stochastic calculus: a practical introduction*, volume 6. CRC Press, Boca Raton, 1;2;1st; edition, 1996;2018;. ISBN 0849380715;9780849380716;.
- William W. Hager. Updating the inverse of a matrix. *SIAM Review*, 31(2):221–239, 1989. ISSN 00361445. URL <http://www.jstor.org/stable/2030425>.
- Tzon-Tzer Lu and Sheng-Hua Shiou. Inverses of  $2 \times 2$  block matrices. *Computers & Mathematics with Applications*, 43(1):119–129, 2002. ISSN 0898-1221. doi: [https://doi.org/10.1016/S0898-1221\(01\)00278-4](https://doi.org/10.1016/S0898-1221(01)00278-4). URL <https://www.sciencedirect.com/science/article/pii/S0898122101002784>.
- Daniel Revuz and Marc Yor. *Continuous Martingales and Brownian Motion*. Springer, 3rd edition, 1999.
- Bernt Øksendal. *Stochastic Differential Equations: An Introduction with Applications*. Springer, 6th edition, 2003.
